# Supplementary material for: Mechanistic study of the competitiveness between branched and linear polyethylene production on N-arylcyano-β-diketiminate nickel hydride
Source: Royal Society of Chemistry journal article supplement (doi:10.1039/d0py01027h), 2020-01-01
Supplement: d0py01027h1.pdf [file d0py01027h1.pdf]

## Mechanistic Study of the Competitiveness Between Branched and Linear Polyethylene Production on *N*-Arylciano- $\beta$ -diketiminato Nickel Hydride

Daniela E. Ortega,<sup>a,b</sup> Diego Cortés-Arriagada,<sup>c</sup> Oleksandra S. Trofymchuk,<sup>d</sup> Fabiane M. Nachtigall,<sup>e</sup> Leonardo S. Santos,<sup>f</sup> René S. Rojas\*<sup>g</sup> and Alejandro Toro-Labbé\*<sup>b</sup>

<sup>a</sup> Centro Integrativo de Biología y Química Aplicada (CIBQA), Universidad Bernardo O'Higgins, Santiago 8370854, Chile.

<sup>b</sup> Laboratorio de Química Teórica Computacional (QTC), Facultad de Química y Farmacia, Pontificia Universidad Católica de Chile, Santiago 7820436, Chile.

<sup>c</sup> Programa Institucional de Fomento a la Investigación, Desarrollo e Innovación, Universidad Tecnológica Metropolitana, Ignacio Valdivieso 2409, San Joaquín, Santiago 8940577, Chile.

<sup>d</sup> Núcleo Científico Multidisciplinario-DI, Universidad de Talca, P.O. Box 747 Talca, Chile.

<sup>e</sup> Instituto de Ciencias Químicas Aplicadas, Universidad Autónoma de Chile, Sede Talca 3467987, Chile.

<sup>f</sup> Instituto de Química de Recursos Naturales, Universidad de Talca, Casilla 747, Talca, Chile.

<sup>g</sup> Laboratorio de Química Inorgánica, Facultad de Química y Farmacia, Pontificia Universidad Católica de Chile, Santiago 7820436, Chile.

\*Correspondence to: atola@uc.cl, rrojasg@uc.cl.

### Contents

|      |                            |     |
|------|----------------------------|-----|
| I.   | Experimental Section.....  | S2  |
| II.  | Computational Studies..... | S3  |
| III. | References .....           | S57 |

## I. Experimental Section

**Experimental.** Electrospray Ionization Mass Spectrometry (ESI-MS) was applied to identify the catalytically active species, which are responsible for the ethylene polymerization; the catalytic system **c** was taken as representative (Scheme 1). The catalyst (4.23  $\mu\text{mol}$ , 2.0 mg) and saturated solution of ethylene, in anhydrous and degassed toluene (5.0 mL), were mixed with anhydrous and degassed solution of  $\text{B}(\text{C}_6\text{F}_5)_3$  (21.15  $\mu\text{mol}$ , 11.0 mg) under Ar atmosphere using a dual-syringe pump operating at a flow rate of 1  $\mu\text{L}$ -100 mL/min in an effective micromixer, that was coupled directly to the ion source of the mass spectrometer. The solution was fed continuously into the MS and the flow rate could be varied from 2.0 to 100  $\mu\text{L}/\text{min}$ . By connecting the microreactor directly to the spray capillary, reaction times from 0.3 s to min could be covered. ESI-MS and ESI-MS/MS analyses were conducted in a Bruker Daltonics AmaZon SL ion trap mass spectrometer (Bruker Daltonics, Bremen, Germany). The ESI source and the mass spectrometer were operated in the positive-ion mode, and the capillary voltage and drying gas temperature set to +4.0 kV and 220  $^\circ\text{C}$ , respectively, with a scan range of  $m/z$  70-2000. Drying gas flow and nebulizing gas pressure were set to 5.0 L/min and 8.0 psi, respectively. MS/MS experiments were carried out by mass selection of a specific ion in the ion trap, which was then submitted to collision-induced dissociation (CID) with helium (He) in the collision chamber. Mass spectra of the poorly soluble product were carried out using Matrix-Assisted Laser Desorption Ionization Time-of-Flight (MALDI-TOF) technique. Mass spectra were recorded on a Bruker Autoflex Speed system equipped with a pulsed nitrogen laser (337 nm) (Bruker Daltonics Inc., Bremen Germany), operating in positive ion reflector mode, using 19 kV acceleration voltage and alpha-cyano-4-hydroxycinnamic acid as matrix.

**Mass Spectrometry Experiments.** MS/MS experiments were carried out by mass selection of a specific ion in the ion-trap, which was then submitted to collision-induced dissociation (CID) with helium (He) in the collision chamber. Mass spectra of the poorly soluble product were carried out using Matrix-Assisted Laser Desorption Ionization Time-of-Flight (MALDI-TOF) technique. Mass spectra were recorded on a Bruker Autoflex Speed system equipped with a pulsed nitrogen laser (337 nm) (Bruker Daltonics Inc., Bremen Germany), operating in positive ion reflector mode, using 19 kV acceleration voltage and alpha-cyano-4-hydroxycinnamic acid as matrix.

**Polymer Characterization.** By ESI-MS experiments we had not observed any different products of ethylene insertions into **c1** or **c** nickel species from those shown

in Figure 2 (main manuscript), presumably due to their short lifetimes and low solubility.

However, polymeric products formed during the ESI-MS experiments (see Figure 1-2 in the manuscript) were further analyzed by MALDI-TOF technique confirming the presence of polymer (see Figure 3 in the main manuscript). We were able to detect products of up to 36 insertions of ethylene.<sup>1</sup>

## II. Computational Studies

**Computational Details.** DFT calculations were carried out using Gaussian 16 package.<sup>2</sup> Geometries were optimized using the M06L<sup>3</sup> functional and a mixed basis set of SDD<sup>4, 5</sup> for Ni, and the def2-SVP<sup>6, 7</sup> basis set for other atoms. Frequency calculations characterized the nature of the stationary points. Single-point energies were calculated with the M06L functional with Grimme D3<sup>8</sup> dispersion corrections, SDD and def2-TZVP<sup>6, 7</sup> basis sets were used for Ni and all other atoms, respectively. Solvation energy calculations by SMD<sup>9</sup> continuum solvation model were performed on gas-phase optimized geometries. Toluene ( $\epsilon=2.37$ ) was used in the SMD calculations for consistency with the experiment. All reported Gibbs free energies involve zero-point vibrational energy corrections, thermal corrections to the Gibbs free energy at 323.15, 333.15, and 343.15 K, were calculated in order to obtain a reasonable comparison of the stabilities and entropic effects of the catalytic systems involved in the production of linear or branched chains (experimental conditions).

Interaction energies were computed from optimized geometries in Gaussian 16 with the use of the second-generation energy decomposition analysis based on the absolutely localized molecular orbitals (ALMO-EDA2)<sup>10, 11</sup> in Q-Chem 5.2 package<sup>12</sup> under the same level of theory. ALMO-EDA2 calculations were performed in gas-phase because their current implementation does not allow solvent corrections. Energies obtained through single-point calculations in Q-Chem 5.2 are in good agreement with the computed energies in Gaussian 16 (see Table S1).

The energetic span model ( $\delta G$ )<sup>13</sup> was performed to characterize the selectivity of the catalytic cycles that follow the formation of linear or branched chain. This model provides a way to calculate the TOF from Gibbs free energy profiles based on DFT calculations. Using this model we were able to identify the energy states of one transition state and one intermediary of each reaction path; (i) the TOF determining transition state (TDTS) and (ii) the TOF determining intermediate (TDI) determine if

the catalytic cycle understudy is favorable or not. TDTS and TDI are the most important species that determine the catalytic activity (TOF) of a reaction pathway, which is not necessarily adjoining along the reaction pathway of a catalytic cycle, they are the states that maximize  $\delta G$ .

The  $\delta G$  can be calculated as the energetic difference between TDTS and TDI ( $\delta G = \text{TDTS} - \text{TDI}$ ), where lower values of the  $\delta G$  indicate a more favorable catalytic cycle and where the catalytic activity by this model can be obtained as:

$$TOF = \frac{k_B T}{h} e^{-\delta G/RT}$$

with  $k_B$  as the Boltzmann constant,  $T$  corresponds to the temperature (323.15, 333.15, and 343.15 K),  $h$  is the Planck constant and  $R$  is the gas constant. Therefore, the great advantage of the energetic span model is that by knowing the location of the determining states (TDTS and TDI) that gives insights on the species that must be modified to improve the course of a catalytic cycle.

The steric effects around the nickel center were measured by calculations of percent buried volumen ( $\%V_{\text{bur}}$ ) with the SambVca 2.0 web tool developed by Cavallo et al.<sup>14</sup> NCI (non-covalent interactions)<sup>15</sup> plots were computed in the Multiwfn 3.7 program<sup>16</sup> in order to characterize the interactions between the substrate and the second coordination sphere in the chain propagation and termination transition state structures. NCI is based on the electron density and the reduced density gradients (RDG) characterizing attractive or repulsive inter- and intramolecular non-covalent interactions by colors (red, strong repulsion; blue, strong attraction; and green, weak attractive interaction). Most important structures had been represented by using CYLView.<sup>17</sup>

**Table S1.** Summary of electronic energies computed in Gaussian and Q-Chem for chain propagation (c1b- c1b\*) and termination (c1c-c1c\*) pairwise.

| System         | <i>E</i> (Hartree) Gaussian M06L/SDD/def2-SVP | <i>E</i> (Hartree) Q-Chem M06L/SDD/def2-SVP |
|----------------|-----------------------------------------------|---------------------------------------------|
| <b>c1b-R</b>   | -3629.9171549                                 | -3629.909955                                |
| <b>c1b*-R</b>  | -3629.9187541                                 | -3629.910526                                |
| <b>c1b-TS</b>  | -3629.8926546                                 | -3629.885774                                |
| <b>c1b*-TS</b> | -3629.8976328                                 | -3629.891087                                |
| <b>c1c-R</b>   | -3708.4794826                                 | -3708.473362                                |
| <b>c1c*-R</b>  | -3708.4706383                                 | -3708.461221                                |
| <b>c1c-TS</b>  | -3708.4583355                                 | -3708.456621                                |
| <b>c1c*-TS</b> | -3708.454003                                  | -3708.445936                                |

**Table S2.** Optimized distances (Å) and angles (°) for **c1** and  $\pi$ -complexes **c1a-c1c** (i). H<sup>C</sup> represents the exchange between H and C (ii) from new ethylene insertions in **c1b-c1c** (once C <sub>$\beta$</sub> -H bond is formed in P<sub>c1a</sub>). H <sub>$\beta$</sub>  represents the  $\beta$ -hydrogen in the agostic product structures for **c1b\***, **c1c** and **c1c\*** (iii).

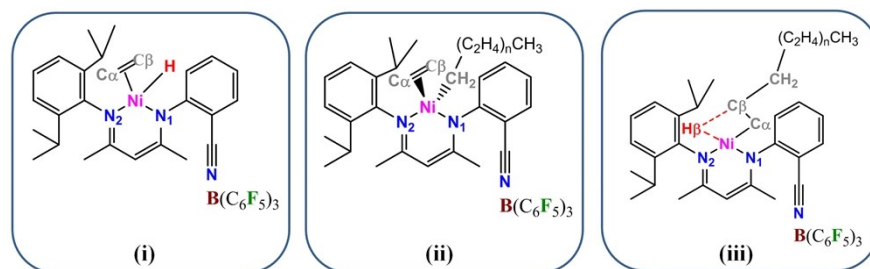

| System      |                                       | Ni-N <sub>1</sub> | Ni-N <sub>2</sub> | Ni-C <sub><math>\beta</math></sub> | Ni-C <sub><math>\alpha</math></sub> | C <sub><math>\alpha</math></sub> -C <sub><math>\beta</math></sub> | Ni-H <sup>C</sup>                                        | C <sub><math>\beta</math></sub> -H <sup>C</sup>          | $\angle$ Ni-C <sub><math>\alpha</math></sub> -C <sub><math>\beta</math></sub> | $\angle$ N <sub>1</sub> -Ni-N <sub>2</sub> |
|-------------|---------------------------------------|-------------------|-------------------|------------------------------------|-------------------------------------|-------------------------------------------------------------------|----------------------------------------------------------|----------------------------------------------------------|-------------------------------------------------------------------------------|--------------------------------------------|
| <b>c1</b>   |                                       | 1.88              | 1.93              | -                                  | -                                   | -                                                                 | H <sup>1.48</sup>                                        | -                                                        | -                                                                             | 94.80                                      |
| <b>c1a</b>  | R <sub>c1a</sub>                      | 1.92              | 2.00              | 2.02                               | 2.04                                | 1.39                                                              | H <sup>1.48</sup>                                        | H <sup>2.32</sup>                                        | 67.85                                                                         | 94.47                                      |
|             | TS <sub>c1a</sub>                     | 1.94              | 1.90              | 2.15                               | 1.94                                | 1.44                                                              | H <sup>1.59</sup>                                        | H <sup>1.43</sup>                                        | 77.39                                                                         | 95.87                                      |
|             | P <sub>c1a</sub>                      | 1.94              | 1.86              | 2.21                               | 1.90                                | 1.49                                                              | H <sup>1.76</sup>                                        | H <sup>1.11</sup>                                        | 80.42                                                                         | 97.18                                      |
| <b>c1b</b>  | R <sub>c1b</sub>                      | 2.02              | 2.01              | 1.97                               | 2.02                                | 1.40                                                              | C <sup>1.93</sup>                                        | C <sup>2.77</sup>                                        | 67.34                                                                         | 90.86                                      |
|             | TS <sub>c1b</sub>                     | 1.92              | 1.99              | 2.00                               | 1.93                                | 1.44                                                              | C <sup>2.05</sup>                                        | C <sup>2.01</sup>                                        | 71.06                                                                         | 93.96                                      |
|             | P <sub>c1b</sub>                      | 1.86              | 1.89              | 2.67                               | 1.91                                | 1.53                                                              | C <sup>2.48</sup>                                        | C <sup>1.53</sup>                                        | 97.63                                                                         | 95.76                                      |
| <b>c1b*</b> | R <sub>c1b*</sub>                     | 2.00              | 2.00              | 1.95                               | 1.98                                | 1.41                                                              | C <sup>1.96</sup>                                        | C <sup>2.73</sup>                                        | 67.94                                                                         | 92.20                                      |
|             | TS <sub>c1b*</sub>                    | 2.01              | 1.94              | 1.99                               | 1.94                                | 1.44                                                              | C <sup>2.08</sup>                                        | C <sup>2.01</sup>                                        | 70.40                                                                         | 93.34                                      |
|             | P <sub>c1b*</sub>                     | 1.94              | 1.87              | 2.12                               | 1.90                                | 1.48                                                              | H <sub><math>\beta</math></sub> 1.67 / C <sup>2.99</sup> | H <sub><math>\beta</math></sub> 1.18 / C <sup>1.52</sup> | 76.45                                                                         | 97.06                                      |
|             | TS <sub>c1b*<math>\beta</math>H</sub> | 1.93              | 1.95              | 2.04                               | 1.98                                | 1.42                                                              | H <sub><math>\beta</math></sub> 1.45 / C <sup>1.84</sup> | H <sub><math>\beta</math></sub> 1.82 / C <sup>1.51</sup> | 71.73                                                                         | 94.79                                      |
|             | P <sub>c1b*<math>\beta</math>H</sub>  | 1.95              | 1.98              | 2.00                               | 1.94                                | 1.40                                                              | H <sub><math>\beta</math></sub> 1.41 / C <sup>3.03</sup> | H <sub><math>\beta</math></sub> 2.32 / C <sup>1.51</sup> | 71.11                                                                         | 94.67                                      |
|             | cw                                    | 1.87              | 1.90              | -                                  | -                                   | -                                                                 | 1.96                                                     | -                                                        | -                                                                             | 96.61                                      |
| <b>c1c</b>  | R <sub>c1c</sub>                      | 2.00              | 2.02              | 1.96                               | 1.99                                | 1.41                                                              | C <sup>1.97</sup>                                        | C <sup>2.72</sup>                                        | 67.75                                                                         | 91.86                                      |
|             | TS <sub>c1c</sub>                     | 2.00              | 1.94              | 1.99                               | 1.93                                | 1.44                                                              | C <sup>2.08</sup>                                        | C <sup>2.02</sup>                                        | 70.63                                                                         | 93.57                                      |
|             | P <sub>c1c</sub>                      | 1.95              | 1.88              | 2.14                               | 1.91                                | 1.47                                                              | H <sub><math>\beta</math></sub> 1.65 / C <sup>3.21</sup> | H <sub><math>\beta</math></sub> 1.18 / C <sup>1.52</sup> | 77.62                                                                         | 96.84                                      |
|             | TS <sub>c1c<math>\beta</math>H</sub>  | 1.93              | 1.96              | 2.04                               | 1.98                                | 1.42                                                              | H <sub><math>\beta</math></sub> 1.44 / C <sup>2.87</sup> | H <sub><math>\beta</math></sub> 1.86 / C <sup>1.50</sup> | 71.91                                                                         | 94.56                                      |
| <b>c1c*</b> | P <sub>c1c<math>\beta</math>H</sub>   | 1.93              | 1.98              | 2.01                               | 1.97                                | 1.40                                                              | H <sub><math>\beta</math></sub> 1.44 / C <sup>3.32</sup> | H <sub><math>\beta</math></sub> 2.16 / C <sup>1.50</sup> | 70.90                                                                         | 93.99                                      |
|             | R <sub>c1c*</sub>                     | 2.02              | 2.07              | 1.95                               | 2.02                                | 1.40                                                              | C <sup>2.03</sup>                                        | C <sup>2.96</sup>                                        | 66.82                                                                         | 90.75                                      |
|             | TS <sub>c1c*</sub>                    | 2.01              | 1.95              | 2.01                               | 1.94                                | 1.43                                                              | C <sup>2.13</sup>                                        | C <sup>2.09</sup>                                        | 71.60                                                                         | 93.02                                      |
|             | P <sub>c1c*</sub>                     | 1.95              | 1.89              | 2.15                               | 1.90                                | 1.47                                                              | H <sub><math>\beta</math></sub> 1.66 / C <sup>3.25</sup> | H <sub><math>\beta</math></sub> 1.18 / C <sup>1.53</sup> | 77.90                                                                         | 97.01                                      |
|             | TS <sub>c1c*<math>\beta</math>H</sub> | 1.95              | 1.98              | 2.15                               | 2.00                                | 1.41                                                              | H <sub><math>\beta</math></sub> 1.46 / C <sup>3.09</sup> | H <sub><math>\beta</math></sub> 1.85 / C <sup>1.51</sup> | 75.97                                                                         | 94.27                                      |
|             | P <sub>c1c*<math>\beta</math>H</sub>  | 1.93              | 1.96              | 2.19                               | 2.01                                | 1.39                                                              | H <sub><math>\beta</math></sub> 1.45 / C <sup>3.20</sup> | H <sub><math>\beta</math></sub> 1.93 / C <sup>1.51</sup> | 77.69                                                                         | 94.14                                      |

**Table S3.** Interaction energy ( $\Delta E_{\text{int}}$ ) decomposition in terms of  $\Delta E_{\text{Pauli}}$ ,  $\Delta E_{\text{elstat}}$ ,  $\Delta E_{\text{disp}}$ ,  $\Delta E_{\text{pol}}$  and  $\Delta E_{\text{CT}}$  energies for the ground state (R) and transition state (TS) geometries for the propagation and termination steps.  $\Delta E$  is the difference in energy between the Ni-complex and the monomer.  $\Delta\Delta E$  is the difference in energy between the ground state and transition state geometries. And  $\Delta\Delta\Delta E$  is the difference in  $\Delta\Delta E$  for pairwise combinations c1b-c1b\* and c1c-c1c\*, respectively. Energies are in kcal mol<sup>-1</sup>.

| Energy Term                            | c1b    |        | c1b*   |        | c1c    |        | c1c*   |        |
|----------------------------------------|--------|--------|--------|--------|--------|--------|--------|--------|
|                                        | R      | TS     | R      | TS     | R      | TS     | R      | TS     |
| $\Delta E_{\text{int}}$                | -42.4  | -57.8  | -46.6  | -59.2  | -42.0  | -54.1  | -35.9  | -51.9  |
| $\Delta\Delta E_{\text{int}}$          | -15.4  |        | -12.6  |        | -12.0  |        | -16.0  |        |
| $\Delta\Delta\Delta E_{\text{int}}$    | -2.9   |        |        |        | 4.0    |        |        |        |
| $\Delta E_{\text{Pauli}}$              | 173.6  | 314.3  | 203.7  | 320.4  | 202.3  | 320.8  | 204.3  | 302.7  |
| $\Delta\Delta E_{\text{Pauli}}$        | 140.7  |        | 116.7  |        | 118.5  |        | 98.4   |        |
| $\Delta\Delta\Delta E_{\text{Pauli}}$  | 24.0   |        |        |        | 20.1   |        |        |        |
| $\Delta E_{\text{disp}}$               | -23.1  | -36.2  | -23.4  | -41.0  | -23.9  | -37.6  | -25.5  | -36.3  |
| $\Delta\Delta E_{\text{disp}}$         | -13.1  |        | -17.6  |        | -13.7  |        | -10.8  |        |
| $\Delta\Delta\Delta E_{\text{disp}}$   | 4.5    |        |        |        | -2.9   |        |        |        |
| $\Delta E_{\text{elstat}}$             | -114.6 | -177.8 | -133.4 | -179.5 | -130.0 | -170.1 | -129.5 | -172.5 |
| $\Delta\Delta E_{\text{elstat}}$       | -63.2  |        | -46.1  |        | -49.1  |        | -42.9  |        |
| $\Delta\Delta\Delta E_{\text{elstat}}$ | -17.1  |        |        |        | -6.3   |        |        |        |
| $\Delta E_{\text{pol}}$                | -17.1  | -47.3  | -22.5  | -47.0  | -23.0  | -47.4  | -22.5  | -43.8  |
| $\Delta\Delta E_{\text{pol}}$          | -30.2  |        | -24.4  |        | -24.5  |        | -21.2  |        |
| $\Delta\Delta\Delta E_{\text{pol}}$    | -5.8   |        |        |        | -3.3   |        |        |        |
| $\Delta E_{\text{CT}}$                 | -61.2  | -110.3 | -71.3  | -112.2 | -67.5  | -110.7 | -62.8  | -102.2 |
| $\Delta\Delta E_{\text{CT}}$           | -49.1  |        | -40.8  |        | -43.3  |        | -39.4  |        |
| $\Delta\Delta\Delta E_{\text{CT}}$     | -8.3   |        |        |        | -3.9   |        |        |        |

**Table S4.** Summary of electronic energies of computed structures.  $E_{\text{SMD}}$  is the single-point energies corrected with a SMD solvation model in toluene.

| System            | $E$ (Hartree)<br>M06L/SDD/def2-SVP | $E_{\text{SMD}}$ (Hartree)<br>M06L-D3/SDD/def2-TZVP | Imaginary<br>frequencies<br>( $\text{cm}^{-1}$ ) |
|-------------------|------------------------------------|-----------------------------------------------------|--------------------------------------------------|
| cc                | -3865.511870                       | -                                                   | -                                                |
| c1                | -3472.7988366                      | -3472.822819                                        | -                                                |
| c1a-R             | -3551.3556915                      | -3551.394292                                        | -                                                |
| c1a-TS            | -3551.339550                       | -3551.378246                                        | -427.5675                                        |
| c1a-P             | -3551.3793586                      | -3551.402595                                        | -                                                |
| c1b-R             | -3629.9171549                      | -3629.939705                                        | -                                                |
| c1b-TS            | -3629.8926546                      | -3629.915559                                        | -390.9608                                        |
| c1b-P             | -3629.9304679                      | -3629.968015                                        | -                                                |
| c1b*-R            | -3629.9187541                      | -3629.941819                                        | -                                                |
| c1b*-TS           | -3629.8976328                      | -3629.920868                                        | -419.1167                                        |
| c1b*-P            | -3629.9483759                      | -3629.971884                                        | -                                                |
| c1b*-TS $\beta$ H | -3629.9363703                      | -3629.959161                                        | -414.125                                         |
| c1b*-P $\beta$ H  | -3629.947333                       | -3629.975194                                        | -                                                |
| c1b*-I            | -3629.9326007                      | -3629.957462                                        | -                                                |
| c1c-R             | -3708.4794826                      | -3708.503954                                        | -                                                |
| c1c-TS            | -3708.4583355                      | -3708.483363                                        | -398.5403                                        |
| c1c-P             | -3708.5176867                      | -3708.543002                                        | -                                                |
| c1c-TS $\beta$ H  | -3708.499430                       | -3708.5240202                                       | -395.9208                                        |
| c1c-P $\beta$ H   | -3708.507130                       | -3708.541633                                        | -                                                |
| c1c*-R            | -3708.4706383                      | -3708.494091                                        | -                                                |
| c1c*-TS           | -3708.454003                       | -3708.478353                                        | -351.9818                                        |
| c1c*-P            | -3708.5158489                      | -3708.540792                                        | -                                                |
| c1c*-TS $\beta$ H | -3708.498842                       | 3708.5227582                                        | -238.3122                                        |
| c1c*-P $\beta$ H  | -3708.507767                       | -3708.532066                                        | -                                                |

**Table S5.** Summary of enthalpies and Gibbs free energies of computed structures. Enthalpies and free energies are at 323.15 K in toluene using M06L-D3/SDD/def2-TZVP method.

| System | $H$ (Hartree) | $G$ (Hartree) |
|--------|---------------|---------------|
| c1     | -3472.122304  | -3472.2917    |
| c1a-R  | -3550.637304  | -3550.81395   |
| c1a-TS | -3550.619535  | -3550.7988    |
| c1a-P  | -3550.644407  | -3550.8152    |
| c1b-R  | -3629.120407  | -3629.3044    |

|                                   |              |              |
|-----------------------------------|--------------|--------------|
| <b>c1b-TS</b>                     | -3629.098026 | -3629.2753   |
| <b>c1b-P</b>                      | -3629.137102 | -3629.3182   |
| <b>c1b*-R</b>                     | -3629.122695 | -3629.306817 |
| <b>c1b*-TS</b>                    | -3629.103458 | -3629.279731 |
| <b>c1b*-P</b>                     | -3629.152884 | -3629.331933 |
| <b>c1b*-TS<math>\beta</math>H</b> | -3629.132603 | -3629.312038 |
| <b>c1b*-P<math>\beta</math>H</b>  | -3629.149739 | -3629.323611 |
| <b>c1b*-I</b>                     | -3629.13840  | -3629.321885 |
| <b>c1c-R</b>                      | -3707.62644  | -3707.809316 |
| <b>c1c-TS</b>                     | -3707.604325 | -3707.789226 |
| <b>c1c-P</b>                      | -3707.658561 | -3707.853853 |
| <b>c1c-TS<math>\beta</math>H</b>  | -3707.635024 | -3707.827003 |
| <b>c1c-P<math>\beta</math>H</b>   | -3707.642335 | -3707.834056 |
| <b>c1c*-R</b>                     | -3707.614975 | -3707.805227 |
| <b>c1c*-TS</b>                    | -3707.599728 | -3707.784598 |
| <b>c1c*-P</b>                     | -3707.659913 | -3707.851831 |
| <b>c1c*-TS<math>\beta</math>H</b> | -3707.636916 | -3707.82907  |
| <b>c1c*-P<math>\beta</math>H</b>  | -3707.649444 | -3707.839888 |

**Table S6.** Summary of enthalpies and Gibbs free energies of computed structures. Enthalpies and free energies are at 333.15 K in toluene using M06L-D3/SDD/def2-TZVP method.

| <b>System</b>                     | <b><i>H</i>(Hartree)</b> | <b><i>G</i>(Hartree)</b> |
|-----------------------------------|--------------------------|--------------------------|
| <b>c1</b>                         | -3472.118528             | -3472.296968             |
| <b>c1a-R</b>                      | -3550.633335             | -3550.819477             |
| <b>c1a-TS</b>                     | -3550.615539             | -3550.804436             |
| <b>c1a-P</b>                      | -3550.64053              | -3550.820504             |
| <b>c1b-R</b>                      | -3629.116213             | -3629.310132             |
| <b>c1b-TS</b>                     | -3629.09390              | -3629.280821             |
| <b>c1b-P</b>                      | -3629.132995             | -3629.323863             |
| <b>c1b*-R</b>                     | -3629.118502             | -3629.312579             |
| <b>c1b*-TS</b>                    | -3629.099336             | -3629.285249             |
| <b>c1b*-P</b>                     | -3629.151884             | -3629.336933             |
| <b>c1b*-TS<math>\beta</math>H</b> | -3629.132006             | -3629.317396             |
| <b>c1b*-P<math>\beta</math>H</b>  | -3629.145070             | -3629.330131             |
| <b>c1b*-I</b>                     | -3629.134255             | -3629.328557             |
| <b>c1c-R</b>                      | -3707.62214              | -3707.815041             |
| <b>c1c-TS</b>                     | -3707.600007             | -3707.795014             |
| <b>c1c-P</b>                      | -3707.654308             | -3707.859559             |
| <b>c1c-TS<math>\beta</math>H</b>  | -3707.631024             | -3707.833265             |
| <b>c1c-P<math>\beta</math>H</b>   | -3707.638125             | -3707.840056             |
| <b>c1c*-R</b>                     | -3707.610598             | -3707.811181             |
| <b>c1c*-TS</b>                    | -3707.595394             | -3707.790385             |



|                                   |              |              |
|-----------------------------------|--------------|--------------|
| <b>c1c*-P</b>                     | -3707.655584 | -3707.857836 |
| <b>c1c*-TS<math>\beta</math>H</b> | -3707.632599 | -3707.834521 |
| <b>c1c*-P<math>\beta</math>H</b>  | -3707.645155 | -3707.845663 |

**Table S7.** Summary of enthalpies and Gibbs free energies of computed structures. Enthalpies and free energies are at 343.15 K in toluene using M06L-D3/SDD/def2-TZVP method.

| <b>System</b>                     | <b><i>H</i>(Hartree)</b> | <b><i>G</i>(Hartree)</b> |
|-----------------------------------|--------------------------|--------------------------|
| <b>c1</b>                         | -3472.114667             | -3472.302381             |
| <b>c1a-R</b>                      | -3550.629278             | -3550.825124             |
| <b>c1a-TS</b>                     | -3550.611453             | -3550.810166             |
| <b>c1a-P</b>                      | -3550.636564             | -3550.825965             |
| <b>c1b-R</b>                      | -3629.111924             | -3629.316016             |
| <b>c1b-TS</b>                     | -3629.089679             | -3629.286494             |
| <b>c1b-P</b>                      | -3629.128794             | -3629.329654             |
| <b>c1b*-R</b>                     | -3629.114214             | -3629.318468             |
| <b>c1b*-TS</b>                    | -3629.095120             | -3629.290891             |
| <b>c1b*-P</b>                     | -3629.155884             | -3629.340933             |
| <b>c1b*-TS<math>\beta</math>H</b> | -3629,136303             | -3629,321496             |
| <b>c1b*-P<math>\beta</math>H</b>  | -3629,140774             | -3629,335611             |
| <b>c1b*-I</b>                     | -3629.130016             | -3629.334556             |
| <b>c1c-R</b>                      | -3707.617741             | -3707,820896             |
| <b>c1c-TS</b>                     | -3707.595589             | -3707.800933             |
| <b>c1c-P</b>                      | -3707.649956             | -3707.864394             |
| <b>c1c-TS<math>\beta</math>H</b>  | -3707.627561             | -3707.838521             |
| <b>c1c-P<math>\beta</math>H</b>   | -3707.634125             | -3707.844876             |
| <b>c1c*-R</b>                     | -3707.606122             | -3707.817268             |
| <b>c1c*-TS</b>                    | -3707.59096              | -3707.796304             |
| <b>c1c*-P</b>                     | -3707.651155             | -3707.863972             |
| <b>c1c*-TS<math>\beta</math>H</b> | -3707.628283             | -3707.841522             |
| <b>c1c*-P<math>\beta</math>H</b>  | -3707.640468             | -3707.852569             |

**Cartesian Coordinates**

cc  
Ni 2.89689700 -0.48292600 1.58259100  
N 1.32672300 -1.67931500 1.73622000  
N 3.35514300 -0.93488000 -0.19108600  
C 3.97816800 6.31830700 1.78793500  
H 4.60459800 7.18277100 2.06014200  
H 4.68208000 5.47086100 1.79157300  
C 3.50505100 6.51800900 0.37323000  
C 2.21641200 6.64496600 0.02644700  
H 1.92750800 6.80584900 -1.00840600  
H 1.41181300 6.61533700 0.75532200  
C 4.59800400 6.59583700 -0.64829600  
H 5.24219000 7.46727500 -0.46654400  
H 4.20097400 6.67914400 -1.66321800  
H 5.25226600 5.71467700 -0.60786900  
C 0.17909200 -3.80406300 1.23954800  
H 0.30025000 -4.63865500 0.54893600  
H -0.88403400 -3.55076500 1.23649800  
H 0.42382300 -4.14898400 2.24990100  
C 1.09519700 -2.67335700 0.85624000  
C 1.78102400 -2.77034200 -0.35075700  
H 1.50818200 -3.61384100 -0.97636400  
C 2.77812400 -1.91507500 -0.87894200  
C 3.22594300 -2.19584400 -2.28696600  
H 4.14405800 -2.79668600 -2.28611700  
H 3.45486000 -1.27805100 -2.83619300  
H 2.46223200 -2.75191300 -2.83170800  
C 0.43482700 -1.41430400 2.76440400  
C -0.94996800 -1.13051500 2.56762200  
C -1.78679200 -0.77115200 3.64851400  
H -2.83303300 -0.56584600 3.44469300  
C 0.08333200 -0.95009700 5.14264100  
H 0.49090000 -0.89626400 6.14849800  
C 0.90483700 -1.32827800 4.09129900  
C 4.31793000 -0.10943000 -0.85585300  
C 3.93625200 1.17814500 -1.31528700  
C 4.89709100 1.97689000 -1.94249200  
H 4.61686800 2.96634200 -2.29469500  
C 6.20634200 1.53391500 -2.10557000  
C 6.57154800 0.28173100 -1.62561800  
H 7.59729300 -0.05616300 -1.74636600  
C 5.64687900 -0.55963900 -0.99400600  
C 2.91177500 6.11056400 2.85596200  
H 3.38147000 6.21708400 3.84282500  
H 2.17981200 6.92686500 2.78914900  
C 2.17600600 4.77262200 2.79057600  
H 1.73796400 4.65084100 1.79117000  
H 1.32823300 4.79196800 3.48866000  
C 2.54106100 1.72331200 -1.09829800  
H 2.18726300 1.30901200 -0.13910200  
C 6.10360200 -1.88913600 -0.42464400  
H 5.24525300 -2.57531100 -0.42875500

|   |             |             |             |
|---|-------------|-------------|-------------|
| C | 2.52380400  | 3.24231600  | -0.97342300 |
| H | 2.72027300  | 3.74402900  | -1.92965300 |
| H | 1.53930200  | 3.58630000  | -0.63755900 |
| H | 3.26768900  | 3.60871100  | -0.25280200 |
| C | 1.55149000  | 1.25523400  | -2.16431000 |
| H | 0.55846700  | 1.68405000  | -1.98356800 |
| C | 6.53758700  | -1.73538700 | 1.03426500  |
| H | 7.34828500  | -1.00133700 | 1.12170300  |
| C | -1.26931100 | -0.65717500 | 4.92571600  |
| H | 5.70455800  | -1.39745500 | 1.65569200  |
| H | 6.90017900  | -2.68682900 | 1.43768400  |
| C | 7.22135400  | -2.54002000 | -1.23480600 |
| H | 7.40842500  | -3.55548700 | -0.87403300 |
| H | 1.86797100  | 1.56066000  | -3.16850700 |
| H | 1.44322000  | 0.16555800  | -2.16438500 |
| H | 6.98012100  | -2.59458000 | -2.30161100 |
| H | 8.16609700  | -1.99335300 | -1.13477100 |
| H | 6.94028800  | 2.16738500  | -2.59539500 |
| H | 1.94547900  | -1.58592400 | 4.27230900  |
| C | 3.04635200  | 3.55820000  | 3.08470700  |
| H | 3.89031000  | 3.53588900  | 2.38041200  |
| H | 3.50406900  | 3.65013900  | 4.08150300  |
| C | 2.29293700  | 2.23658600  | 2.96857600  |
| H | 1.78901400  | 2.19778700  | 1.99063800  |
| H | 1.49953200  | 2.18191200  | 3.72713600  |
| H | 4.23390200  | 1.70493600  | 1.24340300  |
| C | 4.18184500  | 0.88028100  | 1.95677200  |
| H | 5.17256400  | 0.49221700  | 2.19450100  |
| H | 2.62522000  | 0.06736400  | 3.19808600  |
| C | 3.23426200  | 1.04237000  | 3.08947100  |
| H | 3.71055900  | 1.02304000  | 4.08300100  |
| C | -1.61605300 | -1.24592500 | 1.33655000  |
| N | -2.32614600 | -1.30086400 | 0.41993800  |
| B | -3.39245400 | -1.35234900 | -0.77324300 |
| C | -4.43452400 | -0.09355400 | -0.60079400 |
| C | -4.51274600 | 0.83364100  | 0.44345200  |
| C | -5.44483400 | 0.01638000  | -1.56829700 |
| C | -5.51147500 | 1.81330800  | 0.52534500  |
| C | -6.45681400 | 0.97640000  | -1.52913500 |
| C | -6.48984200 | 1.88561100  | -0.46653500 |
| C | -4.23018600 | -2.74966500 | -0.47864100 |
| C | -4.53481000 | -3.73050200 | -1.42994300 |
| C | -4.73137600 | -3.00113100 | 0.80946700  |
| C | -5.25749200 | -4.89065400 | -1.12819400 |
| C | -5.45310100 | -4.14535100 | 1.15512900  |
| C | -5.71769500 | -5.10169000 | 0.17309000  |
| C | -2.38587500 | -1.32093800 | -2.08028100 |
| C | -2.24254800 | -0.23078700 | -2.94945400 |
| C | -1.46413100 | -2.36114700 | -2.28977100 |
| C | -1.27560400 | -0.17400100 | -3.96073000 |
| C | -0.50377900 | -2.35530600 | -3.30136700 |
| C | -0.39732400 | -1.24202800 | -4.13806300 |
| F | -5.51081400 | -5.79483200 | -2.07834400 |
| F | -6.40923700 | -6.20103600 | 0.47587600  |
| F | -5.89492000 | -4.32898800 | 2.40380100  |

|   |             |             |             |
|---|-------------|-------------|-------------|
| F | -4.51883100 | -2.10567600 | 1.80093800  |
| F | -4.13583800 | -3.59304100 | -2.70373900 |
| F | -1.46422300 | -3.43291400 | -1.47101100 |
| F | 0.33932200  | -3.38776600 | -3.45252300 |
| F | 0.55252400  | -1.19068700 | -5.07393600 |
| F | -1.15858900 | 0.91737500  | -4.72239900 |
| F | -3.02221000 | 0.85586300  | -2.82544700 |
| F | -7.38604900 | 1.03491400  | -2.48613400 |
| F | -5.44259000 | -0.84122700 | -2.60590200 |
| F | -7.44662700 | 2.81289300  | -0.40493700 |
| F | -5.53580200 | 2.67640800  | 1.54733100  |
| F | -3.60818600 | 0.82643500  | 1.44762900  |
| H | -1.90770700 | -0.35858700 | 5.74981600  |

**c1**

|    |             |             |             |
|----|-------------|-------------|-------------|
| Ni | -0.30118900 | 0.46976200  | 0.62747400  |
| N  | 0.17815400  | -0.00557900 | 2.43931600  |
| N  | 1.38320700  | 0.05129500  | -0.09572600 |
| C  | 1.67284700  | -0.10655200 | 4.37602100  |
| H  | 2.72653300  | 0.08192000  | 4.60992400  |
| H  | 1.40315900  | -1.08559800 | 4.79812200  |
| H  | 1.05912900  | 0.63755200  | 4.90418300  |
| C  | 1.42226600  | -0.03143200 | 2.89827900  |
| C  | 2.53326700  | 0.02106900  | 2.03552300  |
| H  | 3.51720100  | 0.05158500  | 2.50273700  |
| C  | 2.50957000  | -0.02246200 | 0.64187100  |
| C  | -0.89031500 | -0.41358900 | 3.27941300  |
| C  | -1.01478900 | -1.76571900 | 3.67216500  |
| C  | -2.08135800 | -2.10264700 | 4.51363500  |
| H  | -2.19730000 | -3.13643300 | 4.84612500  |
| C  | -3.01109900 | -1.15213800 | 4.92822400  |
| H  | -3.82883400 | -1.44332900 | 5.59111500  |
| C  | -2.91595000 | 0.16101100  | 4.47341500  |
| H  | -3.66723000 | 0.89656500  | 4.76994300  |
| C  | -1.86593300 | 0.53977800  | 3.63792400  |
| C  | -0.08544200 | -2.82442800 | 3.10545200  |
| H  | 0.94091200  | -2.42081700 | 3.10141200  |
| C  | -0.44619000 | -3.10706800 | 1.64649600  |
| H  | 0.24972200  | -3.83375700 | 1.20088900  |
| H  | -0.41230800 | -2.19227000 | 1.03255200  |
| H  | -1.46134700 | -3.52462900 | 1.56498800  |
| C  | -0.05142000 | -4.11025000 | 3.91550200  |
| H  | 0.71631300  | -4.79205500 | 3.52416000  |
| H  | -1.00766900 | -4.65297800 | 3.87154000  |
| H  | 0.17644800  | -3.92600800 | 4.97561800  |
| C  | -1.74524200 | 1.90160100  | 3.00267000  |
| H  | -0.69754800 | 2.21845700  | 3.14272900  |
| C  | -2.64224600 | 2.97527200  | 3.58823900  |
| H  | -2.45219200 | 3.94477800  | 3.10918100  |
| H  | -2.47139200 | 3.09586500  | 4.66724400  |
| H  | -3.70889100 | 2.74898200  | 3.43943900  |
| C  | -1.95921700 | 1.76139600  | 1.48585600  |
| H  | -1.30186700 | 2.41352300  | 0.88881200  |
| H  | -2.98516600 | 2.01381000  | 1.17369800  |

|   |             |             |             |
|---|-------------|-------------|-------------|
| H | -1.94643000 | 0.67450100  | 1.14001400  |
| C | 1.47556400  | -0.09199200 | -1.48961900 |
| C | 1.71761900  | -1.32358400 | -2.10445600 |
| C | 1.77621100  | -1.42726800 | -3.49206100 |
| H | 1.95357900  | -2.40413500 | -3.94770700 |
| C | 1.35910000  | 0.93177800  | -3.72930100 |
| H | 1.20088900  | 1.82231900  | -4.34029400 |
| C | 1.59674100  | -0.30666900 | -4.30859100 |
| H | 1.83737600  | -2.20621900 | -1.47226800 |
| C | 1.30683600  | 1.03842600  | -2.32827100 |
| C | 1.02381500  | 2.28569000  | -1.72996700 |
| N | 0.75795000  | 3.32453400  | -1.29319100 |
| C | 3.82993800  | -0.10496000 | -0.06963000 |
| H | 3.96724400  | -1.07261500 | -0.57329500 |
| H | 3.91748600  | 0.66544300  | -0.84998000 |
| H | 4.66011100  | 0.02425100  | 0.63234500  |
| H | 1.63309600  | -0.40225200 | -5.39451500 |
| B | 0.06821500  | 4.68198200  | -0.87263100 |
| H | -0.82862100 | 0.75084900  | -0.72732000 |
| C | 0.89526900  | 5.84974300  | -1.64720300 |
| C | 2.28366700  | 5.89599800  | -1.50963500 |
| C | 0.33061500  | 6.86866700  | -2.41380100 |
| C | 3.08307800  | 6.87075400  | -2.10151300 |
| C | 1.09291000  | 7.86692600  | -3.02136600 |
| C | 2.47673100  | 7.86699600  | -2.86380000 |
| C | -1.45543700 | 4.41207800  | -1.40705700 |
| C | -1.64311900 | 4.05772600  | -2.74699900 |
| C | -2.60841300 | 4.35802300  | -0.62534600 |
| C | -2.86196600 | 3.66222500  | -3.28622700 |
| C | -3.84962800 | 3.94951800  | -1.11712400 |
| C | -3.98079600 | 3.60177600  | -2.45663100 |
| C | 0.21621600  | 4.89692400  | 0.73238200  |
| C | 0.80938300  | 4.02781400  | 1.64436900  |
| C | -0.26610700 | 6.08835500  | 1.27883500  |
| C | 0.90094100  | 4.29559500  | 3.01088500  |
| C | -0.19495200 | 6.40036400  | 2.63317700  |
| C | 0.39358500  | 5.48940400  | 3.51104200  |
| F | 0.51267900  | 8.81727900  | -3.74457200 |
| F | 3.21285100  | 8.80924700  | -3.43567200 |
| F | 4.40231800  | 6.86432200  | -1.94397700 |
| F | 2.90586000  | 4.96473100  | -0.77176900 |
| F | -0.98907500 | 6.93541100  | -2.59721300 |
| F | -0.68766900 | 7.54146500  | 3.09831300  |
| F | 0.45897400  | 5.75635900  | 4.80764000  |
| F | -0.87364100 | 6.96995600  | 0.47981000  |
| F | 1.44415500  | 3.40128700  | 3.83640400  |
| F | 1.31292800  | 2.84966100  | 1.24977900  |
| F | -0.59461400 | 4.07066800  | -3.58674100 |
| F | -2.96780700 | 3.33120200  | -4.56751000 |
| F | -5.15066900 | 3.21194100  | -2.93939000 |
| F | -4.89664300 | 3.86845600  | -0.30217300 |
| F | -2.58709800 | 4.66560200  | 0.67761800  |

c1a-R

|    |             |             |             |
|----|-------------|-------------|-------------|
| Ni | -0.24267800 | 0.08008700  | 0.34739000  |
| N  | 0.03518700  | -0.02162600 | 2.32394700  |
| N  | 1.63002900  | 0.03766800  | -0.06941100 |
| C  | 1.38210200  | -0.23764100 | 4.38406000  |
| H  | 2.08112800  | 0.49510900  | 4.80989700  |
| H  | 1.82462300  | -1.22997300 | 4.56392900  |
| H  | 0.44061800  | -0.19238200 | 4.94060300  |
| C  | 1.22414800  | -0.00823100 | 2.90636900  |
| C  | 2.43526200  | 0.17106200  | 2.19942600  |
| H  | 3.32846700  | 0.29395800  | 2.81273100  |
| C  | 2.63264400  | 0.16981900  | 0.82801900  |
| C  | -1.10258400 | -0.37669600 | 3.10624900  |
| C  | -1.40643800 | -1.75274000 | 3.24885500  |
| C  | -2.59121900 | -2.10726100 | 3.89916000  |
| H  | -2.84835800 | -3.16349300 | 4.00969400  |
| C  | -3.45033600 | -1.13907800 | 4.41298500  |
| H  | -4.37574600 | -1.43594800 | 4.91135100  |
| C  | -3.11206300 | 0.20419200  | 4.30954500  |
| H  | -3.77042700 | 0.96021000  | 4.74582000  |
| C  | -1.93644900 | 0.61476400  | 3.66800900  |
| C  | -0.48208000 | -2.82483600 | 2.69492400  |
| H  | 0.54217900  | -2.41626300 | 2.69848100  |
| C  | -0.80891400 | -3.16542900 | 1.24289000  |
| H  | -0.15390400 | -3.96595100 | 0.86826700  |
| H  | -0.67796200 | -2.29720300 | 0.57516400  |
| H  | -1.85034600 | -3.50761100 | 1.13611000  |
| C  | -0.45911000 | -4.08474100 | 3.55018800  |
| H  | 0.33291100  | -4.76694000 | 3.21049100  |
| H  | -1.40326800 | -4.64651300 | 3.49188400  |
| H  | -0.27509800 | -3.85836800 | 4.61047600  |
| C  | -1.56034400 | 2.08501100  | 3.67364000  |
| H  | -0.77069900 | 2.22322300  | 2.91484200  |
| C  | -0.97251500 | 2.48674600  | 5.02661300  |
| H  | -0.71047400 | 3.55439200  | 5.04257100  |
| H  | -0.06343400 | 1.92578100  | 5.27636600  |
| H  | -1.70278600 | 2.31629100  | 5.83275500  |
| C  | -2.72455200 | 3.01290100  | 3.33908000  |
| H  | -2.36399200 | 4.04014900  | 3.18062800  |
| H  | -3.45428200 | 3.05877700  | 4.16120900  |
| H  | -3.27415800 | 2.71612400  | 2.43516900  |
| C  | 1.96624000  | -0.09573500 | -1.42555100 |
| C  | 2.58226100  | -1.24201700 | -1.94106500 |
| C  | 2.85059200  | -1.36066500 | -3.30153600 |
| H  | 3.31650900  | -2.27517900 | -3.67585200 |
| C  | 1.91508500  | 0.81535500  | -3.71955200 |
| H  | 1.63780000  | 1.62929800  | -4.39227000 |
| C  | 2.51861900  | -0.33844500 | -4.19667900 |
| H  | 2.82113500  | -2.05652200 | -1.25364100 |

|   |             |             |             |
|---|-------------|-------------|-------------|
| C | 1.64856900  | 0.93845300  | -2.34372300 |
| C | 1.03726000  | 2.11387700  | -1.85482700 |
| N | 0.55799500  | 3.10549100  | -1.49858200 |
| C | 4.03155200  | 0.39168900  | 0.32761500  |
| H | 4.44623000  | -0.48797700 | -0.18396400 |
| H | 4.05775200  | 1.21652800  | -0.40117600 |
| H | 4.70611000  | 0.64677100  | 1.15140200  |
| H | 2.72474600  | -0.44668300 | -5.26221400 |
| B | -0.13799300 | 4.47065400  | -1.13603000 |
| H | -0.44163000 | 0.00448400  | -1.08477600 |
| C | -1.91407200 | 1.15883400  | 0.28417000  |
| H | -1.89141400 | 1.72517000  | -0.65198500 |
| H | -1.94280500 | 1.76030000  | 1.19609700  |
| C | -2.26639500 | -0.18617800 | 0.29714900  |
| H | -2.61328100 | -0.67210600 | 1.21263900  |
| H | -2.52131500 | -0.70173500 | -0.63275500 |
| C | 0.72839600  | 5.60197500  | -1.93322100 |
| C | 2.11593100  | 5.62343000  | -1.77419800 |
| C | 0.19954600  | 6.61783600  | -2.72959700 |
| C | 2.94596200  | 6.56817400  | -2.37229400 |
| C | 0.99369300  | 7.58661900  | -3.34460500 |
| C | 2.37437300  | 7.56094100  | -3.16522700 |
| C | -1.65866600 | 4.23929300  | -1.67921300 |
| C | -1.84501800 | 3.90789300  | -3.02381900 |
| C | -2.81890900 | 4.23333800  | -0.90561200 |
| C | -3.08184700 | 3.61143400  | -3.58676300 |
| C | -4.08129600 | 3.94001000  | -1.42473600 |
| C | -4.21398300 | 3.62552500  | -2.77329000 |
| C | 0.02009700  | 4.75777100  | 0.45587400  |
| C | 0.69898600  | 3.96951600  | 1.37974200  |
| C | -0.48112500 | 5.96092800  | 0.95768600  |
| C | 0.87492100  | 4.33305800  | 2.71514500  |
| C | -0.34890400 | 6.35754200  | 2.28497000  |
| C | 0.33861800  | 5.53046000  | 3.17426200  |
| F | 0.44551900  | 8.53335200  | -4.09654700 |
| F | 3.13961900  | 8.47475000  | -3.74486200 |
| F | 4.26199700  | 6.53611400  | -2.19179400 |
| F | 2.71077500  | 4.69685800  | -1.00541900 |
| F | -1.11436700 | 6.71149800  | -2.93937000 |
| F | -0.86482000 | 7.50366000  | 2.71207600  |
| F | 0.47092600  | 5.88034700  | 4.44769300  |
| F | -1.14794600 | 6.77796700  | 0.13654700  |
| F | 1.53034500  | 3.52722000  | 3.54858800  |
| F | 1.23306500  | 2.79567400  | 1.02328500  |
| F | -0.78299200 | 3.86201400  | -3.84397300 |
| F | -3.19359400 | 3.30616400  | -4.87418300 |
| F | -5.40281000 | 3.33543900  | -3.28029200 |
| F | -5.14796300 | 3.93062100  | -0.63410100 |

F -2.77850700 4.46544700 0.40983000

**c1a-TS**

Ni -2.30942700 1.17614200 0.87869500  
N -3.28790900 0.32631100 -0.51510000  
N -1.53470000 2.56142900 -0.23879400  
C -4.03685500 -0.09125400 -2.80523800  
H -3.74732400 0.16593200 -3.83023800  
H -5.10826400 0.13300800 -2.68415100  
H -3.94306100 -1.17705200 -2.67680000  
C -3.21290700 0.66116300 -1.80100900  
C -2.43064400 1.72129200 -2.29874700  
H -2.42726700 1.84677300 -3.38027200  
C -1.68607400 2.64415600 -1.57165500  
C -4.28593200 -0.61972300 -0.12162300  
C -5.57554900 -0.12621800 0.18851300  
C -6.51731900 -1.01296400 0.71761300  
H -7.51443400 -0.64756500 0.97573200  
C -6.20875800 -2.35521700 0.92170100  
H -6.95392900 -3.03193300 1.34581100  
C -4.95634700 -2.83301400 0.55783300  
H -4.72866300 -3.89550400 0.68524600  
C -3.97692600 -1.98799700 0.02122800  
C -5.93068600 1.33734300 -0.02060700  
H -5.30085100 1.71821400 -0.84241700  
C -5.60350500 2.18464900 1.20693200  
H -5.89149200 3.23508100 1.05006500  
H -4.52457600 2.16968700 1.43476200  
H -6.14026600 1.82130900 2.09768500  
C -7.38073900 1.53972700 -0.44002800  
H -7.55577900 2.58427900 -0.73449500  
H -8.08571500 1.32097300 0.37593500  
H -7.65601800 0.90083400 -1.29174300  
C -2.65935100 -2.59131800 -0.43406800  
H -2.00619800 -1.76813000 -0.77686200  
C -2.90088000 -3.54407300 -1.60626500  
H -1.97024100 -4.01782600 -1.94248200  
H -3.34780300 -3.04727700 -2.47838300  
H -3.58318800 -4.35684600 -1.31458900  
C -1.92139500 -3.33757000 0.67476000  
H -0.93784300 -3.68387500 0.32015700  
H -2.47586400 -4.23158900 0.99853500  
H -1.74740500 -2.71912600 1.56370000  
C -0.85778800 3.58487200 0.43120100  
C -1.42113600 4.84345700 0.68120000  
C -0.72835200 5.79901100 1.41782400  
H -1.19738900 6.76649500 1.61180700  
C 1.14790900 4.31254900 1.68021000  
H 2.15041300 4.08339700 2.04724200  
C 0.55178100 5.53999200 1.92386200  
H -2.42723100 5.04571000 0.30674000  
C 0.44903600 3.34608900 0.93280600  
C 1.04443000 2.10624500 0.62011500  
N 1.55546700 1.10788300 0.33709300



|   |             |             |             |
|---|-------------|-------------|-------------|
| C | -0.99844600 | 3.74480000  | -2.32504400 |
| H | -1.47895600 | 4.72023200  | -2.15604800 |
| H | 0.05071100  | 3.85413100  | -2.01408100 |
| H | -1.01151700 | 3.54861100  | -3.40263600 |
| H | 1.07962100  | 6.29792900  | 2.50404100  |
| B | 2.26960300  | -0.25012900 | -0.02924100 |
| H | -1.49456800 | 1.86181100  | 2.05373300  |
| C | -2.07809700 | 0.96986500  | 3.00211000  |
| H | -2.54617500 | 1.73211400  | 3.63749800  |
| H | -1.12618300 | 0.61031100  | 3.41238900  |
| C | -2.92453500 | 0.03254500  | 2.31787300  |
| H | -2.55819000 | -0.98984400 | 2.18676800  |
| H | -4.00792900 | 0.09949800  | 2.46628300  |
| C | 2.24256000  | -1.07449200 | 1.37799500  |
| C | 1.01649000  | -1.26315000 | 2.01418600  |
| C | 3.34025300  | -1.63938700 | 2.02501500  |
| C | 0.86011600  | -1.93986100 | 3.21838300  |
| C | 3.23129200  | -2.33338900 | 3.23237500  |
| C | 1.98448800  | -2.48539600 | 3.83409700  |
| C | 3.75204700  | 0.18458800  | -0.53863000 |
| C | 4.50514200  | 1.10301800  | 0.19555800  |
| C | 4.37687100  | -0.31799900 | -1.68034000 |
| C | 5.78045900  | 1.52362400  | -0.16550200 |
| C | 5.65576400  | 0.07466100  | -2.08084200 |
| C | 6.35995400  | 1.00392400  | -1.32149900 |
| C | 1.34404800  | -0.93824800 | -1.17803900 |
| C | 0.72712300  | -0.19827600 | -2.18816200 |
| C | 1.16967900  | -2.31938300 | -1.26436200 |
| C | -0.04692400 | -0.76980200 | -3.19726700 |
| C | 0.42666700  | -2.93437300 | -2.26867200 |
| C | -0.21099100 | -2.15201800 | -3.22740100 |
| F | 4.30702800  | -2.85029400 | 3.81269700  |
| F | 4.56650800  | -1.55045900 | 1.50620600  |
| F | 1.86950500  | -3.13605800 | 4.98214600  |
| F | -0.34180300 | -2.06725200 | 3.77820200  |
| F | -0.10176700 | -0.77815400 | 1.44549200  |
| F | 1.76309100  | -3.13856400 | -0.38934100 |
| F | 0.31377500  | -4.25917200 | -2.30539200 |
| F | -0.94537800 | -2.71731800 | -4.17594500 |
| F | -0.60427400 | -0.02093700 | -4.14436200 |
| F | 0.90925500  | 1.12987100  | -2.25627400 |
| F | 3.77885500  | -1.22973500 | -2.45147300 |
| F | 6.20466500  | -0.43315000 | -3.17741400 |
| F | 7.57354700  | 1.38753700  | -1.68921700 |
| F | 6.44703000  | 2.40176900  | 0.57593400  |
| F | 4.01018700  | 1.60269400  | 1.34173800  |

**c1a-P**

|    |             |             |             |
|----|-------------|-------------|-------------|
| Ni | -2.44976500 | 1.06737200  | 0.90513000  |
| N  | -3.30748000 | 0.03401800  | -0.38483700 |
| N  | -1.65659200 | 2.35737900  | -0.30604600 |
| C  | -3.87488100 | -0.73205100 | -2.62920000 |
| H  | -3.54981200 | -0.59148800 | -3.66637400 |
| H  | -4.96487900 | -0.58110300 | -2.58663800 |
| H  | -3.70441100 | -1.78078100 | -2.34991700 |

|   |             |             |             |
|---|-------------|-------------|-------------|
| C | -3.16304200 | 0.20680300  | -1.69829400 |
| C | -2.41469400 | 1.24683900  | -2.28615000 |
| H | -2.38015300 | 1.25410000  | -3.37641700 |
| C | -1.75425900 | 2.29425300  | -1.64290300 |
| C | -4.29262400 | -0.88644800 | 0.09172900  |
| C | -5.60580500 | -0.40146200 | 0.29336200  |
| C | -6.53679000 | -1.24795300 | 0.90156600  |
| H | -7.55343100 | -0.88852700 | 1.08015200  |
| C | -6.19324300 | -2.54234000 | 1.28334800  |
| H | -6.93136400 | -3.18532500 | 1.76801800  |
| C | -4.91564400 | -3.02015300 | 1.01894300  |
| H | -4.65843200 | -4.04920100 | 1.28681400  |
| C | -3.94714300 | -2.21471700 | 0.40813600  |
| C | -5.99967500 | 1.00724200  | -0.12049000 |
| H | -5.33613200 | 1.30661600  | -0.94970400 |
| C | -5.77732500 | 2.01755300  | 1.00256100  |
| H | -6.09156300 | 3.02622200  | 0.69431800  |
| H | -4.71447100 | 2.07508300  | 1.29012300  |
| H | -6.35306500 | 1.74864700  | 1.90230400  |
| C | -7.42869900 | 1.08981000  | -0.64099100 |
| H | -7.62600000 | 2.08053300  | -1.07458600 |
| H | -8.17236700 | 0.94174200  | 0.15624200  |
| H | -7.62706800 | 0.33812600  | -1.41873000 |
| C | -2.58714500 | -2.80244800 | 0.08508900  |
| H | -2.01834200 | -2.04724700 | -0.48289000 |
| C | -2.71202600 | -4.04774100 | -0.78924100 |
| H | -1.71949600 | -4.40237200 | -1.09898900 |
| H | -3.29559100 | -3.86237500 | -1.70238900 |
| H | -3.20345400 | -4.87138300 | -0.24957700 |
| C | -1.78841300 | -3.12895800 | 1.34163000  |
| H | -0.82075600 | -3.58255200 | 1.08188000  |
| H | -2.32585900 | -3.84265500 | 1.98557800  |
| H | -1.58558300 | -2.23387600 | 1.94294000  |
| C | -1.07409800 | 3.46140600  | 0.31843700  |
| C | -1.76203400 | 4.66291800  | 0.54211600  |
| C | -1.17317200 | 5.69498200  | 1.26504500  |
| H | -1.73436800 | 6.61688000  | 1.43432400  |
| C | 0.83397700  | 4.39992800  | 1.57856200  |
| H | 1.84418400  | 4.27446600  | 1.97224300  |
| C | 0.11960800  | 5.56853600  | 1.78957100  |
| H | -2.77850500 | 4.75758200  | 0.15254100  |
| C | 0.24367200  | 3.35673700  | 0.84082000  |
| C | 0.93089000  | 2.15479800  | 0.57219400  |
| N | 1.45103300  | 1.15290500  | 0.32255000  |
| C | -1.09673800 | 3.35250800  | -2.47791700 |
| H | -1.43933000 | 4.36046100  | -2.20296700 |
| H | -0.00405300 | 3.34546000  | -2.33921300 |
| H | -1.29428500 | 3.20610000  | -3.54456900 |
| H | 0.56394100  | 6.38363000  | 2.36219300  |
| B | 2.07409300  | -0.20875100 | -0.16170200 |
| C | -3.04093000 | 0.23473700  | 2.50971800  |
| H | -2.61161700 | -0.75812900 | 2.69397800  |
| H | -4.12894200 | 0.22843100  | 2.65716600  |
| C | 1.84881800  | -1.31599900 | 1.00734600  |
| C | 1.00718500  | -1.19306300 | 2.10885700  |

|   |             |             |             |
|---|-------------|-------------|-------------|
| C | 2.56012800  | -2.51617900 | 0.94081500  |
| C | 0.88883300  | -2.16603400 | 3.09942800  |
| C | 2.47057300  | -3.51944900 | 1.90188400  |
| C | 1.62652100  | -3.33942300 | 2.99783000  |
| C | 3.66428900  | 0.10236400  | -0.33809600 |
| C | 4.36016000  | 0.73157000  | 0.69478600  |
| C | 4.42996400  | -0.25268600 | -1.44817700 |
| C | 5.72322900  | 1.01389800  | 0.64631600  |
| C | 5.79737900  | 0.00753200  | -1.53863400 |
| C | 6.44734800  | 0.64632200  | -0.48521800 |
| C | 1.25132300  | -0.47196300 | -1.54543100 |
| C | 1.24138200  | 0.52492800  | -2.52493100 |
| C | 0.46309100  | -1.58565200 | -1.83103600 |
| C | 0.49836200  | 0.45447700  | -3.69637100 |
| C | -0.31276600 | -1.69148200 | -2.98820600 |
| C | -0.30233600 | -0.66170700 | -3.92003700 |
| F | 3.16764600  | -4.64259300 | 1.78280600  |
| F | 3.34492500  | -2.75385100 | -0.11485000 |
| F | 1.51434200  | -4.28545400 | 3.91903600  |
| F | 0.03441700  | -1.99537500 | 4.10541400  |
| F | 0.21545100  | -0.11560000 | 2.26561100  |
| F | 0.40471500  | -2.62766400 | -0.99666000 |
| F | -1.08561500 | -2.75444100 | -3.18876100 |
| F | -1.08128700 | -0.71884900 | -4.99334800 |
| F | 0.49232300  | 1.45874100  | -4.56877100 |
| F | 1.97572100  | 1.63478700  | -2.34316900 |
| F | 3.87578400  | -0.88114700 | -2.48621000 |
| F | 6.48565900  | -0.35093500 | -2.61559200 |
| F | 7.74577300  | 0.90178800  | -0.55843800 |
| F | 6.33221100  | 1.62220400  | 1.65887600  |
| F | 3.70775700  | 1.09740200  | 1.81092300  |
| C | -2.28776600 | 1.38741500  | 3.09058300  |
| H | -1.75331400 | 1.91309000  | 2.32708600  |
| H | -2.90118900 | 2.14032300  | 3.53973900  |
| H | -1.49038700 | 1.10736700  | 3.74683000  |

**c1b-R**

|    |             |             |            |
|----|-------------|-------------|------------|
| Ni | 0.40322600  | -0.78585200 | 0.64023900 |
| N  | 0.01016000  | 0.47898800  | 2.17103800 |
| N  | 2.26933400  | -0.06248200 | 0.48172400 |
| C  | 0.58564800  | 1.56877000  | 4.30680200 |
| H  | 1.46504000  | 1.96417500  | 4.82491500 |
| H  | 0.09127200  | 0.87387600  | 5.00072200 |
| H  | -0.11979600 | 2.39520800  | 4.13536700 |
| C  | 0.97119000  | 0.90900500  | 3.01197100 |
| C  | 2.32735100  | 0.84390300  | 2.71643500 |
| H  | 2.99848400  | 1.24998000  | 3.47182100 |
| C  | 2.92099400  | 0.52532200  | 1.47386700 |
| C  | 4.35781900  | 0.94465600  | 1.34137400 |
| H  | 4.53054800  | 1.90540800  | 1.84249100 |
| H  | 4.69021500  | 1.02668600  | 0.30079200 |
| H  | 5.00317700  | 0.21048400  | 1.84946900 |
| C  | -1.31817200 | 0.66729200  | 2.53275300 |
| C  | -1.91959000 | -0.17082000 | 3.51019100 |
| C  | -3.27642800 | -0.05015600 | 3.86253900 |

|   |             |             |             |
|---|-------------|-------------|-------------|
| C | -3.48284500 | 1.72648100  | 2.24813300  |
| H | -4.10045200 | 2.47619900  | 1.74806100  |
| C | -2.13996300 | 1.61099700  | 1.90227500  |
| C | 2.83377100  | -0.10171700 | -0.82897900 |
| C | 3.85772300  | -1.00667600 | -1.19373100 |
| C | 4.26423800  | -1.04072400 | -2.53432300 |
| H | 5.04778800  | -1.74387100 | -2.83127100 |
| C | 3.69902500  | -0.20759600 | -3.48991000 |
| C | 2.71767000  | 0.70432200  | -3.11047500 |
| H | 2.29310000  | 1.37708500  | -3.85932300 |
| C | 2.27281400  | 0.77867500  | -1.78880500 |
| C | 1.34404100  | -3.11311800 | 1.18821000  |
| H | 2.03255700  | -2.48260400 | 1.77903100  |
| H | 1.85810800  | -4.08417100 | 1.05690500  |
| C | 0.98608600  | -2.46178300 | -0.11497400 |
| H | 0.20215100  | -2.99580300 | -0.66964400 |
| H | 1.83383500  | -2.28416500 | -0.78563400 |
| C | 4.56217800  | -1.92678800 | -0.20924200 |
| H | 4.11762200  | -1.76706900 | 0.78946900  |
| C | 1.27093400  | 1.83729700  | -1.36782600 |
| H | 0.67132500  | 1.40827600  | -0.54686400 |
| C | 4.39975600  | -3.40571200 | -0.55606100 |
| H | 4.91167100  | -3.65041500 | -1.49915700 |
| H | 4.84712600  | -4.03520700 | 0.22671000  |
| H | 3.35105600  | -3.70745300 | -0.67023300 |
| C | 6.05628000  | -1.60837900 | -0.13319700 |
| H | 6.54882600  | -2.21947900 | 0.63520100  |
| C | 0.31025300  | 2.25140800  | -2.47168100 |
| H | 0.80852200  | 2.82756500  | -3.26605100 |
| C | -4.05533800 | 0.90558500  | 3.22852500  |
| H | -0.17255200 | 1.38552200  | -2.94755100 |
| H | -0.48385600 | 2.89865500  | -2.07036700 |
| C | 1.98807700  | 3.05541700  | -0.78853100 |
| H | 1.26833700  | 3.80789300  | -0.43179800 |
| H | 6.55031200  | -1.83308500 | -1.09054200 |
| H | 6.26171700  | -0.55456500 | 0.09313000  |
| H | 2.63225200  | 2.79027400  | 0.06143000  |
| H | 2.62497500  | 3.53777800  | -1.54626800 |
| H | 4.02971900  | -0.25901000 | -4.52961500 |
| H | -1.69571800 | 2.25668700  | 1.14046200  |
| C | -1.49149700 | -1.45350500 | 0.38630700  |
| H | -1.50262700 | -2.54436100 | 0.31675100  |
| H | -2.20304700 | -1.04974600 | 1.10934200  |
| C | -1.05038300 | -0.66422500 | -0.68175000 |
| H | -1.35519000 | 0.38819100  | -0.74215000 |
| H | -0.71333600 | -1.09720700 | -1.62959500 |
| C | -1.12822400 | -1.20035600 | 4.05632000  |
| N | -0.50359600 | -2.07649800 | 4.48198100  |
| B | 0.22479300  | -3.30014100 | 5.14856000  |
| H | -5.10966500 | 1.00956700  | 3.48767200  |
| C | -0.59022500 | -4.64868800 | 4.73689600  |
| C | -1.55922100 | -4.77887800 | 3.74379700  |
| C | -0.30974300 | -5.81720200 | 5.44847200  |
| C | -2.22296000 | -5.97737200 | 3.47705200  |
| C | -0.94226500 | -7.03405000 | 5.21581000  |

|   |             |             |             |
|---|-------------|-------------|-------------|
| C | -1.91658200 | -7.11148100 | 4.22187100  |
| C | 0.04577800  | -3.02406600 | 6.75104700  |
| C | 1.06672800  | -3.09928900 | 7.69887900  |
| C | -1.22035900 | -2.72916800 | 7.26100900  |
| C | 0.85538700  | -2.88099800 | 9.06050600  |
| C | -1.47672700 | -2.50021900 | 8.61079500  |
| C | -0.42418200 | -2.57818800 | 9.51936000  |
| C | 1.75492200  | -3.22100100 | 4.58997800  |
| C | 2.47893300  | -2.03540900 | 4.74360900  |
| C | 2.41784700  | -4.22899900 | 3.89008100  |
| C | 3.76112000  | -1.83932500 | 4.24014800  |
| C | 3.70203600  | -4.07599400 | 3.36524400  |
| C | 4.36972800  | -2.86837200 | 3.52476700  |
| F | -2.53625700 | -8.25797500 | 3.98074300  |
| F | -0.62659500 | -8.11422200 | 5.91919000  |
| F | -3.14071500 | -6.04128100 | 2.51761700  |
| F | -1.90407400 | -3.73999400 | 2.96127000  |
| F | 0.65380500  | -5.80175400 | 6.37589400  |
| F | 1.83105100  | -5.39827800 | 3.62222200  |
| F | 4.25689400  | -5.05522200 | 2.65792600  |
| F | 5.57632100  | -2.69047400 | 2.99912300  |
| F | 4.41417100  | -0.69572900 | 4.42820100  |
| F | 1.93542900  | -1.01719800 | 5.42659700  |
| F | 2.31449700  | -3.40257800 | 7.33789100  |
| F | 1.86100400  | -2.96453900 | 9.92279000  |
| F | -0.63908400 | -2.36723200 | 10.80983000 |
| F | -2.70351600 | -2.21519900 | 9.03459900  |
| F | -2.27773900 | -2.65627800 | 6.43180900  |
| H | 0.46128400  | -3.31837700 | 1.81585300  |
| H | -3.69517200 | -0.71867300 | 4.61730200  |

**c1b-TS**

|    |            |             |             |
|----|------------|-------------|-------------|
| Ni | 3.80872300 | 1.03881600  | -1.27007700 |
| N  | 3.54796200 | 2.69680000  | -0.34119700 |
| N  | 4.84820400 | 0.21357800  | 0.21080400  |
| C  | 3.43842900 | 4.23896200  | 1.56185200  |
| H  | 3.84475200 | 4.35676200  | 2.57237300  |
| H  | 2.33948400 | 4.27181200  | 1.64236400  |
| H  | 3.72907300 | 5.11739000  | 0.96745300  |
| C  | 3.89739100 | 2.95397700  | 0.93450400  |
| C  | 4.65597400 | 2.08683100  | 1.71206500  |
| H  | 4.90473900 | 2.43494200  | 2.71424800  |
| C  | 5.15899500 | 0.81541300  | 1.35125400  |
| C  | 6.09129600 | 0.15410200  | 2.32849500  |
| H  | 6.28791500 | 0.79630000  | 3.19338900  |
| H  | 7.04905900 | -0.11132600 | 1.86062700  |
| H  | 5.67558200 | -0.79266200 | 2.69650600  |
| C  | 2.83008300 | 3.65230100  | -1.07028900 |
| C  | 1.41180400 | 3.63431900  | -1.06040900 |
| C  | 0.64925400 | 4.51754500  | -1.84909500 |
| C  | 2.70061200 | 5.49698600  | -2.64303000 |
| H  | 3.21285500 | 6.23763400  | -3.26169400 |
| C  | 3.45270200 | 4.62208700  | -1.86689700 |
| C  | 5.55317200 | -0.98295200 | -0.10174400 |
| C  | 5.06934100 | -2.25196400 | 0.29413200  |

|   |             |             |             |
|---|-------------|-------------|-------------|
| C | 5.88348200  | -3.36693000 | 0.05758500  |
| H | 5.54118300  | -4.35304400 | 0.38298100  |
| C | 7.11218300  | -3.25240200 | -0.58098000 |
| C | 7.53636900  | -2.00767600 | -1.03605500 |
| H | 8.48718200  | -1.92723200 | -1.56922100 |
| C | 6.77251400  | -0.85794500 | -0.81548000 |
| C | 1.65880100  | -0.75165900 | -2.63697800 |
| H | 1.03467700  | 0.12818800  | -2.41955500 |
| H | 1.07038100  | -1.63235800 | -2.33723500 |
| C | 2.95879800  | -0.72489500 | -1.88218000 |
| H | 3.56880300  | -1.63019900 | -2.00412700 |
| H | 2.73921500  | -0.62410400 | -0.80233000 |
| C | 3.69926200  | -2.46052400 | 0.92466300  |
| H | 3.13875600  | -1.52060000 | 0.81156600  |
| C | 7.26229100  | 0.48935300  | -1.32695700 |
| H | 6.36965400  | 1.13092900  | -1.45417000 |
| C | 2.93166400  | -3.56364100 | 0.19839000  |
| H | 3.42865100  | -4.53988300 | 0.29493900  |
| H | 1.92820200  | -3.69309700 | 0.62211800  |
| H | 2.82096800  | -3.36336900 | -0.87733000 |
| C | 3.73133400  | -2.76158100 | 2.42111800  |
| H | 2.70930500  | -2.92617200 | 2.79592100  |
| C | 7.95187300  | 0.37982600  | -2.68272800 |
| H | 8.94486800  | -0.08801100 | -2.60512800 |
| C | 1.30120600  | 5.44419100  | -2.64702500 |
| H | 7.37159200  | -0.21465900 | -3.40389900 |
| H | 8.10933700  | 1.37695100  | -3.11874800 |
| C | 8.17508900  | 1.21336700  | -0.33883400 |
| H | 8.58788000  | 2.12692700  | -0.79182900 |
| H | 4.31484200  | -3.66874200 | 2.64263500  |
| H | 4.15209900  | -1.93675000 | 3.00994900  |
| H | 7.65001400  | 1.52070700  | 0.57438300  |
| H | 9.02616700  | 0.57985100  | -0.04327900 |
| H | 7.73108800  | -4.13747400 | -0.74427100 |
| H | 4.54429400  | 4.66062400  | -1.87519600 |
| C | 3.60195600  | 1.68815300  | -3.07721200 |
| H | 2.60553800  | 1.87155900  | -3.50166900 |
| H | 4.29066900  | 2.53253400  | -3.19206600 |
| C | 4.12724800  | 0.34885800  | -3.11932000 |
| H | 5.21266600  | 0.21317100  | -3.01943800 |
| H | 3.73714700  | -0.36711000 | -3.84798400 |
| C | 0.77583600  | 2.72474900  | -0.19108700 |
| N | 0.23054400  | 2.03391900  | 0.56064700  |
| B | -0.48374900 | 1.21528600  | 1.69238600  |
| H | 0.72447200  | 6.13178000  | -3.26694700 |
| C | -0.49828700 | -0.34315400 | 1.20444800  |
| C | -0.91539600 | -0.63568100 | -0.09534800 |
| C | -0.19708200 | -1.45291100 | 1.99619600  |
| C | -0.99913900 | -1.92741200 | -0.60931400 |
| C | -0.27797000 | -2.76173000 | 1.52412200  |
| C | -0.66359700 | -3.00162400 | 0.20842200  |
| C | -2.03365000 | 1.69554100  | 1.80493000  |
| C | -2.81017600 | 1.08221800  | 2.79013000  |
| C | -2.71191200 | 2.59972500  | 0.99148800  |
| C | -4.16238300 | 1.34300900  | 2.98350100  |

|   |             |             |             |
|---|-------------|-------------|-------------|
| C | -4.06916300 | 2.88939600  | 1.14352100  |
| C | -4.79888000 | 2.25727200  | 2.14509100  |
| C | 0.44957900  | 1.53985900  | 2.99108100  |
| C | 0.10090300  | 2.39104400  | 4.04103500  |
| C | 1.72841900  | 0.98486400  | 3.07762900  |
| C | 0.93881300  | 2.63655600  | 5.13111700  |
| C | 2.58215100  | 1.17641200  | 4.15801000  |
| C | 2.18656400  | 2.02340800  | 5.19067500  |
| F | -0.68736400 | -4.23972000 | -0.26410500 |
| F | 0.06361200  | -3.78254800 | 2.30474500  |
| F | -1.36868900 | -2.13886900 | -1.86932600 |
| F | -1.26701900 | 0.36203000  | -0.92190500 |
| F | 0.19399100  | -1.31465800 | 3.26378200  |
| F | 2.17030200  | 0.19790800  | 2.08857500  |
| F | 3.76513100  | 0.57028100  | 4.22036700  |
| F | 2.99177100  | 2.23929400  | 6.22115800  |
| F | 0.55730300  | 3.45317900  | 6.10611200  |
| F | -1.07304500 | 3.02749900  | 4.05534200  |
| F | -2.22906900 | 0.20825100  | 3.62028400  |
| F | -4.84690200 | 0.73645000  | 3.94535300  |
| F | -6.08742600 | 2.52451900  | 2.30323600  |
| F | -4.66699000 | 3.76240500  | 0.33920900  |
| F | -2.08507800 | 3.25343800  | -0.00075000 |
| H | 1.77705500  | -0.81466200 | -3.72884600 |
| H | -0.43991600 | 4.46319000  | -1.81613500 |

**c1b-P**

|    |            |             |             |
|----|------------|-------------|-------------|
| Ni | 3.74847100 | 0.80045700  | -0.87591300 |
| N  | 3.59494400 | 2.57389500  | -0.35058600 |
| N  | 5.06559500 | 0.33850100  | 0.39844300  |
| C  | 3.63608300 | 4.42138600  | 1.24867100  |
| H  | 4.12079000 | 4.71395500  | 2.18595700  |
| H  | 2.54691200 | 4.48829000  | 1.40257900  |
| H  | 3.88815600 | 5.17070400  | 0.48442100  |
| C  | 4.04422700 | 3.03628900  | 0.83561500  |
| C  | 4.84278800 | 2.30298900  | 1.71233500  |
| H  | 5.09703600 | 2.78349100  | 2.65726100  |
| C  | 5.39635300 | 1.02476400  | 1.47730800  |
| C  | 6.38744600 | 0.46873800  | 2.45392200  |
| H  | 6.36740600 | 1.01820200  | 3.40131200  |
| H  | 7.41326200 | 0.51727400  | 2.05700800  |
| H  | 6.18633600 | -0.59209400 | 2.65980600  |
| C  | 2.93150000 | 3.42277300  | -1.24739700 |
| C  | 1.52305400 | 3.56137900  | -1.20269200 |
| C  | 0.82513000 | 4.35082100  | -2.13610600 |
| C  | 2.93164000 | 4.90767000  | -3.16375700 |
| H  | 3.49062200 | 5.43948600  | -3.93708900 |
| C  | 3.61990300 | 4.12119500  | -2.24583800 |
| C  | 5.78668000 | -0.79709300 | -0.04202100 |
| C  | 5.14922600 | -2.06069900 | -0.05419700 |
| C  | 5.88370900 | -3.16273400 | -0.50387800 |
| H  | 5.42250700 | -4.15216700 | -0.50631100 |
| C  | 7.19157600 | -3.02316200 | -0.95648000 |
| C  | 7.77803500 | -1.76194800 | -1.01086100 |
| H  | 8.78749200 | -1.65846400 | -1.41499000 |

|   |             |             |             |
|---|-------------|-------------|-------------|
| C | 7.08843000  | -0.62698000 | -0.57821900 |
| C | 3.70883000  | -2.21913500 | 0.40438200  |
| H | 3.15816400  | -1.29985600 | 0.09829400  |
| C | 7.65678900  | 0.76277800  | -0.79765400 |
| H | 7.33637500  | 1.40852900  | 0.03558700  |
| C | 3.01265800  | -3.40191100 | -0.25205800 |
| H | 3.41097600  | -4.36246800 | 0.10670200  |
| H | 1.94299800  | -3.41028500 | -0.01380900 |
| H | 3.11221400  | -3.39319700 | -1.34762300 |
| C | 3.60340600  | -2.29590200 | 1.92400400  |
| H | 2.55516700  | -2.39295300 | 2.24273900  |
| C | 7.05515600  | 1.36384800  | -2.06868500 |
| H | 7.33470800  | 0.77402900  | -2.95522400 |
| C | 1.53646700  | 5.02248500  | -3.11760200 |
| H | 5.95241400  | 1.38950800  | -2.02012600 |
| H | 7.40609500  | 2.39488700  | -2.22705600 |
| C | 9.17616900  | 0.80720600  | -0.83937500 |
| H | 9.53082500  | 1.84657500  | -0.87733300 |
| H | 4.15170900  | -3.16980000 | 2.30812900  |
| H | 4.00899600  | -1.39823200 | 2.40741900  |
| H | 9.62679000  | 0.33313200  | 0.04481000  |
| H | 9.58331600  | 0.30326200  | -1.72862500 |
| H | 7.74779000  | -3.89967900 | -1.29620100 |
| H | 4.70602800  | 4.01854400  | -2.29488000 |
| C | 2.40907700  | 0.61703600  | -2.21849600 |
| H | 1.45620400  | 0.42092600  | -1.68289900 |
| H | 2.22677100  | 1.44878700  | -2.91838300 |
| C | 0.82767600  | 2.86181700  | -0.19855900 |
| N | 0.23748000  | 2.30303700  | 0.62384500  |
| B | -0.53632000 | 1.42633000  | 1.66520600  |
| H | 1.00892200  | 5.63458600  | -3.85028500 |
| C | -0.56016300 | -0.06199300 | 0.98630600  |
| C | -0.94989200 | -0.18575800 | -0.34885700 |
| C | -0.23682900 | -1.25814700 | 1.62639000  |
| C | -0.98466500 | -1.39612000 | -1.03555300 |
| C | -0.26327200 | -2.49256800 | 0.97875500  |
| C | -0.61774100 | -2.55960000 | -0.36625600 |
| C | -2.07155200 | 1.94369200  | 1.77363300  |
| C | -2.92226100 | 1.22843200  | 2.61843100  |
| C | -2.67399000 | 2.97150900  | 1.05247400  |
| C | -4.27675700 | 1.50592500  | 2.76615900  |
| C | -4.03046700 | 3.28272400  | 1.16278700  |
| C | -4.83686700 | 2.54453400  | 2.02310700  |
| C | 0.37476100  | 1.56636400  | 3.01058900  |
| C | -0.01460200 | 2.18764100  | 4.19720300  |
| C | 1.68161200  | 1.07049300  | 2.99892200  |
| C | 0.81828000  | 2.28023000  | 5.31517300  |
| C | 2.53835100  | 1.12756100  | 4.09258800  |
| C | 2.10186800  | 1.74765000  | 5.26186200  |
| F | -0.58510800 | -3.71838200 | -1.01057000 |
| F | 0.08958000  | -3.60090400 | 1.62372300  |
| F | -1.33510100 | -1.44461100 | -2.31610300 |
| F | -1.30583600 | 0.90457100  | -1.04548500 |
| F | 0.13055400  | -1.27541400 | 2.90942700  |
| F | 2.14649000  | 0.47885500  | 1.88899100  |



|   |             |             |             |
|---|-------------|-------------|-------------|
| F | 3.76047200  | 0.60029900  | 4.04940500  |
| F | 2.90575000  | 1.82702900  | 6.31281700  |
| F | 0.39715900  | 2.88019400  | 6.42207200  |
| F | -1.22287100 | 2.73883800  | 4.32740400  |
| F | -2.41550800 | 0.23112900  | 3.35235800  |
| F | -5.03502600 | 0.79858600  | 3.59476500  |
| F | -6.12648000 | 2.82903200  | 2.13874900  |
| F | -4.55565900 | 4.27460400  | 0.45070000  |
| F | -1.96901000 | 3.72817100  | 0.19568500  |
| H | -0.26246500 | 4.41822200  | -2.07406000 |
| C | 2.89770700  | -0.61913500 | -2.97103800 |
| H | 3.53572400  | -1.33072600 | -2.38934100 |
| C | 1.76372400  | -1.49240700 | -3.51429800 |
| H | 1.19354800  | -1.89903300 | -2.66120100 |
| H | 1.04582200  | -0.85773300 | -4.06058600 |
| C | 2.24954000  | -2.62455600 | -4.39320100 |
| H | 1.42107900  | -3.25655000 | -4.74087100 |
| H | 2.77369900  | -2.24913400 | -5.28466700 |
| H | 2.95631100  | -3.27762900 | -3.85814400 |
| H | 3.55799300  | -0.30181900 | -3.79617800 |

**c1b\*-R**

|    |             |             |             |
|----|-------------|-------------|-------------|
| Ni | -1.87761100 | -2.61115600 | -0.68452700 |
| N  | -1.91082200 | -2.70919200 | 1.32081300  |
| N  | 0.10748000  | -2.85809300 | -0.74065100 |
| C  | -1.00710600 | -2.64723100 | 3.60945900  |
| H  | -0.04577400 | -2.73499000 | 4.12748600  |
| H  | -1.67447800 | -3.44224700 | 3.97033100  |
| H  | -1.47597500 | -1.70396500 | 3.92720300  |
| C  | -0.84090100 | -2.69185600 | 2.11481100  |
| C  | 0.48369000  | -2.73416300 | 1.63521300  |
| H  | 1.26054600  | -2.75688200 | 2.39962200  |
| C  | 0.93350900  | -2.84176900 | 0.31864100  |
| C  | -3.17539900 | -2.83696800 | 1.96485800  |
| C  | -3.74883100 | -4.12415600 | 2.07029500  |
| C  | -4.98496800 | -4.24841500 | 2.71329700  |
| H  | -5.44614500 | -5.23474400 | 2.80703100  |
| C  | -5.63953600 | -3.13674200 | 3.23417900  |
| H  | -6.60092600 | -3.25406800 | 3.73917300  |
| C  | -5.07096600 | -1.87344900 | 3.10033600  |
| H  | -5.59688800 | -1.00369600 | 3.50139500  |
| C  | -3.83817300 | -1.69552500 | 2.46509900  |
| C  | -3.04427900 | -5.33645300 | 1.48512200  |
| H  | -2.45478100 | -4.97407800 | 0.62136700  |
| C  | -4.00778700 | -6.39551600 | 0.96688200  |
| H  | -3.46499400 | -7.17248300 | 0.40939200  |
| H  | -4.76904600 | -5.97205500 | 0.29509900  |
| H  | -4.53885900 | -6.90913100 | 1.78233700  |
| C  | -2.04759400 | -5.95465500 | 2.46281000  |
| H  | -1.57953200 | -6.85234000 | 2.03235200  |
| H  | -2.54523300 | -6.25746600 | 3.39727000  |
| H  | -1.23578600 | -5.26371300 | 2.72600400  |
| C  | -3.25389200 | -0.31145400 | 2.25803000  |
| H  | -2.15549800 | -0.40816500 | 2.26229200  |
| C  | -3.62395900 | 0.68962800  | 3.33964600  |

|   |             |             |             |
|---|-------------|-------------|-------------|
| H | -3.06934500 | 1.62669700  | 3.19541800  |
| H | -3.38613900 | 0.31582000  | 4.34621500  |
| H | -4.69453100 | 0.94298300  | 3.32073300  |
| C | -3.63798100 | 0.19835000  | 0.87295000  |
| H | -3.13804300 | 1.14958300  | 0.63138200  |
| H | -4.72556800 | 0.35523300  | 0.79588800  |
| H | -3.35867700 | -0.53776100 | 0.10636900  |
| C | 0.64374800  | -2.98268500 | -2.02308500 |
| C | 0.47291400  | -4.15754900 | -2.76819400 |
| C | 0.95852200  | -4.26223500 | -4.06665800 |
| H | 0.81775600  | -5.19619100 | -4.61547800 |
| C | 1.80078200  | -2.01019100 | -3.98266200 |
| H | 2.29421600  | -1.15019200 | -4.43944700 |
| C | 1.62506800  | -3.19373800 | -4.67972100 |
| H | -0.04661800 | -4.99257200 | -2.29431900 |
| C | 1.31575600  | -1.90417600 | -2.66425100 |
| C | 1.41682400  | -0.68001000 | -1.97397700 |
| N | 1.45907600  | 0.32863500  | -1.40851600 |
| C | 2.41467800  | -3.00229700 | 0.11336900  |
| H | 2.63731800  | -3.88032200 | -0.51094600 |
| H | 2.86713600  | -2.13809800 | -0.39443100 |
| H | 2.93892600  | -3.11512700 | 1.06890700  |
| H | 1.99622500  | -3.28640900 | -5.70113900 |
| B | 1.42905000  | 1.63699700  | -0.54297200 |
| C | -3.06308800 | -0.57425600 | -2.62586400 |
| H | -3.55020500 | -1.28393900 | -3.31061400 |
| H | -3.82113700 | -0.21214200 | -1.91862800 |
| C | -1.83952600 | -1.14000600 | -1.97168200 |
| H | -1.09345200 | -1.40159100 | -2.73391500 |
| H | -1.39176000 | -0.44329800 | -1.23612300 |
| C | -3.74453000 | -3.10363800 | -1.10054600 |
| H | -4.37632500 | -2.26337000 | -1.39801500 |
| H | -4.16236300 | -3.70061400 | -0.28586900 |
| C | -2.82945700 | -3.67920800 | -2.00819100 |
| H | -2.49907700 | -4.71622100 | -1.85695900 |
| H | -2.73661200 | -3.32929500 | -3.04243500 |
| C | 0.13467800  | 2.52557000  | -0.97088200 |
| C | -0.68423900 | 2.33914000  | -2.08409500 |
| C | -0.15158000 | 3.65887500  | -0.20663100 |
| C | -1.76145600 | 3.17519300  | -2.38387800 |
| C | -1.21706600 | 4.51548500  | -0.46340100 |
| C | -2.03486500 | 4.26593700  | -1.56497700 |
| C | 2.76907600  | 2.48976800  | -0.91200300 |
| C | 3.11204900  | 2.68975200  | -2.25023500 |
| C | 3.59049900  | 3.12826400  | 0.01803200  |
| C | 4.20173400  | 3.45287900  | -2.66195000 |
| C | 4.68930500  | 3.90565900  | -0.34977800 |
| C | 4.99721100  | 4.06810700  | -1.69801200 |
| C | 1.41489200  | 1.00789200  | 0.96601000  |
| C | 2.52143000  | 0.25386100  | 1.36677900  |
| C | 0.38678800  | 1.08401900  | 1.90484900  |
| C | 2.64030100  | -0.35445500 | 2.60957600  |
| C | 0.47564200  | 0.51314100  | 3.17694400  |
| C | 1.60243800  | -0.22003700 | 3.52675700  |
| F | 3.35851300  | 3.01849500  | 1.32747100  |

|   |             |             |             |
|---|-------------|-------------|-------------|
| F | 5.44319200  | 4.48952800  | 0.57364500  |
| F | 6.03820100  | 4.80299000  | -2.06197000 |
| F | 4.48391400  | 3.60205500  | -3.95169900 |
| F | 2.36476000  | 2.13343800  | -3.21762100 |
| F | -2.51865400 | 2.94126600  | -3.45261200 |
| F | -0.47075500 | 1.33595300  | -2.94932200 |
| F | -3.05293300 | 5.06890000  | -1.83811500 |
| F | -1.45601000 | 5.56378600  | 0.31433000  |
| F | 0.61808700  | 3.93905500  | 0.84993600  |
| F | -0.75783000 | 1.72067700  | 1.63848700  |
| F | -0.52677700 | 0.63328700  | 4.04309600  |
| F | 1.67143400  | -0.82737100 | 4.70428800  |
| F | 3.69212900  | -1.11251800 | 2.90657500  |
| F | 3.54792300  | 0.09066500  | 0.51791500  |
| H | -2.77187500 | 0.29168500  | -3.24278200 |

**c1b\*-TS**

|    |             |             |             |
|----|-------------|-------------|-------------|
| Ni | -2.78037300 | 1.26108400  | 0.77881500  |
| N  | -3.33823500 | -0.09132200 | -0.48875700 |
| N  | -1.69132100 | 2.25485800  | -0.58236400 |
| C  | -3.34338300 | -1.40182300 | -2.56628100 |
| H  | -3.01710100 | -1.30283700 | -3.60742200 |
| H  | -4.43367500 | -1.53133000 | -2.55287500 |
| H  | -2.93129700 | -2.34453400 | -2.17480500 |
| C  | -2.89652100 | -0.22661100 | -1.73744600 |
| C  | -2.01933100 | 0.67997600  | -2.36707400 |
| H  | -1.78129800 | 0.46678900  | -3.40925400 |
| C  | -1.47135900 | 1.84874800  | -1.84357300 |
| C  | -4.33593300 | -1.01934900 | -0.06238000 |
| C  | -5.69478600 | -0.65435700 | -0.18921600 |
| C  | -6.66702300 | -1.57045000 | 0.22500800  |
| H  | -7.72468900 | -1.30992900 | 0.13818800  |
| C  | -6.31026100 | -2.80826400 | 0.74997400  |
| H  | -7.08309600 | -3.51290100 | 1.06526400  |
| C  | -4.96643400 | -3.14680800 | 0.87353300  |
| H  | -4.69802100 | -4.12251300 | 1.28440200  |
| C  | -3.95429700 | -2.26841300 | 0.47100400  |
| C  | -6.08934900 | 0.70714900  | -0.73927200 |
| H  | -5.27162700 | 1.40471600  | -0.47424100 |
| C  | -7.37197900 | 1.24663000  | -0.11914600 |
| H  | -7.53029700 | 2.29522800  | -0.40908800 |
| H  | -7.35479200 | 1.20184200  | 0.97997400  |
| H  | -8.26074700 | 0.69137200  | -0.45480500 |
| C  | -6.19664000 | 0.71835500  | -2.26264900 |
| H  | -6.54867400 | 1.69689700  | -2.62129900 |
| H  | -6.91292800 | -0.03946600 | -2.61676800 |
| H  | -5.23429900 | 0.52544300  | -2.75399000 |
| C  | -2.49003900 | -2.64517600 | 0.61438400  |
| H  | -1.95480400 | -2.21691600 | -0.25032200 |
| C  | -2.24658000 | -4.14623900 | 0.59669100  |
| H  | -1.17112800 | -4.35795100 | 0.53775300  |
| H  | -2.72785800 | -4.63080500 | -0.26544200 |
| H  | -2.62243100 | -4.63633200 | 1.50753500  |
| C  | -1.87185400 | -2.00664600 | 1.85486800  |
| H  | -0.81756800 | -2.29993300 | 1.96708600  |

|   |             |             |             |
|---|-------------|-------------|-------------|
| H | -2.40709900 | -2.30679600 | 2.76995000  |
| H | -1.90959800 | -0.90756700 | 1.79044100  |
| C | -1.08131200 | 3.41618400  | -0.11895100 |
| C | -1.81425400 | 4.59067100  | 0.10797000  |
| C | -1.21155400 | 5.72014800  | 0.64920600  |
| H | -1.80710000 | 6.62330600  | 0.80151900  |
| C | 0.90219000  | 4.57829200  | 0.79816900  |
| H | 1.95825800  | 4.54146600  | 1.07276800  |
| C | 0.14558200  | 5.72063400  | 0.99855400  |
| H | -2.87276900 | 4.59341700  | -0.16158400 |
| C | 0.29446200  | 3.43463500  | 0.24277300  |
| C | 1.03617100  | 2.24595500  | 0.09477700  |
| N | 1.63292100  | 1.25804300  | 0.01154300  |
| C | -0.63361000 | 2.69521900  | -2.75967200 |
| H | -0.99723900 | 3.73342600  | -2.78457600 |
| H | 0.41808300  | 2.74375100  | -2.44070600 |
| H | -0.63701800 | 2.30196300  | -3.78218700 |
| H | 0.60518700  | 6.61158500  | 1.42830700  |
| B | 2.36264000  | -0.12499400 | -0.11834600 |
| C | -1.57236400 | 1.24235400  | 3.73205900  |
| H | -2.23416900 | 1.69942600  | 4.48197400  |
| H | -1.81661400 | 0.17267800  | 3.68200400  |
| C | -1.63652800 | 1.91697900  | 2.38852000  |
| H | -1.31961300 | 2.96760600  | 2.43182800  |
| H | -0.95963800 | 1.38544000  | 1.68846200  |
| C | -4.16249500 | 0.98445100  | 2.10791700  |
| H | -3.98445200 | 0.25303400  | 2.90602700  |
| H | -5.12938000 | 0.85989800  | 1.61790800  |
| C | -3.60836700 | 2.30406300  | 2.25526500  |
| H | -3.99597100 | 3.08328800  | 1.57832700  |
| H | -3.42276100 | 2.74500800  | 3.23998800  |
| C | 2.30763100  | -0.88685800 | 1.31792700  |
| C | 1.82902200  | -0.38143100 | 2.52429900  |
| C | 2.85683000  | -2.16869600 | 1.38816900  |
| C | 1.83159500  | -1.11291100 | 3.71303900  |
| C | 2.87853200  | -2.93712300 | 2.54739500  |
| C | 2.35725100  | -2.40076300 | 3.72478500  |
| C | 3.92121900  | 0.20464000  | -0.46396500 |
| C | 4.60708600  | 1.16189800  | 0.28518800  |
| C | 4.67969100  | -0.45791800 | -1.42963800 |
| C | 5.95073000  | 1.47337700  | 0.09322700  |
| C | 6.02935200  | -0.18218300 | -1.65185000 |
| C | 6.66744600  | 0.79154200  | -0.88771000 |
| C | 1.51809700  | -0.81688400 | -1.33265800 |
| C | 1.49785900  | -0.16761700 | -2.57004500 |
| C | 0.73184100  | -1.96542100 | -1.26056500 |
| C | 0.77410400  | -0.61151900 | -3.66899800 |
| C | -0.00042500 | -2.45681200 | -2.34394400 |
| C | 0.01085100  | -1.76960900 | -3.55133100 |
| F | 4.13578300  | -1.40362200 | -2.19696500 |
| F | 6.70919100  | -0.83779000 | -2.58449600 |
| F | 7.94770300  | 1.06749400  | -1.09034900 |
| F | 6.55054800  | 2.40148000  | 0.83117200  |
| F | 3.96406100  | 1.83225800  | 1.25669500  |
| F | 1.34578600  | -0.58246000 | 4.83256500  |

|   |             |             |             |
|---|-------------|-------------|-------------|
| F | 1.33523000  | 0.86495000  | 2.61034600  |
| F | 2.36877100  | -3.10913600 | 4.84472400  |
| F | 3.39138700  | -4.16080900 | 2.54786200  |
| F | 3.36160200  | -2.71694500 | 0.27875800  |
| F | 0.63424300  | -2.67454200 | -0.13201600 |
| F | -0.73431400 | -3.55917700 | -2.21661000 |
| F | -0.72584700 | -2.18798900 | -4.57214700 |
| F | 0.74577000  | 0.08759600  | -4.80038000 |
| F | 2.20685700  | 0.96040900  | -2.73236700 |
| H | -0.54854000 | 1.30787400  | 4.12534100  |

**c1b\*-P**

|    |            |             |             |
|----|------------|-------------|-------------|
| Ni | 2.99634000 | 1.28771900  | -0.74392500 |
| N  | 3.38078100 | 0.05743100  | 0.61702700  |
| N  | 1.80235600 | 2.41455400  | 0.28419900  |
| C  | 3.34763000 | -0.87934400 | 2.88322800  |
| H  | 3.13408600 | -0.53044400 | 3.89997900  |
| H  | 4.41846800 | -1.11044600 | 2.80686900  |
| H  | 2.82237100 | -1.83823400 | 2.75127200  |
| C  | 2.91663000 | 0.13726700  | 1.86134600  |
| C  | 2.03241400 | 1.14581100  | 2.30607300  |
| H  | 1.76430000 | 1.10965800  | 3.36256200  |
| C  | 1.48352000 | 2.19669500  | 1.57268600  |
| C  | 4.29050600 | -0.98850600 | 0.27615700  |
| C  | 5.66564600 | -0.67552500 | 0.18061000  |
| C  | 6.55020100 | -1.69187600 | -0.19186200 |
| H  | 7.61813200 | -1.47638400 | -0.26956000 |
| C  | 6.09207900 | -2.97456800 | -0.47324600 |
| H  | 6.79714800 | -3.75754600 | -0.76132200 |
| C  | 4.73300800 | -3.25703500 | -0.39472700 |
| H  | 4.38767300 | -4.26590300 | -0.62752000 |
| C  | 3.80245600 | -2.27884200 | -0.02295600 |
| C  | 6.15995900 | 0.73398200  | 0.44792900  |
| H  | 5.38196200 | 1.41604700  | 0.04877500  |
| C  | 7.46153400 | 1.06160800  | -0.26877900 |
| H  | 7.69010000 | 2.13320300  | -0.18067700 |
| H  | 7.42036300 | 0.81514300  | -1.33986500 |
| H  | 8.31968100 | 0.52177700  | 0.15969300  |
| C  | 6.28638500 | 1.03533400  | 1.93944300  |
| H  | 6.67792200 | 2.05050000  | 2.10129200  |
| H  | 6.97882000 | 0.33299900  | 2.42923500  |
| H  | 5.32366900 | 0.97607500  | 2.46369100  |
| C  | 2.31639900 | -2.60179900 | 0.01277200  |
| H  | 1.87916700 | -2.07142300 | 0.87645900  |
| C  | 2.03758200 | -4.08496400 | 0.20867400  |
| H  | 0.96824200 | -4.25698600 | 0.37814200  |
| H  | 2.58153800 | -4.49366900 | 1.07277700  |
| H  | 2.32082600 | -4.67630500 | -0.67487300 |
| C  | 1.58327800 | -2.07338800 | -1.22033100 |
| H  | 0.52997100 | -2.38764100 | -1.20380600 |
| H  | 2.03008000 | -2.45628800 | -2.15241400 |
| H  | 1.60089900 | -0.97167000 | -1.26327600 |
| C  | 1.14635500 | 3.38841500  | -0.46516200 |
| C  | 1.82128200 | 4.52674100  | -0.93734300 |
| C  | 1.18411700 | 5.45619800  | -1.74952900 |

|   |             |             |             |
|---|-------------|-------------|-------------|
| H | 1.73575800  | 6.33623500  | -2.08824300 |
| C | -0.84985500 | 4.17303900  | -1.70020200 |
| H | -1.88604500 | 4.00111600  | -1.99826500 |
| C | -0.15313600 | 5.28766600  | -2.13408400 |
| H | 2.86422800  | 4.66137900  | -0.64103000 |
| C | -0.20721400 | 3.22777800  | -0.87391900 |
| C | -0.90566100 | 2.06254200  | -0.50071700 |
| N | -1.50738300 | 1.10895600  | -0.23976600 |
| C | 0.56494400  | 3.15437100  | 2.27434100  |
| H | 0.92416600  | 4.18926400  | 2.16811200  |
| H | -0.45640300 | 3.13930200  | 1.86805100  |
| H | 0.48344900  | 2.92338800  | 3.34173400  |
| H | -0.64204600 | 6.02280400  | -2.77447100 |
| B | -2.34151000 | -0.15405500 | 0.18368000  |
| C | 1.85053600  | 0.35135400  | -4.68583200 |
| H | 2.42954700  | 0.81608200  | -5.49772300 |
| H | 2.33389300  | -0.60739400 | -4.44751700 |
| C | 1.76246200  | 1.24546000  | -3.46820900 |
| H | 1.23673300  | 2.18302100  | -3.71776100 |
| H | 1.13802800  | 0.75642300  | -2.70366600 |
| C | 3.87529200  | 0.47330800  | -2.22235600 |
| H | 3.55063700  | -0.55256100 | -2.43488900 |
| H | 4.96961500  | 0.56574200  | -2.21351800 |
| C | 3.11005300  | 1.57628900  | -2.83942500 |
| H | 2.90005900  | 2.37953300  | -2.00460600 |
| H | 3.72401400  | 2.24549200  | -3.47077600 |
| C | -2.32604600 | -1.24223100 | -1.02368100 |
| C | -1.74679400 | -1.10276500 | -2.28219900 |
| C | -3.01063400 | -2.44077600 | -0.81355900 |
| C | -1.79184100 | -2.10015200 | -3.25713700 |
| C | -3.08202700 | -3.46359400 | -1.75323300 |
| C | -2.46512600 | -3.28797900 | -2.99206000 |
| C | -3.87062000 | 0.38233900  | 0.36702900  |
| C | -4.45390300 | 1.14043300  | -0.64935000 |
| C | -4.69973200 | 0.09132200  | 1.45020900  |
| C | -5.76515900 | 1.60699900  | -0.60836100 |
| C | -6.02080500 | 0.53309100  | 1.53076300  |
| C | -6.55585200 | 1.29640800  | 0.49590000  |
| C | -1.57595000 | -0.59434600 | 1.55697000  |
| C | -1.52538700 | 0.31894300  | 2.61359300  |
| C | -0.83869100 | -1.75962700 | 1.75539600  |
| C | -0.79835100 | 0.11677500  | 3.77975100  |
| C | -0.08700400 | -2.00286900 | 2.90734500  |
| C | -0.05403100 | -1.05174100 | 3.91902800  |
| F | -4.25444100 | -0.63560400 | 2.47566400  |
| F | -6.77133500 | 0.23301000  | 2.58346200  |
| F | -7.80805900 | 1.72546300  | 0.56105200  |
| F | -6.26510700 | 2.33374800  | -1.60224700 |
| F | -3.73440300 | 1.45190200  | -1.74190100 |
| F | -1.19488700 | -1.92117700 | -4.43269900 |
| F | -1.08432600 | 0.01271700  | -2.62435600 |
| F | -2.51864500 | -4.24599900 | -3.90629600 |
| F | -3.72864500 | -4.59246100 | -1.49044200 |
| F | -3.59861100 | -2.64960300 | 0.36908700  |
| F | -0.80606800 | -2.72601000 | 0.83352100  |

|   |             |             |             |
|---|-------------|-------------|-------------|
| F | 0.62740700  | -3.11964200 | 3.02216800  |
| F | 0.70101100  | -1.23571600 | 4.99386600  |
| F | -0.74215400 | 1.05019600  | 4.72641300  |
| F | -2.19746700 | 1.47556800  | 2.51409500  |
| H | 0.85060200  | 0.12066000  | -5.07611100 |

**c1b\*-TSβH**

|    |             |             |             |
|----|-------------|-------------|-------------|
| Ni | 3.12087400  | 1.42674500  | -0.80486200 |
| N  | 3.38956700  | 0.06514400  | 0.56872000  |
| N  | 1.84341300  | 2.44705900  | 0.22710500  |
| C  | 3.34702000  | -0.86288400 | 2.84726500  |
| H  | 3.13630600  | -0.49876000 | 3.85933700  |
| H  | 4.41645600  | -1.10087200 | 2.77329200  |
| H  | 2.81747500  | -1.82121700 | 2.73074400  |
| C  | 2.92250700  | 0.14191100  | 1.81034300  |
| C  | 2.03846700  | 1.15532700  | 2.24586100  |
| H  | 1.76106300  | 1.12386400  | 3.29996300  |
| C  | 1.50327500  | 2.20801400  | 1.50796400  |
| C  | 4.29804700  | -0.98858600 | 0.25302700  |
| C  | 5.67502100  | -0.67945700 | 0.16357800  |
| C  | 6.56171500  | -1.70147200 | -0.18757400 |
| H  | 7.63049600  | -1.48765600 | -0.25807000 |
| C  | 6.10538500  | -2.98732800 | -0.45675300 |
| H  | 6.81196900  | -3.77401800 | -0.73044900 |
| C  | 4.74585400  | -3.26799600 | -0.38286400 |
| H  | 4.40183800  | -4.27980000 | -0.60397600 |
| C  | 3.81340900  | -2.28462100 | -0.02907100 |
| C  | 6.17367400  | 0.73032200  | 0.42437200  |
| H  | 5.40163600  | 1.41592500  | 0.01907000  |
| C  | 7.47861800  | 1.05059300  | -0.28926600 |
| H  | 7.70855700  | 2.12229700  | -0.20748500 |
| H  | 7.44203900  | 0.79735700  | -1.35891400 |
| H  | 8.33392900  | 0.51192500  | 0.14623300  |
| C  | 6.29517600  | 1.03748100  | 1.91496400  |
| H  | 6.69069800  | 2.05138100  | 2.07455200  |
| H  | 6.98175200  | 0.33356800  | 2.41072600  |
| H  | 5.32984200  | 0.98451300  | 2.43524800  |
| C  | 2.32723900  | -2.60814900 | 0.00757600  |
| H  | 1.89455300  | -2.09251900 | 0.88234300  |
| C  | 2.04658200  | -4.09369000 | 0.17864500  |
| H  | 0.97730000  | -4.26702100 | 0.34651100  |
| H  | 2.59022300  | -4.51746100 | 1.03550100  |
| H  | 2.32893800  | -4.67011400 | -0.71500800 |
| C  | 1.58887200  | -2.05596500 | -1.21092200 |
| H  | 0.53148700  | -2.35587300 | -1.18924600 |
| H  | 2.02124300  | -2.43174300 | -2.15256700 |
| H  | 1.61816200  | -0.95495000 | -1.23728000 |
| C  | 1.15447000  | 3.40350800  | -0.51970800 |
| C  | 1.77690500  | 4.56695600  | -1.00240300 |
| C  | 1.08889400  | 5.47859800  | -1.79003200 |
| H  | 1.60236300  | 6.37954300  | -2.13360500 |
| C  | -0.89975500 | 4.13112300  | -1.69859100 |
| H  | -1.93704200 | 3.92299700  | -1.96907300 |
| C  | -0.25168100 | 5.26741400  | -2.14619800 |
| H  | 2.82038000  | 4.73879600  | -0.73044800 |

|   |             |             |             |
|---|-------------|-------------|-------------|
| C | -0.20476000 | 3.20474800  | -0.89025800 |
| C | -0.87171400 | 2.02763500  | -0.50349500 |
| N | -1.46834600 | 1.07271600  | -0.23358100 |
| C | 0.57000400  | 3.15485000  | 2.20734700  |
| H | 0.89952900  | 4.19658100  | 2.07791800  |
| H | -0.45804800 | 3.10604900  | 1.82260300  |
| H | 0.51312400  | 2.93633200  | 3.27916100  |
| H | -0.77893500 | 5.98806300  | -2.77247300 |
| B | -2.31808700 | -0.17556600 | 0.19564200  |
| C | 1.61262700  | 0.43741500  | -4.54561700 |
| H | 2.13893200  | 0.91537900  | -5.38454600 |
| H | 2.04070200  | -0.56788300 | -4.41984100 |
| C | 1.73332400  | 1.24871200  | -3.26520100 |
| H | 1.24199000  | 2.22841700  | -3.38699600 |
| H | 1.17745100  | 0.73403500  | -2.46538800 |
| C | 3.96501800  | 0.43378900  | -2.29008800 |
| H | 3.59491900  | -0.59527700 | -2.25292000 |
| H | 5.05580500  | 0.52657000  | -2.31910100 |
| C | 3.16388400  | 1.45871800  | -2.84122000 |
| H | 3.38817200  | 2.68040000  | -1.48274500 |
| H | 3.67788600  | 2.27878700  | -3.36000200 |
| C | -2.32956800 | -1.26642300 | -1.00871700 |
| C | -1.76206500 | -1.13541500 | -2.27324700 |
| C | -3.03060900 | -2.45379300 | -0.79043200 |
| C | -1.83504700 | -2.13116700 | -3.24824600 |
| C | -3.12998800 | -3.47456900 | -1.72967200 |
| C | -2.52529600 | -3.30766400 | -2.97574600 |
| C | -3.83796000 | 0.38522900  | 0.38467600  |
| C | -4.41031600 | 1.16620500  | -0.62051900 |
| C | -4.67027300 | 0.09278900  | 1.46496500  |
| C | -5.71390200 | 1.65298000  | -0.57102700 |
| C | -5.98422500 | 0.55377000  | 1.55334900  |
| C | -6.50825500 | 1.33970500  | 0.52981700  |
| C | -1.55404800 | -0.62569700 | 1.56613200  |
| C | -1.48927900 | 0.28705300  | 2.62213700  |
| C | -0.82264900 | -1.79552500 | 1.75774300  |
| C | -0.75057300 | 0.08190300  | 3.78044500  |
| C | -0.06079500 | -2.04271100 | 2.90211500  |
| C | -0.01193800 | -1.09112400 | 3.91308700  |
| F | -4.23406100 | -0.65393500 | 2.48001300  |
| F | -6.73818400 | 0.25104900  | 2.60284300  |
| F | -7.75343900 | 1.78758900  | 0.60245200  |
| F | -6.20307700 | 2.40151500  | -1.55401900 |
| F | -3.68837900 | 1.48126100  | -1.71099600 |
| F | -1.25026400 | -1.96123600 | -4.43117500 |
| F | -1.08436400 | -0.03036300 | -2.62023600 |
| F | -2.60551300 | -4.26390300 | -3.88986700 |
| F | -3.79132300 | -4.59319100 | -1.45994100 |
| F | -3.60796300 | -2.65241700 | 0.39911400  |
| F | -0.80402000 | -2.76111600 | 0.83422500  |
| F | 0.65041900  | -3.16240800 | 3.00946500  |
| F | 0.75033700  | -1.28069800 | 4.98184400  |
| F | -0.67760600 | 1.01698300  | 4.72426800  |
| F | -2.15569700 | 1.44726100  | 2.52911700  |
| H | 0.56061400  | 0.31236300  | -4.83226500 |



**c1b\*-PβH**

|    |             |             |             |
|----|-------------|-------------|-------------|
| Ni | 3.01352800  | 1.26850800  | -0.86812200 |
| N  | 3.45912900  | 0.03478400  | 0.61604100  |
| N  | 1.69005600  | 2.26886300  | 0.14937600  |
| C  | 3.38953600  | -0.84914800 | 2.92014800  |
| H  | 3.68960800  | -0.30599800 | 3.82733200  |
| H  | 4.21297300  | -1.50397700 | 2.61470400  |
| H  | 2.54753700  | -1.49112100 | 3.21909300  |
| C  | 2.97346200  | 0.11518000  | 1.84311000  |
| C  | 2.04190400  | 1.11349000  | 2.23433200  |
| H  | 1.78237500  | 1.11800900  | 3.29508500  |
| C  | 1.45049700  | 2.11658700  | 1.46750300  |
| C  | 4.35256500  | -1.00396200 | 0.23754100  |
| C  | 5.72922400  | -0.72197500 | 0.08416900  |
| C  | 6.56133400  | -1.73590200 | -0.40096800 |
| H  | 7.62819300  | -1.53911400 | -0.52864900 |
| C  | 6.05745200  | -2.99089800 | -0.72509000 |
| H  | 6.72441400  | -3.76915700 | -1.10239600 |
| C  | 4.70098700  | -3.25347100 | -0.56252800 |
| H  | 4.31563900  | -4.24386100 | -0.81301900 |
| C  | 3.82478300  | -2.27575400 | -0.08101600 |
| C  | 6.28581700  | 0.63848600  | 0.45031300  |
| H  | 5.51252500  | 1.37828400  | 0.17285500  |
| C  | 7.55697100  | 1.00284600  | -0.30101900 |
| H  | 7.82747400  | 2.05211200  | -0.11590600 |
| H  | 7.45109400  | 0.87162600  | -1.38784500 |
| H  | 8.41741900  | 0.39647500  | 0.02022200  |
| C  | 6.49942000  | 0.76885400  | 1.95624500  |
| H  | 6.84108800  | 1.78001500  | 2.22234100  |
| H  | 7.26107000  | 0.05652800  | 2.30963300  |
| H  | 5.57975100  | 0.57522200  | 2.52381900  |
| C  | 2.33951100  | -2.55535900 | 0.05758000  |
| H  | 1.98993800  | -2.07481700 | 0.98761800  |
| C  | 2.01157000  | -4.03594300 | 0.17843900  |
| H  | 0.95748800  | -4.17506900 | 0.44672600  |
| H  | 2.61841900  | -4.52448400 | 0.95422800  |
| H  | 2.17935700  | -4.57452700 | -0.76635000 |
| C  | 1.54742500  | -1.91807300 | -1.08130700 |
| H  | 0.48147800  | -2.16974700 | -1.00000100 |
| H  | 1.90434300  | -2.26946000 | -2.06275600 |
| H  | 1.61838500  | -0.81352400 | -1.07181400 |
| C  | 1.07138900  | 3.26964200  | -0.59361600 |
| C  | 1.79345900  | 4.35651600  | -1.11669600 |
| C  | 1.18047000  | 5.30722800  | -1.91969800 |
| H  | 1.77200900  | 6.14235000  | -2.30194900 |
| C  | -0.92749900 | 4.16240700  | -1.75503300 |
| H  | -1.98470800 | 4.04697700  | -2.00291200 |
| C  | -0.18168000 | 5.21771700  | -2.24593000 |
| H  | 2.85589200  | 4.42672200  | -0.87368500 |
| C  | -0.30826500 | 3.19509500  | -0.93402600 |
| C  | -1.04809600 | 2.07889900  | -0.50885300 |
| N  | -1.65802300 | 1.14352800  | -0.20559900 |
| C  | 0.54350300  | 3.09242200  | 2.16128300  |
| H  | 0.75681700  | 4.12468700  | 1.84781100  |

|   |             |             |             |
|---|-------------|-------------|-------------|
| H | -0.51886000 | 2.91305400  | 1.93950700  |
| H | 0.65103700  | 3.03071100  | 3.24960400  |
| H | -0.64813500 | 5.96790800  | -2.88550000 |
| B | -2.45033400 | -0.14524300 | 0.20074900  |
| C | 1.59418100  | 0.25196600  | -4.13293700 |
| H | 2.42406400  | -0.18540600 | -4.70673700 |
| H | 1.36756500  | -0.43207800 | -3.30450600 |
| C | 1.92459500  | 1.65487600  | -3.66744200 |
| H | 2.10077800  | 2.29028200  | -4.55421900 |
| H | 1.03907600  | 2.11450500  | -3.18917600 |
| C | 4.02777300  | 0.73728700  | -2.43862800 |
| H | 3.80072100  | -0.29902800 | -2.72327400 |
| H | 5.09287100  | 0.92774700  | -2.26526400 |
| C | 3.15028800  | 1.79574600  | -2.79433900 |
| H | 3.90654100  | 2.34313800  | -0.67544900 |
| H | 3.58132100  | 2.80504500  | -2.81502200 |
| C | -2.34042800 | -1.23114100 | -1.00488900 |
| C | -1.62878700 | -1.10333400 | -2.19593100 |
| C | -3.03910500 | -2.43025500 | -0.85350600 |
| C | -1.58017100 | -2.10801800 | -3.16347400 |
| C | -3.02034600 | -3.45848300 | -1.78999800 |
| C | -2.28226600 | -3.29167500 | -2.96148400 |
| C | -4.00194400 | 0.32806700  | 0.35384800  |
| C | -4.59037400 | 1.10052400  | -0.64858100 |
| C | -4.84164100 | -0.02858700 | 1.40874400  |
| C | -5.91857200 | 1.51827500  | -0.61929500 |
| C | -6.17873200 | 0.36356400  | 1.47690000  |
| C | -6.71938000 | 1.14326800  | 0.45708900  |
| C | -1.69500200 | -0.55398300 | 1.59138600  |
| C | -1.65486200 | 0.38830400  | 2.62250500  |
| C | -0.94784900 | -1.70671600 | 1.82234000  |
| C | -0.90910000 | 0.23772500  | 3.78494700  |
| C | -0.19327000 | -1.90811100 | 2.98012300  |
| C | -0.16089300 | -0.92387300 | 3.96024700  |
| F | -4.38899000 | -0.77611700 | 2.41643700  |
| F | -6.93981800 | 0.00135000  | 2.50227200  |
| F | -7.98708200 | 1.52592600  | 0.50986900  |
| F | -6.42429700 | 2.26015700  | -1.59893500 |
| F | -3.86302300 | 1.47688100  | -1.71510600 |
| F | -0.85276000 | -1.94943000 | -4.26572200 |
| F | -0.90537400 | -0.00389500 | -2.46341600 |
| F | -2.24508100 | -4.25494400 | -3.87086600 |
| F | -3.68778600 | -4.58659900 | -1.58261700 |
| F | -3.72463000 | -2.64099600 | 0.27490900  |
| F | -0.90517900 | -2.70036300 | 0.92938400  |
| F | 0.53242900  | -3.01479700 | 3.12666600  |
| F | 0.60688400  | -1.06613100 | 5.03268900  |
| F | -0.85461000 | 1.20278100  | 4.69798400  |
| F | -2.34719500 | 1.53056700  | 2.49391300  |
| H | 0.70915200  | 0.25062400  | -4.78093000 |

**c1b\*-cw**

|    |             |             |             |
|----|-------------|-------------|-------------|
| Ni | -2.89552200 | 1.06524100  | -0.13043000 |
| N  | -3.34507000 | -0.69849900 | -0.63834000 |
| N  | -1.88027200 | 1.47161800  | -1.64140500 |

|   |             |             |             |
|---|-------------|-------------|-------------|
| C | -3.38749100 | -2.77108700 | -1.94482800 |
| H | -3.33168100 | -3.04766000 | -3.00439600 |
| H | -4.40898900 | -2.95159100 | -1.58226700 |
| H | -2.73818900 | -3.47102100 | -1.39449600 |
| C | -2.96073600 | -1.35228100 | -1.71730100 |
| C | -2.13395900 | -0.72011600 | -2.67460200 |
| H | -1.85880100 | -1.31078600 | -3.54939200 |
| C | -1.64499700 | 0.58633700  | -2.63787200 |
| C | -4.26670100 | -1.19388600 | 0.31568000  |
| C | -5.60615800 | -0.73111100 | 0.25785100  |
| C | -6.49616800 | -1.16410600 | 1.24515600  |
| H | -7.53456300 | -0.82660500 | 1.22023900  |
| C | -6.08001800 | -2.01376000 | 2.26537800  |
| H | -6.79163900 | -2.34261700 | 3.02606100  |
| C | -4.75372800 | -2.43137400 | 2.32781600  |
| H | -4.43507600 | -3.07978800 | 3.14670400  |
| C | -3.82127800 | -2.02597200 | 1.36935000  |
| C | -6.05770500 | 0.20378600  | -0.84965600 |
| H | -5.20392400 | 0.87851100  | -1.06584800 |
| C | -7.23888000 | 1.07691400  | -0.45361000 |
| H | -7.41094400 | 1.85773300  | -1.20790800 |
| H | -7.08192900 | 1.57527900  | 0.51432000  |
| H | -8.17322200 | 0.50014200  | -0.37810700 |
| C | -6.35909400 | -0.55289700 | -2.14068400 |
| H | -6.68970400 | 0.13552600  | -2.93208500 |
| H | -7.16174800 | -1.29064800 | -1.98612000 |
| H | -5.48187100 | -1.09059700 | -2.52359700 |
| C | -2.35353400 | -2.37244800 | 1.51114000  |
| H | -1.92817400 | -2.47816400 | 0.49799400  |
| C | -2.10673600 | -3.67802500 | 2.25099600  |
| H | -1.04534900 | -3.95070200 | 2.20661500  |
| H | -2.68218500 | -4.50806500 | 1.81587000  |
| H | -2.37533600 | -3.60664700 | 3.31553400  |
| C | -1.61867200 | -1.20987900 | 2.17922100  |
| H | -0.55799200 | -1.44912400 | 2.33678900  |
| H | -2.06035900 | -0.96787400 | 3.15920900  |
| H | -1.66222100 | -0.29347000 | 1.55893600  |
| C | -1.29609900 | 2.74524200  | -1.68510000 |
| C | -1.94257600 | 3.85363700  | -2.24274100 |
| C | -1.36003900 | 5.11697600  | -2.19671200 |
| H | -1.89151200 | 5.96621600  | -2.63236200 |
| C | 0.58103600  | 4.23271700  | -1.08183600 |
| H | 1.57074100  | 4.34784300  | -0.63532700 |
| C | -0.10810200 | 5.31644700  | -1.60476300 |
| H | -2.91639100 | 3.70296500  | -2.71237200 |
| C | -0.00632000 | 2.95531800  | -1.13301500 |
| C | 0.71527900  | 1.83466600  | -0.67526400 |
| N | 1.34966900  | 0.93257700  | -0.32768100 |
| C | -0.79982600 | 1.04717200  | -3.79150100 |
| H | -1.24642600 | 1.92000200  | -4.29048200 |
| H | 0.20448100  | 1.35772300  | -3.46769400 |
| H | -0.67362400 | 0.25420000  | -4.53524400 |
| H | 0.33191000  | 6.31370500  | -1.56557500 |
| B | 2.21305200  | -0.31575100 | 0.07134500  |
| C | -2.17473200 | 2.18887900  | 3.26164700  |

|   |             |             |             |
|---|-------------|-------------|-------------|
| H | -1.31367600 | 1.61597000  | 2.89795000  |
| H | -2.47643400 | 1.75167700  | 4.22367000  |
| C | -3.30940200 | 2.20121400  | 2.26421300  |
| H | -3.70951200 | 1.15478300  | 2.15228800  |
| C | -2.96984800 | 2.75198900  | 0.86644400  |
| H | -2.04462600 | 3.35585200  | 0.88359500  |
| C | 2.16132600  | -0.49405900 | 1.68515900  |
| C | 1.54168000  | 0.35612400  | 2.59835300  |
| C | 2.84324000  | -1.57544000 | 2.24482000  |
| C | 1.53618300  | 0.12392800  | 3.97416400  |
| C | 2.86529000  | -1.84870700 | 3.60867300  |
| C | 2.20099500  | -0.98753500 | 4.48254700  |
| C | 3.74296500  | 0.04775200  | -0.35989000 |
| C | 4.28590400  | 1.28104700  | 0.00392500  |
| C | 4.61144800  | -0.81752700 | -1.02531200 |
| C | 5.59505200  | 1.66084500  | -0.28019400 |
| C | 5.93163200  | -0.48041800 | -1.32653700 |
| C | 6.42553400  | 0.76686800  | -0.95250300 |
| C | 1.49791500  | -1.48906200 | -0.81414500 |
| C | 1.44953600  | -1.33114000 | -2.20245900 |
| C | 0.81231100  | -2.60117000 | -0.32963600 |
| C | 0.77860300  | -2.19384600 | -3.05969200 |
| C | 0.11400700  | -3.48800000 | -1.15260200 |
| C | 0.08420900  | -3.27501900 | -2.52463700 |
| F | 4.20695600  | -2.02892800 | -1.40998400 |
| F | 6.71934600  | -1.33597600 | -1.96663000 |
| F | 7.67650000  | 1.10207700  | -1.23409600 |
| F | 6.05584900  | 2.85315300  | 0.08274600  |
| F | 3.52952400  | 2.17132500  | 0.66910300  |
| F | 0.89483400  | 0.95169200  | 4.79376600  |
| F | 0.88677300  | 1.45298700  | 2.19159000  |
| F | 2.20650900  | -1.22622200 | 5.78636200  |
| F | 3.50820700  | -2.90782900 | 4.08512300  |
| F | 3.47903200  | -2.42789300 | 1.43458200  |
| F | 0.78109000  | -2.88783600 | 0.97539000  |
| F | -0.55715700 | -4.50956900 | -0.62419200 |
| F | -0.62417900 | -4.06957600 | -3.31629000 |
| F | 0.72537900  | -1.95995400 | -4.36851400 |
| F | 2.06657800  | -0.28200900 | -2.76726800 |
| C | -4.12689800 | 3.51783800  | 0.26873200  |
| H | -5.05323600 | 2.91787000  | 0.26663200  |
| H | -4.36424300 | 4.43438400  | 0.84243400  |
| H | -3.94966400 | 3.83969800  | -0.76683400 |
| H | -4.18827100 | 2.73862500  | 2.66701900  |
| H | -1.81681200 | 3.20957600  | 3.46075800  |

**c1c-R**

|    |             |             |             |
|----|-------------|-------------|-------------|
| Ni | -2.91908500 | 1.39234100  | -0.41457000 |
| N  | -3.47518800 | -0.54406800 | -0.30277900 |
| N  | -1.73750600 | 1.02985100  | -1.98974500 |
| C  | -3.36130100 | -2.96808300 | -0.73207600 |
| H  | -3.01826900 | -3.64649300 | -1.52074400 |
| H  | -4.44673700 | -3.08382600 | -0.61552000 |
| H  | -2.92523100 | -3.31668200 | 0.21748100  |
| C  | -2.96279000 | -1.54464500 | -1.01732700 |

|   |             |             |             |
|---|-------------|-------------|-------------|
| C | -2.04159500 | -1.35904300 | -2.06748200 |
| H | -1.75923100 | -2.25914400 | -2.61332000 |
| C | -1.48243000 | -0.17081400 | -2.53594300 |
| C | -4.48834900 | -0.90086800 | 0.63463100  |
| C | -5.84079100 | -0.80415300 | 0.23787200  |
| C | -6.83008500 | -1.16424800 | 1.15862100  |
| H | -7.88251200 | -1.09623600 | 0.87180100  |
| C | -6.49608400 | -1.60553300 | 2.43471300  |
| H | -7.28101300 | -1.88733500 | 3.14006300  |
| C | -5.15874400 | -1.68397000 | 2.81236100  |
| H | -4.90799800 | -2.03141300 | 3.81696600  |
| C | -4.13105600 | -1.33676400 | 1.92914800  |
| C | -6.20873900 | -0.30624300 | -1.15007700 |
| H | -5.38676400 | 0.35742500  | -1.47580900 |
| C | -7.49387000 | 0.51128000  | -1.16785300 |
| H | -7.63630700 | 0.98622200  | -2.14932900 |
| H | -7.49141100 | 1.30731500  | -0.40868900 |
| H | -8.38410500 | -0.11019000 | -0.98893600 |
| C | -6.28562800 | -1.43884800 | -2.17153200 |
| H | -6.60244100 | -1.05952800 | -3.15426200 |
| H | -7.01480000 | -2.20370800 | -1.86188000 |
| H | -5.31913500 | -1.93907300 | -2.31676200 |
| C | -2.67467700 | -1.39850300 | 2.35531700  |
| H | -2.08548300 | -1.72849800 | 1.48170500  |
| C | -2.40656200 | -2.38558600 | 3.47981900  |
| H | -1.32685500 | -2.49125800 | 3.64770800  |
| H | -2.80518300 | -3.38510700 | 3.25378300  |
| H | -2.84948600 | -2.05526000 | 4.43141000  |
| C | -2.16669400 | -0.00641100 | 2.71464600  |
| H | -1.08937200 | -0.01169000 | 2.94247000  |
| H | -2.69850600 | 0.39791600  | 3.59044700  |
| H | -2.33025500 | 0.69383200  | 1.88222800  |
| C | -1.10393000 | 2.16280000  | -2.50193000 |
| C | -1.82128800 | 3.14385600  | -3.20016100 |
| C | -1.20844200 | 4.32044200  | -3.61602500 |
| H | -1.79473600 | 5.06361600  | -4.16133000 |
| C | 0.88660300  | 3.62393700  | -2.66055300 |
| H | 1.93937100  | 3.78899300  | -2.42126400 |
| C | 0.14351200  | 4.56974900  | -3.34650200 |
| H | -2.87854900 | 2.96058600  | -3.40079400 |
| C | 0.26840500  | 2.42807500  | -2.24413700 |
| C | 1.01364400  | 1.49036600  | -1.50380900 |
| N | 1.64042300  | 0.73904200  | -0.88659100 |
| C | -0.59993700 | -0.26452300 | -3.75018000 |
| H | -0.97535400 | 0.38080700  | -4.55858100 |
| H | 0.43325000  | 0.05383500  | -3.55499700 |
| H | -0.54666100 | -1.29335600 | -4.12337700 |
| H | 0.60933000  | 5.50137500  | -3.67006300 |
| B | 2.42798200  | -0.32008800 | -0.04357900 |
| H | 0.40268900  | 4.56374400  | 0.45292100  |
| C | 0.04173400  | 5.03112200  | 1.38068600  |
| H | -0.58223100 | 5.89166000  | 1.09224800  |
| H | 0.92676600  | 5.42193100  | 1.90154600  |
| C | -0.71940300 | 4.05484100  | 2.25302100  |
| H | -0.05011100 | 3.23715200  | 2.56167300  |

|   |             |             |             |
|---|-------------|-------------|-------------|
| H | -1.02010200 | 4.55117200  | 3.19051700  |
| C | -1.96917100 | 3.44522700  | 1.61414700  |
| H | -2.70647800 | 4.24462000  | 1.41925200  |
| H | -2.42921400 | 2.78340300  | 2.36302200  |
| C | -1.66406900 | 2.70472200  | 0.33673200  |
| H | -1.38557900 | 3.41469100  | -0.45414200 |
| H | -0.83796100 | 1.97670200  | 0.47453200  |
| C | -4.49581300 | 2.19629600  | 0.50373400  |
| H | -4.27145200 | 2.64093500  | 1.47460600  |
| H | -5.31637300 | 1.47756600  | 0.52653500  |
| C | -4.17377500 | 2.86909700  | -0.68895000 |
| H | -4.71129400 | 2.62473600  | -1.61552700 |
| H | -3.71031600 | 3.86229000  | -0.68725800 |
| C | 2.56989000  | 0.21403500  | 1.48611400  |
| C | 2.31170500  | 1.50479100  | 1.94457600  |
| C | 3.12350900  | -0.65294300 | 2.43038400  |
| C | 2.54759100  | 1.90665800  | 3.26055100  |
| C | 3.36410100  | -0.30081300 | 3.75446300  |
| C | 3.06786800  | 0.99575400  | 4.17406500  |
| C | 3.93332800  | -0.39774700 | -0.67123500 |
| C | 4.62936100  | 0.77938200  | -0.95224200 |
| C | 4.64758300  | -1.57844600 | -0.88021600 |
| C | 5.93908800  | 0.80820800  | -1.42472100 |
| C | 5.96242300  | -1.59614800 | -1.34704500 |
| C | 6.61167000  | -0.39538500 | -1.62202100 |
| C | 1.51726800  | -1.65314100 | -0.27979000 |
| C | 1.43799100  | -2.17899900 | -1.57174100 |
| C | 0.72694000  | -2.29979400 | 0.66895000  |
| C | 0.67888900  | -3.29103000 | -1.91198400 |
| C | -0.03551600 | -3.43295700 | 0.37547600  |
| C | -0.06640500 | -3.92636900 | -0.92339100 |
| F | 4.09061100  | -2.76719800 | -0.64166400 |
| F | 6.59864700  | -2.74592800 | -1.53386800 |
| F | 7.85967100  | -0.39711300 | -2.06759100 |
| F | 6.54890600  | 1.96075500  | -1.68012700 |
| F | 4.03394900  | 1.96853400  | -0.75733300 |
| F | 2.28112700  | 3.15259900  | 3.64397000  |
| F | 1.82886100  | 2.45053400  | 1.12512500  |
| F | 3.29304700  | 1.36006300  | 5.42816100  |
| F | 3.87390500  | -1.17441100 | 4.61366700  |
| F | 3.43664300  | -1.89890700 | 2.06061600  |
| F | 0.65947800  | -1.86406300 | 1.93061700  |
| F | -0.76210500 | -4.02382100 | 1.32057700  |
| F | -0.82310000 | -4.97244900 | -1.22798500 |
| F | 0.59902600  | -3.70785300 | -3.17309100 |
| F | 2.12387500  | -1.59399600 | -2.56508800 |

**c1c-TS**

|    |             |             |             |
|----|-------------|-------------|-------------|
| Ni | -2.99610300 | 1.32656800  | -0.52863400 |
| N  | -3.45364800 | -0.54422900 | -0.33160100 |
| N  | -1.73879900 | 0.98760700  | -2.05138500 |
| C  | -3.28191500 | -2.97520400 | -0.64801800 |
| H  | -2.97097400 | -3.67601500 | -1.43062300 |
| H  | -4.35477800 | -3.10894900 | -0.46288000 |
| H  | -2.78271700 | -3.28109600 | 0.28501800  |

|   |             |             |             |
|---|-------------|-------------|-------------|
| C | -2.92243800 | -1.55856000 | -1.00966300 |
| C | -2.00800500 | -1.40141700 | -2.07163500 |
| H | -1.71632200 | -2.31598100 | -2.58772100 |
| C | -1.46231400 | -0.22042900 | -2.57005100 |
| C | -4.44146700 | -0.87071200 | 0.64649600  |
| C | -5.80287300 | -0.85910800 | 0.26865500  |
| C | -6.76078300 | -1.16431500 | 1.24105100  |
| H | -7.82027100 | -1.15828800 | 0.97324800  |
| C | -6.38876100 | -1.47697800 | 2.54423800  |
| H | -7.15112600 | -1.71329200 | 3.28999000  |
| C | -5.04226400 | -1.49641500 | 2.89388100  |
| H | -4.76120600 | -1.75757800 | 3.91637400  |
| C | -4.04280700 | -1.20320900 | 1.95954700  |
| C | -6.22450400 | -0.52349100 | -1.15394500 |
| H | -5.44509500 | 0.14021200  | -1.57226100 |
| C | -7.55196500 | 0.22313900  | -1.21493500 |
| H | -7.73701100 | 0.60124400  | -2.23050000 |
| H | -7.58273500 | 1.08106300  | -0.52693700 |
| H | -8.40353300 | -0.42640400 | -0.96268300 |
| C | -6.27838100 | -1.75400100 | -2.05776000 |
| H | -6.67079700 | -1.48911000 | -3.05062900 |
| H | -6.93912300 | -2.52859900 | -1.63813500 |
| H | -5.29073400 | -2.20550200 | -2.21534900 |
| C | -2.57465000 | -1.24186200 | 2.35144200  |
| H | -2.00892000 | -1.60832800 | 1.47650400  |
| C | -2.28438900 | -2.19124800 | 3.50403300  |
| H | -1.20197200 | -2.30452200 | 3.64533200  |
| H | -2.70140300 | -3.19296800 | 3.32581700  |
| H | -2.69580600 | -1.82195300 | 4.45542600  |
| C | -2.03976400 | 0.15511700  | 2.65111900  |
| H | -0.96111600 | 0.12962800  | 2.87105500  |
| H | -2.55244900 | 0.60291300  | 3.51764600  |
| H | -2.19250700 | 0.82723200  | 1.79299400  |
| C | -1.10463000 | 2.12047900  | -2.55037000 |
| C | -1.79953300 | 3.07837400  | -3.30469300 |
| C | -1.18794000 | 4.25973400  | -3.70682700 |
| H | -1.75533700 | 4.98037800  | -4.30042100 |
| C | 0.86593500  | 3.61754300  | -2.63040300 |
| H | 1.90441500  | 3.80318300  | -2.34765200 |
| C | 0.14236900  | 4.54023600  | -3.36658200 |
| H | -2.83775000 | 2.86633500  | -3.56930400 |
| C | 0.24881000  | 2.41540300  | -2.22771800 |
| C | 0.98719000  | 1.48328600  | -1.47212800 |
| N | 1.61943100  | 0.73911300  | -0.85124000 |
| C | -0.56528500 | -0.32407500 | -3.77124700 |
| H | -0.94888000 | 0.28837700  | -4.60136000 |
| H | 0.45604100  | 0.03026400  | -3.57211200 |
| H | -0.47827900 | -1.36054900 | -4.11596100 |
| H | 0.60842900  | 5.47489700  | -3.68099200 |
| B | 2.43953100  | -0.31018600 | -0.02337900 |
| H | 0.34376100  | 4.51091400  | 0.48315100  |
| C | 0.07106900  | 4.87640700  | 1.48470500  |
| H | -0.41114300 | 5.85781600  | 1.35519600  |
| H | 1.01162000  | 5.03399000  | 2.02841300  |
| C | -0.83322900 | 3.90562400  | 2.21604100  |

|   |             |             |             |
|---|-------------|-------------|-------------|
| H | -0.30891200 | 2.95078900  | 2.37448300  |
| H | -1.04537300 | 4.28694400  | 3.22830400  |
| C | -2.16100300 | 3.63758000  | 1.51794100  |
| H | -2.73066200 | 4.58149300  | 1.45360100  |
| H | -2.76139200 | 2.97286900  | 2.15717100  |
| C | -2.00384600 | 3.03226900  | 0.13847500  |
| H | -1.63859200 | 3.75843100  | -0.60055400 |
| H | -1.26455900 | 2.20225700  | 0.18539500  |
| C | -4.56011500 | 2.06805500  | 0.33535400  |
| H | -4.56488900 | 2.17912400  | 1.42635600  |
| H | -5.44803100 | 1.56562700  | -0.04915400 |
| C | -3.93216900 | 3.08277400  | -0.46661900 |
| H | -4.17170200 | 3.08666700  | -1.54150300 |
| H | -3.84012500 | 4.11430100  | -0.11338600 |
| C | 2.57828100  | 0.20841700  | 1.51108500  |
| C | 2.23745600  | 1.46792100  | 1.99710300  |
| C | 3.17009500  | -0.64826900 | 2.44088800  |
| C | 2.42202400  | 1.84788200  | 3.32741000  |
| C | 3.37058400  | -0.31597400 | 3.77670000  |
| C | 2.98874300  | 0.94848400  | 4.22459500  |
| C | 3.93831500  | -0.34887300 | -0.67069800 |
| C | 4.60547400  | 0.84491400  | -0.95155000 |
| C | 4.67513900  | -1.51193100 | -0.90062300 |
| C | 5.90695800  | 0.90610400  | -1.44322300 |
| C | 5.98277700  | -1.49734500 | -1.38742400 |
| C | 6.60223700  | -0.28071500 | -1.66145100 |
| C | 1.55195800  | -1.65953200 | -0.25040700 |
| C | 1.47256500  | -2.19940300 | -1.53633500 |
| C | 0.77173300  | -2.30401200 | 0.70780100  |
| C | 0.72163800  | -3.32161800 | -1.86102400 |
| C | 0.01356100  | -3.44297900 | 0.42945800  |
| C | -0.01856400 | -3.95008400 | -0.86397400 |
| F | 4.14846000  | -2.71435600 | -0.66344100 |
| F | 6.64035000  | -2.63171400 | -1.59369200 |
| F | 7.84307100  | -0.25151000 | -2.12575900 |
| F | 6.48725700  | 2.07424800  | -1.69718100 |
| F | 3.98914500  | 2.02051500  | -0.73901300 |
| F | 2.06533000  | 3.06216500  | 3.73961700  |
| F | 1.70660600  | 2.39964800  | 1.19109000  |
| F | 3.17068700  | 1.29159300  | 5.49166100  |
| F | 3.91860300  | -1.17929000 | 4.62254300  |
| F | 3.54380400  | -1.87032400 | 2.04900700  |
| F | 0.70939300  | -1.85999400 | 1.96737700  |
| F | -0.70960600 | -4.02201200 | 1.38471200  |
| F | -0.77125900 | -5.00249900 | -1.15594200 |
| F | 0.64275100  | -3.75451300 | -3.11665400 |
| F | 2.14860100  | -1.61831400 | -2.53828400 |

**c1c-P**

|    |             |             |             |
|----|-------------|-------------|-------------|
| Ni | -3.47006200 | 0.58624700  | -1.19598000 |
| N  | -3.62793000 | -1.02476800 | -0.24012600 |
| N  | -2.29566600 | -0.08881400 | -2.59630000 |
| C  | -3.21500600 | -3.38424100 | 0.28850100  |
| H  | -2.81924300 | -4.27882200 | -0.20539100 |
| H  | -4.27621100 | -3.54982900 | 0.51882000  |



|   |             |             |             |
|---|-------------|-------------|-------------|
| H | -2.70910900 | -3.29414900 | 1.26195300  |
| C | -3.00743500 | -2.15814700 | -0.55875000 |
| C | -2.16054200 | -2.30249000 | -1.67934300 |
| H | -1.76038600 | -3.30361200 | -1.84319200 |
| C | -1.82211200 | -1.34828500 | -2.63683400 |
| C | -4.51736700 | -1.02714000 | 0.87667000  |
| C | -5.90633600 | -1.11041100 | 0.63116800  |
| C | -6.77258400 | -1.08588300 | 1.72842400  |
| H | -7.85088400 | -1.14962500 | 1.56571100  |
| C | -6.28506900 | -0.97689100 | 3.02686600  |
| H | -6.97686500 | -0.96185100 | 3.87207700  |
| C | -4.91530500 | -0.88114400 | 3.24637800  |
| H | -4.54475400 | -0.78875700 | 4.26945200  |
| C | -4.00357800 | -0.90234600 | 2.18455400  |
| C | -6.43895300 | -1.20451200 | -0.78723800 |
| H | -5.76494800 | -0.58871500 | -1.41532000 |
| C | -7.84488200 | -0.64204900 | -0.93880900 |
| H | -8.12148900 | -0.57629100 | -2.00067900 |
| H | -7.93981700 | 0.36427800  | -0.50499100 |
| H | -8.60176200 | -1.27932000 | -0.45672000 |
| C | -6.37510700 | -2.62659600 | -1.33979500 |
| H | -6.80432500 | -2.67232900 | -2.35164800 |
| H | -6.94566900 | -3.32495900 | -0.70776300 |
| H | -5.34647100 | -3.00357200 | -1.41127400 |
| C | -2.51504700 | -0.74626300 | 2.44311300  |
| H | -1.97468700 | -1.33985000 | 1.68601300  |
| C | -2.08506000 | -1.26330100 | 3.80824000  |
| H | -0.99028800 | -1.27477300 | 3.88532000  |
| H | -2.44297600 | -2.28696600 | 3.99243300  |
| H | -2.45690800 | -0.62812700 | 4.62611700  |
| C | -2.06573600 | 0.69941300  | 2.24582600  |
| H | -1.00218400 | 0.80354700  | 2.50245700  |
| H | -2.63501700 | 1.39163900  | 2.88688200  |
| H | -2.19168900 | 1.02341900  | 1.20030500  |
| C | -1.89001000 | 0.84381300  | -3.54968800 |
| C | -2.80294800 | 1.39655500  | -4.46307300 |
| C | -2.40690300 | 2.36302500  | -5.37949900 |
| H | -3.13999600 | 2.76134100  | -6.08480600 |
| C | -0.16086500 | 2.32612500  | -4.52025200 |
| H | 0.86722200  | 2.69413800  | -4.49688000 |
| C | -1.08552800 | 2.82820200  | -5.41986000 |
| H | -3.83349000 | 1.03414000  | -4.43780100 |
| C | -0.55963600 | 1.34594400  | -3.58953800 |
| C | 0.33049500  | 0.94253300  | -2.57745600 |
| N | 1.03139600  | 0.66510700  | -1.70035400 |
| C | -0.95243500 | -1.78590500 | -3.78150000 |
| H | -1.35781300 | -1.44657200 | -4.74611700 |
| H | 0.07194200  | -1.38966000 | -3.71606900 |
| H | -0.86141100 | -2.87729000 | -3.81071300 |
| H | -0.78823500 | 3.58895300  | -6.14277600 |
| B | 1.96153300  | 0.24839800  | -0.50634900 |
| H | 0.66145100  | 4.48287200  | -2.19265900 |
| C | 0.07095800  | 5.41233500  | -2.13459700 |
| H | -0.24463500 | 5.66258100  | -3.15978100 |
| H | 0.75366800  | 6.20531200  | -1.80072300 |

|   |             |             |             |
|---|-------------|-------------|-------------|
| C | -1.11352500 | 5.24496500  | -1.20557900 |
| H | -0.75568900 | 4.96234300  | -0.20286000 |
| H | -1.63247900 | 6.20884600  | -1.06645900 |
| C | -2.10094000 | 4.19743700  | -1.69234700 |
| H | -1.53386300 | 3.31651900  | -2.04357100 |
| H | -2.63517900 | 4.56876800  | -2.58756400 |
| C | -3.09442700 | 3.72814300  | -0.64605000 |
| H | -2.54566600 | 3.34227100  | 0.22815600  |
| H | -3.69658800 | 4.57233600  | -0.26996000 |
| C | -4.61597900 | 1.71050500  | -0.16784600 |
| H | -4.33146500 | 1.85241900  | 0.88308000  |
| H | -5.67478300 | 1.44364500  | -0.27768200 |
| C | -4.04657700 | 2.65145000  | -1.14770000 |
| H | -3.40470100 | 2.05215100  | -1.94023700 |
| H | -4.78780800 | 3.05200900  | -1.86327300 |
| C | 1.71753300  | 1.27201800  | 0.73194700  |
| C | 0.69165000  | 2.20421900  | 0.85453400  |
| C | 2.59158400  | 1.20320000  | 1.81822500  |
| C | 0.52622000  | 3.01360800  | 1.97784600  |
| C | 2.47239200  | 1.99725500  | 2.95470600  |
| C | 1.42847900  | 2.91892800  | 3.03175100  |
| C | 3.47561200  | 0.42873300  | -1.08050400 |
| C | 3.82851400  | 1.60072100  | -1.75110000 |
| C | 4.50157100  | -0.50103900 | -0.91534000 |
| C | 5.10546000  | 1.84712200  | -2.25002600 |
| C | 5.79521100  | -0.29419500 | -1.39385300 |
| C | 6.09795400  | 0.88723700  | -2.06698800 |
| C | 1.46958900  | -1.28328900 | -0.23152200 |
| C | 1.51914700  | -2.19792700 | -1.28659400 |
| C | 0.85834300  | -1.75505600 | 0.92927600  |
| C | 0.98508300  | -3.47878500 | -1.22890700 |
| C | 0.31301700  | -3.03713500 | 1.03412400  |
| C | 0.36288700  | -3.89742500 | -0.05566900 |
| F | 4.28093800  | -1.64748100 | -0.27098700 |
| F | 6.73965200  | -1.20882600 | -1.21166000 |
| F | 7.32185600  | 1.09735700  | -2.52979800 |
| F | 5.38261100  | 2.97764400  | -2.89124900 |
| F | 2.91064500  | 2.56547000  | -1.94474900 |
| F | -0.51303000 | 3.84237700  | 2.06501700  |
| F | -0.24444600 | 2.33381800  | -0.10025300 |
| F | 1.28342000  | 3.67720000  | 4.10870400  |
| F | 3.32659700  | 1.88072500  | 3.96347500  |
| F | 3.56536800  | 0.28742700  | 1.81335600  |
| F | 0.75369400  | -0.99211300 | 2.02231900  |
| F | -0.28343000 | -3.42750300 | 2.15719800  |
| F | -0.20572500 | -5.09437000 | 0.00488500  |
| F | 0.99770100  | -4.27812400 | -2.29172500 |
| F | 2.08635400  | -1.83100200 | -2.44650900 |

**c1c-TSβH**

|    |             |             |             |
|----|-------------|-------------|-------------|
| Ni | -3.31063100 | 0.91798900  | -1.03330100 |
| N  | -3.46814300 | -0.84553800 | -0.20042000 |
| N  | -1.94147200 | 0.37642100  | -2.28154700 |
| C  | -3.24804300 | -3.29271800 | -0.06604400 |
| H  | -3.01782400 | -4.10859200 | -0.76100700 |

|   |             |             |             |
|---|-------------|-------------|-------------|
| H | -4.30478500 | -3.36126400 | 0.22300100  |
| H | -2.67135600 | -3.48217600 | 0.85269700  |
| C | -2.91373100 | -1.95613200 | -0.67186100 |
| C | -2.01056000 | -1.96961700 | -1.76048800 |
| H | -1.66713000 | -2.95336800 | -2.08169700 |
| C | -1.52181900 | -0.88698100 | -2.48663700 |
| C | -4.35663400 | -0.94431800 | 0.90989200  |
| C | -5.74645200 | -0.86033700 | 0.66561100  |
| C | -6.61413000 | -0.90021900 | 1.76090300  |
| H | -7.69237100 | -0.84097500 | 1.59679000  |
| C | -6.12697700 | -1.00501100 | 3.05918600  |
| H | -6.81890600 | -1.03309400 | 3.90385800  |
| C | -4.75576000 | -1.06762600 | 3.28124700  |
| H | -4.38976100 | -1.14265300 | 4.30638000  |
| C | -3.84045700 | -1.03921600 | 2.22159300  |
| C | -6.27768000 | -0.70743300 | -0.74821800 |
| H | -5.55879600 | -0.05389600 | -1.28327500 |
| C | -7.63825300 | -0.02937200 | -0.81097700 |
| H | -7.90144900 | 0.20947100  | -1.85102300 |
| H | -7.66500900 | 0.90773000  | -0.23582500 |
| H | -8.44181300 | -0.67424500 | -0.42390300 |
| C | -6.31242100 | -2.03362300 | -1.50393200 |
| H | -6.73407300 | -1.89914300 | -2.51089000 |
| H | -6.93826600 | -2.77290800 | -0.98010900 |
| H | -5.31388700 | -2.47169000 | -1.63060300 |
| C | -2.34231200 | -1.08176300 | 2.48832500  |
| H | -1.89966500 | -1.79254900 | 1.76807700  |
| C | -2.00141900 | -1.59001000 | 3.88090200  |
| H | -0.92127600 | -1.74429700 | 3.98172600  |
| H | -2.49344200 | -2.54850000 | 4.09956400  |
| H | -2.30083800 | -0.87462500 | 4.66159500  |
| C | -1.66027400 | 0.25939900  | 2.22060200  |
| H | -0.58539400 | 0.19681400  | 2.44492500  |
| H | -2.08203300 | 1.06483300  | 2.84487900  |
| H | -1.75798700 | 0.56000000  | 1.16534800  |
| C | -1.28013400 | 1.45268900  | -2.87250200 |
| C | -1.90572900 | 2.30195600  | -3.80100700 |
| C | -1.25164100 | 3.40955500  | -4.32082400 |
| H | -1.76765500 | 4.03809600  | -5.05026100 |
| C | 0.71099900  | 2.92164400  | -3.02254900 |
| H | 1.72578500  | 3.14443000  | -2.68600300 |
| C | 0.05776800  | 3.73152600  | -3.93277300 |
| H | -2.92483400 | 2.06045200  | -4.10974600 |
| C | 0.04995500  | 1.78997000  | -2.49515500 |
| C | 0.73013100  | 1.02070500  | -1.53318600 |
| N | 1.35533000  | 0.44432600  | -0.74705100 |
| C | -0.55117500 | -1.16130800 | -3.59968200 |
| H | -0.91389900 | -0.72866000 | -4.54414800 |
| H | 0.44166200  | -0.72636300 | -3.42232800 |
| H | -0.40247700 | -2.23702400 | -3.74213800 |
| H | 0.55764000  | 4.61021000  | -4.34204200 |
| B | 2.28812500  | -0.36324800 | 0.22361200  |
| H | 0.37771300  | 4.46642600  | -0.12185500 |
| C | 0.13348300  | 5.29799400  | 0.55532700  |
| H | -0.15634300 | 6.15693400  | -0.07027500 |

|   |             |             |             |
|---|-------------|-------------|-------------|
| H | 1.06722700  | 5.56433600  | 1.07001200  |
| C | -0.95353800 | 4.92875400  | 1.54460400  |
| H | -0.60787600 | 4.08717300  | 2.16618400  |
| H | -1.11334200 | 5.76301900  | 2.24676300  |
| C | -2.28790000 | 4.55521600  | 0.91744600  |
| H | -2.72064700 | 5.41957700  | 0.38224100  |
| H | -3.00792400 | 4.31215600  | 1.71708000  |
| C | -2.19562100 | 3.36426300  | -0.03725900 |
| H | -1.63135100 | 3.65089800  | -0.94065000 |
| H | -1.61025600 | 2.56444900  | 0.44825000  |
| C | -4.28586900 | 1.93509100  | 0.35173500  |
| H | -3.90024200 | 1.61896400  | 1.32688300  |
| H | -5.37433700 | 1.87867900  | 0.24750800  |
| C | -3.55141900 | 2.85270700  | -0.43045700 |
| H | -3.64569400 | 1.90881300  | -2.03160000 |
| H | -4.11722900 | 3.53503000  | -1.07911400 |
| C | 2.37461400  | 0.39102700  | 1.66023000  |
| C | 1.80356700  | 1.61230600  | 2.00729300  |
| C | 3.18827600  | -0.18718300 | 2.63604600  |
| C | 2.01463800  | 2.22554200  | 3.24311200  |
| C | 3.41545300  | 0.37867900  | 3.88605600  |
| C | 2.82274400  | 1.60413300  | 4.18969500  |
| C | 3.77058700  | -0.28130000 | -0.45562800 |
| C | 4.26966800  | 0.95705300  | -0.86320100 |
| C | 4.64478000  | -1.35791100 | -0.60533300 |
| C | 5.53832400  | 1.13787900  | -1.40771800 |
| C | 5.92627700  | -1.22222700 | -1.14046300 |
| C | 6.37510700  | 0.03260000  | -1.54529700 |
| C | 1.57851600  | -1.83002400 | 0.21622200  |
| C | 1.49562300  | -2.53442900 | -0.98687100 |
| C | 0.89409300  | -2.40577400 | 1.28377000  |
| C | 0.78559500  | -3.71840400 | -1.14250500 |
| C | 0.15810200  | -3.58715000 | 1.17168100  |
| C | 0.09281900  | -4.24063900 | -0.05324300 |
| F | 4.28341200  | -2.58752400 | -0.23774900 |
| F | 6.72157000  | -2.27702100 | -1.26777900 |
| F | 7.58884800  | 0.17352900  | -2.05838300 |
| F | 5.95403100  | 2.34170200  | -1.78708200 |
| F | 3.50790500  | 2.05903900  | -0.73275000 |
| F | 1.44944000  | 3.39753800  | 3.52306400  |
| F | 1.00050300  | 2.26874100  | 1.15588600  |
| F | 3.02751000  | 2.17200600  | 5.36958000  |
| F | 4.18591300  | -0.22479000 | 4.78243000  |
| F | 3.76841900  | -1.36409200 | 2.37819800  |
| F | 0.89779800  | -1.83679200 | 2.49295200  |
| F | -0.51855900 | -4.06247500 | 2.21432700  |
| F | -0.64142700 | -5.33636600 | -0.19336600 |
| F | 0.69345900  | -4.31340300 | -2.32934100 |
| F | 2.10918400  | -2.05105900 | -2.07639800 |

**c1c-PβH**

|    |             |             |             |
|----|-------------|-------------|-------------|
| Ni | -3.29574900 | 0.96545000  | -1.24205900 |
| N  | -3.44900700 | -0.75985400 | -0.28159000 |
| N  | -1.87875200 | 0.35174600  | -2.39494300 |
| C  | -3.24941300 | -3.20114600 | -0.02529600 |

|   |             |             |             |
|---|-------------|-------------|-------------|
| H | -3.09123300 | -4.04637000 | -0.70551200 |
| H | -4.28753600 | -3.22026500 | 0.32979100  |
| H | -2.62218200 | -3.38552400 | 0.86101400  |
| C | -2.90267100 | -1.89770400 | -0.69234600 |
| C | -1.99111200 | -1.96727400 | -1.77355700 |
| H | -1.65898900 | -2.96868900 | -2.04907500 |
| C | -1.47885200 | -0.92508800 | -2.54361700 |
| C | -4.34045200 | -0.77846200 | 0.82885300  |
| C | -5.72849700 | -0.67344100 | 0.57891400  |
| C | -6.59505900 | -0.61986300 | 1.67437200  |
| H | -7.67155300 | -0.54319700 | 1.50614400  |
| C | -6.11027600 | -0.65484900 | 2.97746500  |
| H | -6.80218900 | -0.60895700 | 3.82133500  |
| C | -4.74145800 | -0.74364800 | 3.20402900  |
| H | -4.37533700 | -0.76594500 | 4.23172100  |
| C | -3.82757500 | -0.80769500 | 2.14499500  |
| C | -6.26049400 | -0.61490100 | -0.84118800 |
| H | -5.52754900 | -0.02699500 | -1.42853600 |
| C | -7.60209500 | 0.09303000  | -0.95636200 |
| H | -7.86024400 | 0.25847700  | -2.01184700 |
| H | -7.60249300 | 1.07174200  | -0.45479800 |
| H | -8.42242500 | -0.49805300 | -0.52156300 |
| C | -6.33331400 | -1.99636600 | -1.48694500 |
| H | -6.74717300 | -1.93212600 | -2.50400300 |
| H | -6.98220700 | -2.67167200 | -0.90770300 |
| H | -5.34789100 | -2.47294300 | -1.57092600 |
| C | -2.33137400 | -0.86706200 | 2.41471600  |
| H | -1.89865700 | -1.61418900 | 1.72601600  |
| C | -1.99867100 | -1.32137600 | 3.82762100  |
| H | -0.92217400 | -1.49637300 | 3.93400600  |
| H | -2.51164600 | -2.25871100 | 4.08648900  |
| H | -2.28027700 | -0.56711200 | 4.57763500  |
| C | -1.63780000 | 0.45389600  | 2.08595400  |
| H | -0.56470000 | 0.40126900  | 2.32232600  |
| H | -2.06430100 | 1.29469200  | 2.65774800  |
| H | -1.72497700 | 0.69455800  | 1.01475800  |
| C | -1.21422300 | 1.40866800  | -3.01065000 |
| C | -1.83408000 | 2.24431300  | -3.95555700 |
| C | -1.17439200 | 3.34020200  | -4.49172200 |
| H | -1.68657900 | 3.95764900  | -5.23320600 |
| C | 0.78217700  | 2.87028700  | -3.17847200 |
| H | 1.79694700  | 3.09481200  | -2.84300000 |
| C | 0.13483400  | 3.66570100  | -4.10500100 |
| H | -2.85410200 | 2.00369900  | -4.26077600 |
| C | 0.11644500  | 1.74987800  | -2.63288900 |
| C | 0.79264800  | 0.99781300  | -1.65577000 |
| N | 1.41574100  | 0.43402700  | -0.85843500 |
| C | -0.51409700 | -1.26295900 | -3.64365200 |
| H | -0.30411500 | -2.33714800 | -3.67694100 |
| H | -0.92634800 | -0.95649600 | -4.61691900 |
| H | 0.45234800  | -0.75143200 | -3.54436900 |
| H | 0.63845000  | 4.53576400  | -4.52781500 |
| B | 2.34126700  | -0.36401300 | 0.12625400  |
| H | 0.50680600  | 4.56176100  | -0.25730500 |
| C | 0.23575900  | 5.33979200  | 0.47148000  |

|               |             |             |             |
|---------------|-------------|-------------|-------------|
| H             | -0.06591600 | 6.23278600  | -0.09806800 |
| H             | 1.15666800  | 5.59022100  | 1.01601500  |
| C             | -0.85502100 | 4.88079800  | 1.41783700  |
| H             | -0.49726300 | 4.01023800  | 1.99021500  |
| H             | -1.04570200 | 5.66438600  | 2.16918600  |
| C             | -2.17136800 | 4.51756600  | 0.74928600  |
| H             | -2.61455500 | 5.40255300  | 0.25838800  |
| H             | -2.89830000 | 4.21383000  | 1.52125900  |
| C             | -2.04839000 | 3.38564500  | -0.27423100 |
| H             | -1.44538500 | 3.72223700  | -1.13371600 |
| H             | -1.48250100 | 2.55737000  | 0.18786600  |
| C             | -4.26698200 | 2.13154300  | 0.01822600  |
| H             | -3.99437900 | 1.84089200  | 1.04039000  |
| H             | -5.34304000 | 2.14346400  | -0.18361700 |
| C             | -3.39071500 | 2.91843900  | -0.75675900 |
| H             | -3.89075300 | 1.60372600  | -2.39079600 |
| H             | -3.82500200 | 3.52727400  | -1.55868500 |
| C             | 2.46985000  | 0.43425000  | 1.53559000  |
| C             | 1.94138400  | 1.68404700  | 1.84591400  |
| C             | 3.27273500  | -0.13797400 | 2.52363400  |
| C             | 2.18322400  | 2.33084200  | 3.05891400  |
| C             | 3.52951500  | 0.46129000  | 3.75214100  |
| C             | 2.97957700  | 1.71487100  | 4.01906300  |
| C             | 3.81749700  | -0.34770700 | -0.57209500 |
| C             | 4.34467700  | 0.86127100  | -1.02984700 |
| C             | 4.66334600  | -1.45119500 | -0.68705100 |
| C             | 5.61276300  | 0.98883100  | -1.59050200 |
| C             | 5.94339200  | -1.36849900 | -1.23619200 |
| C             | 6.42018500  | -0.14176200 | -1.69186000 |
| C             | 1.59338600  | -1.81045700 | 0.18280200  |
| C             | 1.49297300  | -2.56919400 | -0.98532400 |
| C             | 0.89398100  | -2.31592100 | 1.27608800  |
| C             | 0.76246500  | -3.74722100 | -1.08086400 |
| C             | 0.13650800  | -3.48751300 | 1.22286700  |
| C             | 0.05981900  | -4.20083600 | 0.03245700  |
| F             | 4.27475500  | -2.65656800 | -0.26939500 |
| F             | 6.71139700  | -2.44684700 | -1.32885300 |
| F             | 7.63312500  | -0.05109300 | -2.21789300 |
| F             | 6.05598500  | 2.16629900  | -2.01829600 |
| F             | 3.61402100  | 1.98730900  | -0.93352000 |
| F             | 1.65933100  | 3.52901500  | 3.30556100  |
| F             | 1.15283200  | 2.33559800  | 0.97759000  |
| F             | 3.21331500  | 2.31514700  | 5.17732200  |
| F             | 4.28752500  | -0.13734600 | 4.66232900  |
| F             | 3.81045400  | -1.34212500 | 2.30158400  |
| F             | 0.90226000  | -1.68275100 | 2.45297300  |
| F             | -0.55365800 | -3.89463200 | 2.28570900  |
| F             | -0.69633500 | -5.28702000 | -0.05382100 |
| F             | 0.65667100  | -4.39848300 | -2.23695900 |
| F             | 2.10704300  | -2.14804800 | -2.09958300 |
| <b>c1c*-R</b> |             |             |             |
| Ni            | -2.71081700 | 1.42156400  | 0.16758900  |
| N             | -3.40560600 | -0.42262800 | -0.46604100 |
| N             | -1.56686700 | 1.58861000  | -1.48712100 |

|   |             |             |             |
|---|-------------|-------------|-------------|
| C | -3.41841400 | -2.50817700 | -1.77207500 |
| H | -3.06766900 | -2.88138500 | -2.74014700 |
| H | -4.51105800 | -2.60145200 | -1.73366300 |
| H | -3.03898100 | -3.18873200 | -0.99450000 |
| C | -2.96429800 | -1.09501700 | -1.52376000 |
| C | -2.07258700 | -0.55977000 | -2.47501200 |
| H | -1.85095400 | -1.19870500 | -3.33024400 |
| C | -1.46603400 | 0.69325100  | -2.48622100 |
| C | -4.35273100 | -1.09874500 | 0.36104500  |
| C | -5.73982700 | -0.95759700 | 0.12782700  |
| C | -6.63271500 | -1.57499700 | 1.01208000  |
| H | -7.70825900 | -1.46531500 | 0.84447600  |
| C | -6.18101400 | -2.32650200 | 2.08860500  |
| H | -6.89306500 | -2.79434900 | 2.77199500  |
| C | -4.81284600 | -2.50339500 | 2.27480600  |
| H | -4.46497000 | -3.12762000 | 3.10015600  |
| C | -3.87944400 | -1.91316900 | 1.41786800  |
| C | -6.30398100 | -0.19301800 | -1.05722500 |
| H | -5.46096300 | 0.29963600  | -1.56987400 |
| C | -7.30484700 | 0.87881800  | -0.63160300 |
| H | -7.60151100 | 1.50167400  | -1.48857000 |
| H | -6.90605600 | 1.54473200  | 0.14552300  |
| H | -8.22669800 | 0.42988600  | -0.23176300 |
| C | -6.96318400 | -1.13123200 | -2.06695200 |
| H | -7.35921000 | -0.56891700 | -2.92525300 |
| H | -7.80748500 | -1.67255500 | -1.61318700 |
| H | -6.26846100 | -1.88401000 | -2.46249200 |
| C | -2.39226500 | -2.15739400 | 1.60469600  |
| H | -1.95096800 | -2.28340800 | 0.60077500  |
| C | -2.07851400 | -3.42192800 | 2.38911700  |
| H | -1.00363000 | -3.63774200 | 2.35001800  |
| H | -2.60659300 | -4.29676900 | 1.98279500  |
| H | -2.35261200 | -3.32939500 | 3.45085200  |
| C | -1.70673300 | -0.94698700 | 2.21905700  |
| H | -0.64494200 | -1.14191500 | 2.43018800  |
| H | -2.19166200 | -0.63202000 | 3.15531800  |
| H | -1.74279800 | -0.08632900 | 1.52711400  |
| C | -0.99730100 | 2.84593900  | -1.70325400 |
| C | -1.71902700 | 3.89799800  | -2.28322000 |
| C | -1.13997700 | 5.14990600  | -2.46087300 |
| H | -1.72451500 | 5.95038900  | -2.92023800 |
| C | 0.92525200  | 4.38313300  | -1.48639200 |
| H | 1.95737700  | 4.54579200  | -1.17048000 |
| C | 0.17479400  | 5.40266600  | -2.05010000 |
| H | -2.75077400 | 3.70634400  | -2.58815200 |
| C | 0.34749600  | 3.10868300  | -1.33100000 |
| C | 1.10114200  | 2.01900900  | -0.84604300 |
| N | 1.69777400  | 1.09845800  | -0.47816500 |
| C | -0.65811900 | 1.04617600  | -3.70432900 |
| H | -1.08149000 | 1.92111300  | -4.21997800 |
| H | 0.37907000  | 1.31198900  | -3.45428700 |
| H | -0.62353200 | 0.21671200  | -4.41799300 |
| H | 0.61221600  | 6.39349000  | -2.17957400 |
| B | 2.45381700  | -0.21741500 | -0.07139000 |
| C | -0.89883300 | 3.29774700  | 3.67424200  |

|   |             |             |             |
|---|-------------|-------------|-------------|
| H | 0.08602200  | 3.62270200  | 3.30823900  |
| H | -0.74213800 | 2.85881600  | 4.66849100  |
| C | -1.54014500 | 2.27731500  | 2.74080000  |
| H | -0.93405800 | 1.36409900  | 2.77893200  |
| C | -1.66106900 | 2.74201400  | 1.28789900  |
| H | -0.68816000 | 2.56867500  | 0.79918100  |
| C | -4.34460000 | 1.91982000  | 1.23922300  |
| H | -4.12955100 | 2.52085800  | 2.12504700  |
| H | -4.95578900 | 1.03271600  | 1.42738900  |
| C | -4.30695800 | 2.52676200  | -0.02454000 |
| H | -4.83807800 | 2.09190300  | -0.87738400 |
| H | -4.05347200 | 3.58445600  | -0.13799300 |
| C | 2.45350400  | -0.36039400 | 1.54666000  |
| C | 1.98310100  | 0.56858800  | 2.47140800  |
| C | 3.03116000  | -1.50698400 | 2.09453100  |
| C | 2.02348800  | 0.35690000  | 3.85049800  |
| C | 3.09015300  | -1.76362500 | 3.46007600  |
| C | 2.57665400  | -0.81858700 | 4.34810200  |
| C | 3.99632100  | -0.02973200 | -0.56660300 |
| C | 4.67741700  | 1.14924200  | -0.25870900 |
| C | 4.74912000  | -1.00219600 | -1.22563500 |
| C | 6.01074500  | 1.37903600  | -0.58848100 |
| C | 6.08858600  | -0.81682000 | -1.56986600 |
| C | 6.72226500  | 0.38150400  | -1.25105400 |
| C | 1.59594500  | -1.34416500 | -0.88864700 |
| C | 1.55327200  | -1.26219600 | -2.28355100 |
| C | 0.82260000  | -2.36609500 | -0.34053300 |
| C | 0.82528800  | -2.12727000 | -3.09046900 |
| C | 0.07400300  | -3.25859100 | -1.11186600 |
| C | 0.06744300  | -3.13182600 | -2.49471700 |
| F | 4.20980800  | -2.17529800 | -1.56157100 |
| F | 6.76430200  | -1.77117600 | -2.19792700 |
| F | 7.99314000  | 0.57138800  | -1.57538600 |
| F | 6.60495800  | 2.52602800  | -0.27674100 |
| F | 4.03953600  | 2.13345400  | 0.39604600  |
| F | 1.53969300  | 1.26955200  | 4.68823300  |
| F | 1.45379700  | 1.73499000  | 2.07444000  |
| F | 2.62220100  | -1.03623500 | 5.65462600  |
| F | 3.62770000  | -2.88479000 | 3.92404100  |
| F | 3.52153100  | -2.43972000 | 1.27156200  |
| F | 0.75596000  | -2.55855200 | 0.98043800  |
| F | -0.65685600 | -4.20441800 | -0.52647700 |
| F | -0.67970700 | -3.93265900 | -3.24319100 |
| F | 0.78956500  | -1.97117800 | -4.41132500 |
| F | 2.24954300  | -0.29895300 | -2.90616400 |
| C | -2.04266800 | 4.19530400  | 1.16379600  |
| H | -2.98299500 | 4.42747100  | 1.69058100  |
| H | -1.27371000 | 4.84631800  | 1.61348300  |
| H | -2.15183600 | 4.53103900  | 0.12525900  |
| H | -2.51788900 | 1.99049400  | 3.16121500  |
| H | -1.52014300 | 4.19443600  | 3.80855800  |

**c1c\*-TS**

|    |             |             |             |
|----|-------------|-------------|-------------|
| Ni | -2.96676000 | 1.37189800  | -0.66811800 |
| N  | -3.46163800 | -0.49885200 | -0.39784800 |



|   |             |             |             |
|---|-------------|-------------|-------------|
| N | -1.68326600 | 0.92913100  | -2.14654700 |
| C | -3.35638900 | -2.95219600 | -0.65958300 |
| H | -3.36101200 | -3.61561600 | -1.53352300 |
| H | -4.32859700 | -3.01689600 | -0.15902400 |
| H | -2.61988500 | -3.37307100 | 0.04205100  |
| C | -2.97512700 | -1.54882500 | -1.05358800 |
| C | -2.07438500 | -1.44695500 | -2.13386700 |
| H | -1.82054900 | -2.38323700 | -2.63250400 |
| C | -1.48964800 | -0.29755000 | -2.66038600 |
| C | -4.41216000 | -0.73546000 | 0.64215600  |
| C | -5.79398900 | -0.66808000 | 0.34816500  |
| C | -6.70251600 | -0.79207900 | 1.40428400  |
| H | -7.77446400 | -0.73277400 | 1.19903000  |
| C | -6.26845900 | -1.00096500 | 2.70860400  |
| H | -6.99250600 | -1.08546100 | 3.52207800  |
| C | -4.90883500 | -1.14091700 | 2.96691200  |
| H | -4.58083600 | -1.35730400 | 3.98590200  |
| C | -3.95624600 | -1.03493600 | 1.94717300  |
| C | -6.30449000 | -0.52641100 | -1.07742300 |
| H | -5.50853600 | -0.03798500 | -1.66655400 |
| C | -7.56571800 | 0.32501000  | -1.18127700 |
| H | -7.79473300 | 0.55169600  | -2.23245700 |
| H | -7.47868500 | 1.27980900  | -0.64262200 |
| H | -8.44609300 | -0.19583500 | -0.77598900 |
| C | -6.55525200 | -1.88760100 | -1.72547000 |
| H | -6.97372100 | -1.76656800 | -2.73559800 |
| H | -7.27503800 | -2.47907000 | -1.13851900 |
| H | -5.63949700 | -2.48315400 | -1.82418500 |
| C | -2.48382100 | -1.28235300 | 2.24562300  |
| H | -2.04143800 | -1.75140900 | 1.35056800  |
| C | -2.26647100 | -2.24737100 | 3.40268500  |
| H | -1.20648600 | -2.52276100 | 3.47295200  |
| H | -2.84465300 | -3.17472400 | 3.27893200  |
| H | -2.54763500 | -1.80468900 | 4.36995500  |
| C | -1.70867900 | 0.00948700  | 2.46933500  |
| H | -0.66509500 | -0.19610300 | 2.74861500  |
| H | -2.15697600 | 0.61397000  | 3.27347700  |
| H | -1.69505700 | 0.61788000  | 1.55208100  |
| C | -1.04488900 | 2.01398800  | -2.73552800 |
| C | -1.70865400 | 2.86909600  | -3.62945900 |
| C | -1.07012000 | 3.98118600  | -4.16650900 |
| H | -1.61152200 | 4.62365800  | -4.86495400 |
| C | 0.94688700  | 3.46680500  | -2.95696600 |
| H | 1.98139400  | 3.67572400  | -2.67603300 |
| C | 0.25431300  | 4.29130500  | -3.82798600 |
| H | -2.74068400 | 2.63008700  | -3.89670100 |
| C | 0.30472800  | 2.33254800  | -2.42171800 |
| C | 1.01211400  | 1.46913500  | -1.56375600 |
| N | 1.61341200  | 0.76511600  | -0.86991300 |
| C | -0.62522400 | -0.45274000 | -3.87972300 |
| H | -1.00682800 | 0.15861300  | -4.71156800 |
| H | 0.40935900  | -0.12307400 | -3.70668000 |
| H | -0.58089100 | -1.49515100 | -4.21222400 |
| H | 0.74033400  | 5.17214000  | -4.24945800 |
| B | 2.41811900  | -0.25594100 | 0.00602600  |

|   |             |             |             |
|---|-------------|-------------|-------------|
| C | -1.20059200 | 3.37916600  | 2.61773300  |
| H | -0.57552300 | 2.47857100  | 2.65673000  |
| H | -1.55928000 | 3.56981400  | 3.63861200  |
| C | -2.36444000 | 3.20749000  | 1.65985200  |
| H | -2.97480300 | 2.35414500  | 1.98948000  |
| C | -1.93652700 | 3.02052600  | 0.21371200  |
| C | -4.62813100 | 2.18116200  | -0.09352800 |
| H | -4.87333500 | 2.24227800  | 0.97312700  |
| H | -5.40748600 | 1.71825000  | -0.69826500 |
| C | -3.81255000 | 3.19624500  | -0.68616200 |
| H | -3.84315100 | 3.32195900  | -1.77898600 |
| H | -3.71834900 | 4.17243400  | -0.20196100 |
| C | 2.46824600  | 0.27669600  | 1.54008500  |
| C | 2.03003700  | 1.51083900  | 2.01688100  |
| C | 3.09622000  | -0.53920500 | 2.48285500  |
| C | 2.17137000  | 1.90334300  | 3.34944100  |
| C | 3.24365200  | -0.19763200 | 3.82293500  |
| C | 2.77316900  | 1.04010900  | 4.25959900  |
| C | 3.94181400  | -0.24862700 | -0.58071400 |
| C | 4.58602900  | 0.96608400  | -0.82133800 |
| C | 4.71219900  | -1.38966100 | -0.80852200 |
| C | 5.89966700  | 1.06753100  | -1.27194200 |
| C | 6.03285400  | -1.33476600 | -1.25577700 |
| C | 6.62993700  | -0.09848200 | -1.48936900 |
| C | 1.58232600  | -1.63190100 | -0.26399100 |
| C | 1.51116500  | -2.11172700 | -1.57491700 |
| C | 0.82891600  | -2.34766700 | 0.66423000  |
| C | 0.76591400  | -3.21931500 | -1.95763900 |
| C | 0.07100400  | -3.47069500 | 0.32536300  |
| C | 0.02469400  | -3.89867600 | -0.99519500 |
| F | 4.20683600  | -2.60757500 | -0.60791400 |
| F | 6.72354600  | -2.44913100 | -1.46319300 |
| F | 7.88280300  | -0.03108700 | -1.91601500 |
| F | 6.45780700  | 2.25363500  | -1.49003800 |
| F | 3.93122600  | 2.12161900  | -0.61259800 |
| F | 1.74119600  | 3.09457100  | 3.75598900  |
| F | 1.44323700  | 2.40348200  | 1.20256000  |
| F | 2.90921300  | 1.39583800  | 5.52890000  |
| F | 3.82952700  | -1.02301700 | 4.68084400  |
| F | 3.56648000  | -1.72950500 | 2.09681100  |
| F | 0.78982300  | -1.99503400 | 1.95254000  |
| F | -0.64794700 | -4.10237500 | 1.25091700  |
| F | -0.74532100 | -4.91998600 | -1.34582000 |
| F | 0.69345700  | -3.59432300 | -3.23201600 |
| F | 2.18692500  | -1.47650100 | -2.54451500 |
| H | -0.54136800 | 4.21357500  | 2.34049200  |
| C | -1.31218500 | 4.26698800  | -0.37052800 |
| H | -0.25933400 | 4.35877900  | -0.06097000 |
| H | -1.32873700 | 4.30268800  | -1.46614000 |
| H | -1.83156600 | 5.17011300  | -0.01320400 |
| H | -1.22505600 | 2.17018400  | 0.13963500  |
| H | -3.02653400 | 4.08920900  | 1.72539600  |

**c1c\*-P**

|    |             |            |             |
|----|-------------|------------|-------------|
| Ni | -2.78440400 | 0.93174000 | -0.82336800 |
|----|-------------|------------|-------------|

|   |             |             |             |
|---|-------------|-------------|-------------|
| N | -3.25625600 | -0.76928200 | -0.18219700 |
| N | -1.66719900 | 0.32813500  | -2.29828100 |
| C | -3.25106500 | -3.21907400 | -0.07359300 |
| H | -3.02802000 | -4.06381400 | -0.73498900 |
| H | -4.32406000 | -3.22809400 | 0.15969100  |
| H | -2.73523300 | -3.40528200 | 0.88143500  |
| C | -2.81616400 | -1.91722800 | -0.68979100 |
| C | -1.95902800 | -2.00317100 | -1.80910200 |
| H | -1.72856100 | -3.01286500 | -2.15044700 |
| C | -1.42037000 | -0.96724300 | -2.56993700 |
| C | -4.17813300 | -0.80995800 | 0.90701200  |
| C | -5.55216200 | -0.62939700 | 0.63275900  |
| C | -6.44569700 | -0.63598600 | 1.70817500  |
| H | -7.51358600 | -0.49948500 | 1.52294600  |
| C | -5.99736400 | -0.80798900 | 3.01372100  |
| H | -6.71017100 | -0.81291400 | 3.84141600  |
| C | -4.63878500 | -0.96791000 | 3.26402600  |
| H | -4.29873800 | -1.09533800 | 4.29372800  |
| C | -3.70086900 | -0.97099000 | 2.22488900  |
| C | -6.03678200 | -0.41120400 | -0.78911100 |
| H | -5.24608400 | 0.17085400  | -1.30205900 |
| C | -7.32293100 | 0.39894700  | -0.86582700 |
| H | -7.54265900 | 0.67598700  | -1.90667600 |
| H | -7.26669300 | 1.32646400  | -0.27719100 |
| H | -8.19352000 | -0.16762600 | -0.50192600 |
| C | -6.18910300 | -1.72002000 | -1.56074300 |
| H | -6.58092600 | -1.53397200 | -2.57165800 |
| H | -6.89142900 | -2.40082900 | -1.05484900 |
| H | -5.23555300 | -2.25087800 | -1.67982800 |
| C | -2.21657700 | -1.09952800 | 2.52392300  |
| H | -1.75641000 | -1.67794000 | 1.70421300  |
| C | -1.93040800 | -1.84767100 | 3.81762000  |
| H | -0.85606500 | -2.04806400 | 3.91491200  |
| H | -2.45530800 | -2.81330700 | 3.85947100  |
| H | -2.22853300 | -1.26698200 | 4.70342200  |
| C | -1.52072600 | 0.26057600  | 2.52373300  |
| H | -0.46677900 | 0.14742600  | 2.81513900  |
| H | -1.99300300 | 0.95756400  | 3.23527600  |
| H | -1.54213700 | 0.72876200  | 1.52588900  |
| C | -1.07481000 | 1.33797600  | -3.05358000 |
| C | -1.85284200 | 2.21062200  | -3.83383300 |
| C | -1.27183000 | 3.25299100  | -4.54476000 |
| H | -1.90596900 | 3.90336700  | -5.15164800 |
| C | 0.91012700  | 2.65522500  | -3.72864800 |
| H | 1.98583500  | 2.82343900  | -3.64704800 |
| C | 0.11076800  | 3.47852200  | -4.50286700 |
| H | -2.93107900 | 2.03693400  | -3.87083700 |
| C | 0.32418200  | 1.59620700  | -3.00620400 |
| C | 1.10401400  | 0.84021900  | -2.11196400 |
| N | 1.70829900  | 0.26175900  | -1.31361600 |
| C | -0.60161200 | -1.33833800 | -3.77403300 |
| H | -0.95089800 | -0.80609200 | -4.67152100 |
| H | 0.46454300  | -1.09406200 | -3.66210300 |
| H | -0.65367400 | -2.41528800 | -3.96887900 |
| H | 0.55455700  | 4.30175400  | -5.06397900 |

|   |             |             |             |
|---|-------------|-------------|-------------|
| B | 2.44928000  | -0.49177600 | -0.15220600 |
| C | -1.91314000 | 5.68238700  | 2.18842800  |
| H | -1.36492800 | 5.03266900  | 2.88509200  |
| H | -2.51941400 | 6.37106300  | 2.79214700  |
| C | -2.77641200 | 4.87656400  | 1.24054200  |
| H | -3.55776800 | 4.34832700  | 1.81269000  |
| C | -2.01935600 | 3.84995700  | 0.39698400  |
| H | -1.50436100 | 3.15355400  | 1.08300700  |
| C | -3.81441400 | 2.01990700  | 0.34652400  |
| H | -3.59081600 | 1.91230500  | 1.41689300  |
| H | -4.89082700 | 1.95699600  | 0.14199900  |
| C | -3.03100800 | 3.02144100  | -0.39726000 |
| H | -2.38299800 | 2.48790400  | -1.22396800 |
| H | -3.63943800 | 3.65856400  | -1.06717300 |
| C | 2.30416400  | 0.40886500  | 1.19705700  |
| C | 1.49046800  | 1.52499500  | 1.37658100  |
| C | 3.07028200  | 0.05150100  | 2.30887500  |
| C | 1.44212700  | 2.25269800  | 2.56495900  |
| C | 3.04695700  | 0.74106100  | 3.51749900  |
| C | 2.22497100  | 1.86068000  | 3.64449700  |
| C | 4.01083800  | -0.54731800 | -0.61566600 |
| C | 4.64082700  | 0.62107000  | -1.04679100 |
| C | 4.81526800  | -1.68613700 | -0.58448300 |
| C | 5.97617300  | 0.67705700  | -1.43875200 |
| C | 6.15722400  | -1.67592900 | -0.96546900 |
| C | 6.74046800  | -0.48661300 | -1.39619600 |
| C | 1.66428700  | -1.92069300 | -0.12412800 |
| C | 1.58632400  | -2.66242800 | -1.30568400 |
| C | 0.94590500  | -2.44491600 | 0.94877300  |
| C | 0.83467000  | -3.82203400 | -1.44540800 |
| C | 0.18373000  | -3.61206100 | 0.85619900  |
| C | 0.11387400  | -4.29460100 | -0.35195200 |
| F | 4.32431200  | -2.85666000 | -0.17418900 |
| F | 6.88284300  | -2.78657000 | -0.91968900 |
| F | 8.01355900  | -0.46117700 | -1.76346300 |
| F | 6.52242900  | 1.81759100  | -1.84715500 |
| F | 3.94869000  | 1.77258700  | -1.09794200 |
| F | 0.62556400  | 3.29907400  | 2.67771400  |
| F | 0.66328100  | 1.95372100  | 0.40787400  |
| F | 2.18326900  | 2.53590200  | 4.78405000  |
| F | 3.79047700  | 0.34705800  | 4.54362300  |
| F | 3.84151000  | -1.03824300 | 2.24606100  |
| F | 0.94910400  | -1.84971800 | 2.14545300  |
| F | -0.50128000 | -4.05645200 | 1.90673300  |
| F | -0.65439500 | -5.36901000 | -0.47415800 |
| F | 0.73714700  | -4.44114000 | -2.61878000 |
| F | 2.25399100  | -2.24101700 | -2.39098400 |
| H | -1.16806800 | 6.29337600  | 1.65884100  |
| H | -3.32446500 | 5.55517400  | 0.56051700  |
| C | -0.97100800 | 4.48497100  | -0.50076800 |
| H | -1.41205000 | 5.25634800  | -1.15391800 |
| H | -0.16973800 | 4.95866000  | 0.08276900  |
| H | -0.48668500 | 3.73895500  | -1.14853200 |

**c1c\*-TSβH**

|    |             |             |             |
|----|-------------|-------------|-------------|
| Ni | -2.92218300 | 1.08828100  | -0.89100700 |
| N  | -3.27032000 | -0.71019600 | -0.14808400 |
| N  | -1.73219900 | 0.44022200  | -2.28811900 |
| C  | -3.22536000 | -3.17205300 | -0.07886600 |
| H  | -2.96629500 | -3.99802300 | -0.75077500 |
| H  | -4.30237900 | -3.21577600 | 0.13037700  |
| H  | -2.72761900 | -3.36491100 | 0.88409400  |
| C  | -2.81386800 | -1.84642000 | -0.66414500 |
| C  | -1.96014400 | -1.90646500 | -1.78641400 |
| H  | -1.70893100 | -2.90720600 | -2.13797900 |
| C  | -1.45500600 | -0.85582100 | -2.54308500 |
| C  | -4.19900300 | -0.83127300 | 0.92877600  |
| C  | -5.57761700 | -0.71410900 | 0.64299800  |
| C  | -6.48355400 | -0.80951700 | 1.70412100  |
| H  | -7.55486400 | -0.72359400 | 1.50802200  |
| C  | -6.04361600 | -1.00623600 | 3.00881500  |
| H  | -6.76531600 | -1.07854000 | 3.82554900  |
| C  | -4.68170100 | -1.10817800 | 3.27199400  |
| H  | -4.34886900 | -1.26128100 | 4.30044300  |
| C  | -3.73248800 | -1.02546700 | 2.24640100  |
| C  | -6.06020700 | -0.47122000 | -0.77679500 |
| H  | -5.28749800 | 0.15108900  | -1.27025400 |
| C  | -7.37258300 | 0.29774500  | -0.83902500 |
| H  | -7.59354400 | 0.60048100  | -1.87236600 |
| H  | -7.35392400 | 1.20773600  | -0.22099200 |
| H  | -8.22620400 | -0.30888600 | -0.50064800 |
| C  | -6.16498800 | -1.76121300 | -1.58699300 |
| H  | -6.56380700 | -1.55915500 | -2.59202100 |
| H  | -6.84183600 | -2.48199100 | -1.10211600 |
| H  | -5.19283800 | -2.25315000 | -1.72154500 |
| C  | -2.24690700 | -1.11436700 | 2.55350100  |
| H  | -1.77354900 | -1.69690500 | 1.74417700  |
| C  | -1.94572500 | -1.83607700 | 3.85806500  |
| H  | -0.86728500 | -2.01170100 | 3.95776900  |
| H  | -2.44766300 | -2.81309100 | 3.91327700  |
| H  | -2.25850600 | -1.24941700 | 4.73497000  |
| C  | -1.57494300 | 0.25613700  | 2.52671600  |
| H  | -0.51770900 | 0.16249700  | 2.81190300  |
| H  | -2.04851900 | 0.95910100  | 3.23196300  |
| H  | -1.60646300 | 0.70484600  | 1.52104900  |
| C  | -1.09808500 | 1.42041000  | -3.06305500 |
| C  | -1.80983100 | 2.24432400  | -3.94984700 |
| C  | -1.17128600 | 3.23504300  | -4.68274100 |
| H  | -1.75637400 | 3.84843500  | -5.37182000 |
| C  | 0.94463900  | 2.67153200  | -3.69192100 |
| H  | 2.01613700  | 2.82835800  | -3.55181400 |
| C  | 0.20782300  | 3.45765500  | -4.55861000 |
| H  | -2.88441600 | 2.07856700  | -4.05013600 |
| C  | 0.29827500  | 1.65914000  | -2.95124700 |
| C  | 1.03864400  | 0.91884900  | -2.01171900 |
| N  | 1.64756800  | 0.34432200  | -1.21374200 |
| C  | -0.62553500 | -1.21742400 | -3.74502100 |
| H  | -0.98008400 | -0.69441500 | -4.64556500 |
| H  | 0.43642400  | -0.95753900 | -3.63418800 |

|   |             |             |             |
|---|-------------|-------------|-------------|
| H | -0.66239700 | -2.29608900 | -3.93311300 |
| H | 0.69596900  | 4.24506400  | -5.13414200 |
| B | 2.42965600  | -0.43623100 | -0.09986200 |
| C | -1.65559000 | 5.67992100  | 2.13223500  |
| H | -1.01236200 | 5.05388800  | 2.76498000  |
| H | -2.12739600 | 6.42810700  | 2.78341500  |
| C | -2.70024400 | 4.85831000  | 1.40620200  |
| H | -3.40327300 | 4.42270000  | 2.13575000  |
| C | -2.14309900 | 3.71873400  | 0.53427500  |
| H | -1.63107800 | 3.00131100  | 1.19937000  |
| C | -4.02611900 | 1.98468700  | 0.51964600  |
| H | -3.70004600 | 1.61914500  | 1.49810800  |
| H | -5.08312000 | 1.82249700  | 0.28888900  |
| C | -3.33278600 | 3.03441800  | -0.08547300 |
| H | -2.88374500 | 2.27602300  | -1.73716700 |
| H | -3.88849000 | 3.67267200  | -0.78714300 |
| C | 2.32691700  | 0.41191400  | 1.28322400  |
| C | 1.47307900  | 1.48111400  | 1.53905200  |
| C | 3.13655300  | 0.03011900  | 2.35505600  |
| C | 1.41481600  | 2.13373900  | 2.76918400  |
| C | 3.11607700  | 0.65558700  | 3.59810700  |
| C | 2.24374500  | 1.72372900  | 3.80674900  |
| C | 3.97443200  | -0.47675700 | -0.61882400 |
| C | 4.58417600  | 0.69217600  | -1.07631400 |
| C | 4.78669100  | -1.61040200 | -0.60492700 |
| C | 5.90626000  | 0.75222300  | -1.51096000 |
| C | 6.11570900  | -1.59607800 | -1.02795700 |
| C | 6.67812800  | -0.40671100 | -1.48552300 |
| C | 1.64946100  | -1.86916900 | -0.08373700 |
| C | 1.55915900  | -2.59274300 | -1.27542900 |
| C | 0.94365200  | -2.41050400 | 0.98910000  |
| C | 0.81219200  | -3.75437600 | -1.42275600 |
| C | 0.18326500  | -3.57813500 | 0.88785400  |
| C | 0.10501800  | -4.24541200 | -0.32841200 |
| F | 4.31542700  | -2.77939900 | -0.16809500 |
| F | 6.84900200  | -2.70221100 | -0.99614600 |
| F | 7.93887700  | -0.37664700 | -1.89302100 |
| F | 6.43326500  | 1.89343000  | -1.94248900 |
| F | 3.88721300  | 1.84164200  | -1.11059300 |
| F | 0.53522300  | 3.11515400  | 2.96213700  |
| F | 0.60357600  | 1.91973900  | 0.61466600  |
| F | 2.19425200  | 2.32824400  | 4.98513100  |
| F | 3.90165400  | 0.24282900  | 4.58478100  |
| F | 3.94011000  | -1.02982800 | 2.22116500  |
| F | 0.95632500  | -1.83248000 | 2.19481800  |
| F | -0.49174800 | -4.03724400 | 1.93867400  |
| F | -0.65702200 | -5.32357800 | -0.45668300 |
| F | 0.70370200  | -4.35697900 | -2.60379400 |
| F | 2.20819200  | -2.14981500 | -2.36316900 |
| H | -1.00095900 | 6.22731600  | 1.43943600  |
| H | -3.31593600 | 5.51895100  | 0.76837500  |
| C | -1.14604900 | 4.21303400  | -0.49897200 |
| H | -1.58982400 | 4.98406700  | -1.15059600 |
| H | -0.25365900 | 4.64286600  | -0.02463800 |
| H | -0.80508900 | 3.38981100  | -1.14127000 |

**c1c\*-PβH**

|    |             |             |             |
|----|-------------|-------------|-------------|
| Ni | -2.20173700 | 0.93233800  | -1.00952000 |
| N  | -3.11359800 | -0.62551000 | -0.24190400 |
| N  | -1.42902200 | -0.06397200 | -2.46974500 |
| C  | -3.42921900 | -3.01383200 | 0.21396700  |
| H  | -4.50532700 | -2.91131000 | 0.41381000  |
| H  | -2.96102400 | -3.02448000 | 1.20777600  |
| H  | -3.24187500 | -3.98643700 | -0.25429700 |
| C  | -2.89555500 | -1.88296500 | -0.62295600 |
| C  | -2.18804400 | -2.23376300 | -1.79308500 |
| H  | -2.12832100 | -3.29881300 | -2.01824200 |
| C  | -1.56569100 | -1.37929500 | -2.70128400 |
| C  | -3.97353500 | -0.42332500 | 0.87775300  |
| C  | -5.33693400 | -0.12749800 | 0.64367200  |
| C  | -6.16119700 | 0.12487600  | 1.74495000  |
| H  | -7.21568800 | 0.36246100  | 1.58258200  |
| C  | -5.66210000 | 0.08202900  | 3.04270600  |
| H  | -6.32030300 | 0.28369400  | 3.89072300  |
| C  | -4.32225100 | -0.22337300 | 3.25639400  |
| H  | -3.93959100 | -0.25859200 | 4.27903600  |
| C  | -3.45400800 | -0.48562800 | 2.19036100  |
| C  | -5.89779600 | -0.06601100 | -0.76747300 |
| H  | -5.05156100 | 0.15423600  | -1.44036100 |
| C  | -6.93471800 | 1.03684800  | -0.94438300 |
| H  | -7.17934400 | 1.17172400  | -2.00799800 |
| H  | -6.58632600 | 2.00499200  | -0.55612500 |
| H  | -7.88084300 | 0.80191300  | -0.43390500 |
| C  | -6.47645500 | -1.40563300 | -1.21793700 |
| H  | -6.91919500 | -1.32221700 | -2.22147800 |
| H  | -7.26911500 | -1.74863600 | -0.53499700 |
| H  | -5.71365500 | -2.19343900 | -1.27022300 |
| C  | -1.98884800 | -0.78496400 | 2.45568700  |
| H  | -1.61525200 | -1.40801000 | 1.62577500  |
| C  | -1.76734900 | -1.56738900 | 3.74278300  |
| H  | -0.72142400 | -1.88758500 | 3.82648700  |
| H  | -2.39494600 | -2.46990600 | 3.78575900  |
| H  | -1.98986100 | -0.96684100 | 4.63716500  |
| C  | -1.15973700 | 0.49493900  | 2.43709300  |
| H  | -0.10492200 | 0.28479300  | 2.65756100  |
| H  | -1.52236600 | 1.21589100  | 3.18609700  |
| H  | -1.20247100 | 0.98091700  | 1.44522900  |
| C  | -0.93895900 | 0.77343700  | -3.47752300 |
| C  | -1.70008000 | 1.10375500  | -4.60917200 |
| C  | -1.20348200 | 1.97130800  | -5.57473400 |
| H  | -1.82541500 | 2.22197200  | -6.43727700 |
| C  | 0.85974400  | 2.21816500  | -4.36029300 |
| H  | 1.86169700  | 2.63515700  | -4.24454800 |
| C  | 0.07236700  | 2.53789200  | -5.45477000 |
| H  | -2.70331100 | 0.68040000  | -4.70008200 |
| C  | 0.36439700  | 1.33562700  | -3.38298600 |
| C  | 1.14040100  | 0.93123600  | -2.28199200 |
| N  | 1.72871200  | 0.53200800  | -1.36971800 |
| C  | -0.96978300 | -1.96856200 | -3.94550200 |
| H  | -1.47575000 | -1.60454200 | -4.85145000 |

|   |             |             |             |
|---|-------------|-------------|-------------|
| H | 0.09170200  | -1.69527300 | -4.05053900 |
| H | -1.03956300 | -3.06077900 | -3.94165400 |
| H | 0.44646300  | 3.22360100  | -6.21587500 |
| B | 2.43480300  | -0.21256600 | -0.18204700 |
| C | -2.63043300 | 3.74309800  | 3.29665500  |
| H | -1.61049600 | 3.40727000  | 3.54110300  |
| H | -3.30076600 | 3.35871700  | 4.07840500  |
| C | -3.06168800 | 3.27070000  | 1.92323700  |
| H | -3.25862100 | 2.18623600  | 1.95575600  |
| C | -2.05101600 | 3.55517600  | 0.81333900  |
| H | -1.11288400 | 3.03591900  | 1.06866300  |
| C | -3.66538500 | 2.28801000  | -0.74137600 |
| H | -4.32075000 | 2.01625700  | 0.08772700  |
| H | -4.12144100 | 2.26704400  | -1.73840000 |
| C | -2.52167300 | 3.04175500  | -0.52870600 |
| H | -1.13984600 | 1.89229800  | -1.24432600 |
| H | -2.11260500 | 3.58943600  | -1.38397800 |
| C | 2.24900600  | 0.67625700  | 1.16852300  |
| C | 1.61982000  | 1.91537300  | 1.27607400  |
| C | 2.83199000  | 0.20419500  | 2.34653400  |
| C | 1.53123400  | 2.62303100  | 2.47522400  |
| C | 2.75393900  | 0.86668900  | 3.56798700  |
| C | 2.08646900  | 2.08987000  | 3.63296500  |
| C | 4.01646900  | -0.26430000 | -0.56830300 |
| C | 4.66304900  | 0.91654800  | -0.93578100 |
| C | 4.82204600  | -1.40117900 | -0.51577100 |
| C | 6.01731500  | 0.98612200  | -1.25228800 |
| C | 6.18350500  | -1.37693200 | -0.82077300 |
| C | 6.78343900  | -0.17622400 | -1.19245700 |
| C | 1.66093900  | -1.65667600 | -0.21967500 |
| C | 1.64330100  | -2.37512000 | -1.42016800 |
| C | 0.92729400  | -2.24020100 | 0.81157300  |
| C | 0.95063000  | -3.56586900 | -1.60581900 |
| C | 0.19422200  | -3.42064000 | 0.66413200  |
| C | 0.19835100  | -4.08377500 | -0.55513100 |
| F | 4.31487400  | -2.58338500 | -0.16147100 |
| F | 6.91095400  | -2.48597600 | -0.75978600 |
| F | 8.07484300  | -0.13835300 | -1.48876500 |
| F | 6.58084100  | 2.13663300  | -1.60502900 |
| F | 3.96440700  | 2.06131800  | -0.99546200 |
| F | 0.90363100  | 3.79781400  | 2.51878100  |
| F | 1.05058300  | 2.50763700  | 0.21578500  |
| F | 1.99543400  | 2.74443800  | 4.78207800  |
| F | 3.30884900  | 0.35608500  | 4.66041000  |
| F | 3.48388100  | -0.96240200 | 2.32444600  |
| F | 0.88483600  | -1.69480300 | 2.02995600  |
| F | -0.52633000 | -3.89380200 | 1.67730800  |
| F | -0.53006500 | -5.17900800 | -0.73177100 |
| F | 0.96139700  | -4.18953000 | -2.78124300 |
| F | 2.32725100  | -1.91245600 | -2.47881600 |
| H | -2.63178800 | 4.83911800  | 3.38267300  |
| H | -4.03224500 | 3.72749100  | 1.65577800  |
| C | -1.69749600 | 5.03273700  | 0.69311200  |
| H | -2.58232300 | 5.64602300  | 0.46032800  |
| H | -1.25861300 | 5.41317300  | 1.62434700  |



H        -0.95480100 5.19832000 -0.10121000

### III. References

1. O. S. Trofymchuk, G. B. Galland, M. A. Milani and R. S. Rojas, *Journal of Polymer Science Part A: Polymer Chemistry*, 2015, **53**, 452-458.
2. M. J. Frisch, G. W. Trucks, H. B. Schlegel, G. E. Scuseria, M. A. Robb, J. R. Cheeseman, G. Scalmani, V. Barone, G. A. Petersson, H. Nakatsuji, X. Li, M. Caricato, A. V. Marenich, J. Bloino, B. G. Janesko, R. Gomperts, B. Mennucci, H. P. Hratchian, J. V. Ortiz, A. F. Izmaylov, J. L. Sonnenberg, Williams, F. Ding, F. Lipparini, F. Egidi, J. Goings, B. Peng, A. Petrone, T. Henderson, D. Ranasinghe, V. G. Zakrzewski, J. Gao, N. Rega, G. Zheng, W. Liang, M. Hada, M. Ehara, K. Toyota, R. Fukuda, J. Hasegawa, M. Ishida, T. Nakajima, Y. Honda, O. Kitao, H. Nakai, T. Vreven, K. Throssell, J. A. Montgomery Jr., J. E. Peralta, F. Ogliaro, M. J. Bearpark, J. J. Heyd, E. N. Brothers, K. N. Kudin, V. N. Staroverov, T. A. Keith, R. Kobayashi, J. Normand, K. Raghavachari, A. P. Rendell, J. C. Burant, S. S. Iyengar, J. Tomasi, M. Cossi, J. M. Millam, M. Klene, C. Adamo, R. Cammi, J. W. Ochterski, R. L. Martin, K. Morokuma, O. Farkas, J. B. Foresman and D. J. Fox, *Journal*, 2016.
3. Y. Zhao and D. G. Truhlar, *The Journal of Chemical Physics*, 2006, **125**, 194101.
4. A. Bergner, M. Dolg, W. Küchle, H. Stoll and H. Preuß, *Molecular Physics*, 1993, **80**, 1431-1441.
5. M. Dolg, H. Stoll, H. Preuss and R. M. Pitzer, *The Journal of Physical Chemistry*, 1993, **97**, 5852-5859.
6. F. Weigend and R. Ahlrichs, *Physical Chemistry Chemical Physics*, 2005, **7**, 3297-3305.
7. F. Weigend, *Physical Chemistry Chemical Physics*, 2006, **8**, 1057-1065.
8. S. Grimme, J. Antony, S. Ehrlich and H. Krieg, *The Journal of Chemical Physics*, 2010, **132**, 154104.
9. A. V. Marenich, C. J. Cramer and D. G. Truhlar, *The Journal of Physical Chemistry B*, 2009, **113**, 6378-6396.
10. R. Z. Khaliullin, E. A. Cobar, R. C. Lochan, A. T. Bell and M. Head-Gordon, *The Journal of Physical Chemistry A*, 2007, **111**, 8753-8765.
11. P. R. Horn, Y. Mao and M. Head-Gordon, *Physical Chemistry Chemical Physics*, 2016, **18**, 23067-23079.
12. Y. Shao, Z. Gan, E. Epifanovsky, A. T. B. Gilbert, M. Wormit, J. Kussmann, A. W. Lange, A. Behn, J. Deng, X. Feng, D. Ghosh, M. Goldey, P. R. Horn, L. D. Jacobson, I. Kaliman, R. Z. Khaliullin, T. Kuś, A. Landau, J. Liu, E. I. Proynov, Y. M. Rhee, R. M. Richard, M. A. Rohrdanz, R. P. Steele, E. J. Sundstrom, H. L. Woodcock, P. M.

- Zimmerman, D. Zuev, B. Albrecht, E. Alguire, B. Austin, G. J. O. Beran, Y. A. Bernard, E. Berquist, K. Brandhorst, K. B. Bravaya, S. T. Brown, D. Casanova, C.-M. Chang, Y. Chen, S. H. Chien, K. D. Closser, D. L. Crittenden, M. Diedenhofen, R. A. DiStasio, H. Do, A. D. Dutoi, R. G. Edgar, S. Fatehi, L. Fusti-Molnar, A. Ghysels, A. Golubeva-Zadorozhnaya, J. Gomes, M. W. D. Hanson-Heine, P. H. P. Harbach, A. W. Hauser, E. G. Hohenstein, Z. C. Holden, T.-C. Jagau, H. Ji, B. Kaduk, K. Khistyayev, J. Kim, J. Kim, R. A. King, P. Klunzinger, D. Kosenkov, T. Kowalczyk, C. M. Krauter, K. U. Lao, A. D. Laurent, K. V. Lawler, S. V. Levchenko, C. Y. Lin, F. Liu, E. Livshits, R. C. Lochan, A. Luenser, P. Manohar, S. F. Manzer, S.-P. Mao, N. Mardirossian, A. V. Marenich, S. A. Maurer, N. J. Mayhall, E. Neuscamman, C. M. Oana, R. Olivares-Amaya, D. P. O'Neill, J. A. Parkhill, T. M. Perrine, R. Peverati, A. Prociuk, D. R. Rehn, E. Rosta, N. J. Russ, S. M. Sharada, S. Sharma, D. W. Small, A. Sodt, T. Stein, D. Stück, Y.-C. Su, A. J. W. Thom, T. Tsuchimochi, V. Vanovschi, L. Vogt, O. Vydrov, T. Wang, M. A. Watson, J. Wenzel, A. White, C. F. Williams, J. Yang, S. Yeganeh, S. R. Yost, Z.-Q. You, I. Y. Zhang, X. Zhang, Y. Zhao, B. R. Brooks, G. K. L. Chan, D. M. Chipman, C. J. Cramer, W. A. Goddard, M. S. Gordon, W. J. Hehre, A. Klamt, H. F. Schaefer, M. W. Schmidt, C. D. Sherrill, D. G. Truhlar, A. Warshel, X. Xu, A. Aspuru-Guzik, R. Baer, A. T. Bell, N. A. Besley, J.-D. Chai, A. Dreuw, B. D. Dunietz, T. R. Furlani, S. R. Gwaltney, C.-P. Hsu, Y. Jung, J. Kong, D. S. Lambrecht, W. Liang, C. Ochsenfeld, V. A. Rassolov, L. V. Slipchenko, J. E. Subotnik, T. Van Voorhis, J. M. Herbert, A. I. Krylov, P. M. W. Gill and M. Head-Gordon, *Molecular Physics*, 2015, **113**, 184-215.
13. S. Kozuch, *WIREs Computational Molecular Science*, 2012, **2**, 795-815.
  14. L. Falivene, Z. Cao, A. Petta, L. Serra, A. Poater, R. Oliva, V. Scarano and L. Cavallo, *Nature Chemistry*, 2019, **11**, 872-879.
  15. E. R. Johnson, S. Keinan, P. Mori-Sánchez, J. Contreras-García, A. J. Cohen and W. Yang, *Journal of the American Chemical Society*, 2010, **132**, 6498-6506.
  16. T. Lu and F. Chen, *Journal of Computational Chemistry*, 2012, **33**, 580-592.
  17. C. Y. Legault, Université de Sherbrooke, 2009.
